# Supplementary material for: Iron-catalysed fluoroaromatic coupling reactions under catalytic modulation with 1,2-bis(diphenylphosphino)benzene
Source: Royal Society of Chemistry journal article supplement (doi:10.1039/b820879d), 2009-01-01

Supporting Information For:

# Iron-catalysed fluoroaromatic coupling reactions under catalytic modulation with 1,2-bis(diphenylphosphino)benzene

Takuji Hatakeyama, Yoshiyuki Kondo, Yu-ichi Fujiwara, Hikaru Takaya, Shingo Ito, Eiichi Nakamura and Masaharu Nakamura\*

*International Research Center for Elements Science,*

*Institute for Chemical Research, Kyoto University, Uji, Kyoto, 611-0011, Japan*

**General.** All the reactions dealing with air- or moisture-sensitive compounds were carried out in a dry reaction vessel under a positive pressure of argon or nitrogen. Air- and moisture-sensitive liquids and solutions were transferred via a syringe or a stainless steel cannula. Analytical thin-layer chromatography (TLC) was performed on glass plates coated with 0.25 mm 230–400 mesh silica gel containing a fluorescent indicator (Merck, #1.05715.0009). TLC plates were visualized by exposure to ultraviolet light (254 nm) and/or by immersion in an acidic staining solution of *p*-anisaldehyde followed by heating on a hot plate. Organic solutions were concentrated by rotary evaporation at *ca.* 30 mmHg. Flash column chromatography was performed on Kanto silica gel 60 (spherical, neutral, 140–325 mesh) as described by Still et al.<sup>1</sup> Reversed-phase chromatography was performed on YFLC-CARTRIDGE column (ODS-SM-50C-M, Yamazen Co.) with YFLC-Wprep preparative liquid chromatograph instrument (Yamazen Co.).

**Instrumentation.** Proton nuclear magnetic resonance (<sup>1</sup>H NMR) and carbon NMR (<sup>13</sup>C NMR) spectra were recorded on JEOL EX-270 (270 MHz) or VARIAN MercuryVX (300 MHz) NMR spectrometers. Proton chemical shift values are reported in parts per million (ppm,  $\delta$  scale) downfield from tetramethylsilane and are referenced to the residual proton signal of CDCl<sub>3</sub> ( $\delta$  7.26). <sup>13</sup>C NMR spectra were recorded at 67.8 or 75.5 MHz: chemical shifts for carbons are reported in parts per million (ppm,  $\delta$  scale) downfield from tetramethylsilane and are referenced to the carbon resonance of CDCl<sub>3</sub> ( $\delta$  77.0). Data are presented as: chemical shift, multiplicity (s = singlet, d = doublet, t = triplet, q = quartet, quint = quintet, sext = sextet, sept = septet, m = multiplet and/or

---

(1) Still, W. C.; Kahn, M.; Mitra, A. *J. Org. Chem.* **1978**, *43*, 2923–2925.

multiplet resonances, br = broad), coupling constant in hertz (Hz), signal area integration in natural numbers, and assignment (*italic*). IR spectra were recorded on an FT/IR-Spectrum One (PerkinElmer). Characteristic IR absorptions are reported in  $\text{cm}^{-1}$ .

**Solvent.** Anhydrous tetrahydrofuran (THF) was purchased from Wako Chemical Co. and distilled, immediately before use, from benzophenone ketyl under argon (atmospheric pressure). Water content of the solvent was determined with a Karl-Fischer moisture titrator (MKC-210, Kyoto Electronics Company) to be less than 15 ppm.

**Materials.** Materials were purchased from Wako Pure Chemical Industries, Ltd. (Wako), Tokyo Chemical Industry Co., Ltd., Aldrich Inc., and other commercial suppliers. Florisil<sup>®</sup> (100–200 mesh) was purchased from Nacalai Tesque, Inc. Anhydrous  $\text{FeCl}_3$  (powder, 99.99%) was purchased from Aldrich Inc. and dissolved in THF at 0 °C prior to use. Zinc chloride (beads, 99.999%) and magnesium bromide (98%) were purchased from Aldrich Inc. Arylmagnesium bromides ( $\text{ArMgBr}$ ) were prepared from the corresponding aryl bromides and magnesium (turnings) using a standard method and titrated before use.

**GC analyses.** Yield (using undecane as an internal standard) was determined for a crude product by GC analyses on a Shimadzu GC-17A instrument equipped with an FID detector and a capillary column, HR-1 (Shinwa, 25 m  $\times$  0.25 mm i.d., 0.25  $\mu\text{m}$  film thickness). Diastereoselectivity was determined for a crude product and an isolated product by GC analyses.

## Screening of additives and arylmetal reagents (Table 1 with additional data)

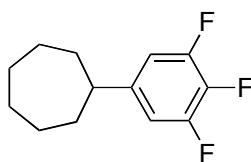

A THF solution of  $\text{FeCl}_3$  (0.060 mL, 0.10 M, 0.006 mmol) was added to a mixture of an additive,  $\text{ZnCl}_2$  (0.240 mL, 1.00 M THF solution, 0.24 mmol), 3,4,5-trifluorophenylmagnesium bromide (0.540 mL, 0.89 M THF solution, 0.48 mmol), undecane (15.6 mg, 0.10 mmol), and bromocycloheptane (27.5 mg, 0.20 mmol) at room temperature. The coupling reaction was carried out at 60 °C for 3 h. After cooling to ambient temperature, aliquot of the reaction mixture was taken to determine the yields of products **3–8** by GC analysis using undecane as an internal standard.

**Table 1** Cross-Coupling between Bromocycloheptane **2** and 3,4,5-Trifluorophenyl Metal Reagents (ArM) in the Presence of Various Additives and Ligands<sup>a</sup>

| Entry           | ArM       | Additive or Ligand (mol%)           | Products (%) <sup>b</sup> |          |          |          |          | Recov. <b>2</b> (%) <sup>b</sup> | Biaryls (%) <sup>c</sup> |                        |
|-----------------|-----------|-------------------------------------|---------------------------|----------|----------|----------|----------|----------------------------------|--------------------------|------------------------|
|                 |           |                                     | <b>3</b>                  | <b>4</b> | <b>5</b> | <b>6</b> | <b>7</b> |                                  | <b>8-F<sub>6</sub></b>   | <b>8-F<sub>5</sub></b> |
| 1               | <b>1f</b> | TMEDA (120)                         | <b>1</b>                  | 0        | < 1      | 42       | 1        | 56                               | 3                        | 3                      |
| 2               | <b>1h</b> | TMEDA (120)                         | <b>0</b>                  | 3        | 4        | 2        | 0        | 90                               | 7                        | 27                     |
| 3               | <b>1h</b> | DPPBz (6)                           | <b>91</b>                 | 3        | 0        | 4        | 2        | 0                                | 2                        | 0                      |
| 4               | <b>1h</b> | DPPE <sup>d</sup> (6)               | <b>60</b>                 | 8        | 1        | 7        | 3        | 19                               | 5                        | < 1                    |
| 5               | <b>1h</b> | DPPE <sup>d</sup> (6)               | <b>29</b>                 | 3        | < 1      | 4        | 0        | 63                               | 4                        | 1                      |
| 6               | <b>1h</b> | DPPP <sup>d</sup> (6)               | <b>25</b>                 | 4        | 0        | 3        | 0        | 66                               | 4                        | 1                      |
| 7               | <b>1h</b> | DPPF <sup>d</sup> (6)               | <b>1</b>                  | 1        | 0        | 2        | 0        | 96                               | 2                        | 14                     |
| 8               | <b>1h</b> | PPh <sub>3</sub> (12)               | <b>1</b>                  | 3        | 0        | 4        | 0        | 90                               | 5                        | 12                     |
| 9               | <b>1h</b> | DPPBz (3)                           | <b>72</b>                 | 5        | < 1      | 4        | 1        | 18                               | 6                        | < 1                    |
| 10              | <b>1g</b> | DPPBz (6)                           | <b>18</b>                 | 0        | 0        | 1        | 1        | 74                               | 3                        | 4                      |
| 11 <sup>e</sup> | <b>1g</b> | DPPBz (9)                           | <b>86</b>                 | 0        | 0        | 1        | 4        | 7                                | 5                        | 5                      |
| 12              | <b>1f</b> | DPPBz (6)                           | <b>7</b>                  | 0        | 0        | 89       | 2        | 0                                | 4                        | 0                      |
| 13 <sup>f</sup> | <b>1h</b> | none                                | <b>3</b>                  | 2        | 0        | 6        | 0        | 85                               | 4                        | 0                      |
| 14 <sup>g</sup> | <b>1h</b> | $\text{FeCl}_2(\text{dppbz})_2$ (3) | <b>93</b>                 | 2        | 0        | 2        | 1        | 0                                | 2                        | 0                      |

<sup>a</sup> Reactions were carried out on a 0.2–0.4 mmol scale. <sup>b</sup> The yield was determined by GC analysis using undecane as an internal standard. <sup>c</sup> The yield was based on the amount of ArM. <sup>d</sup> DPPEn = 1,2-bis(diphenylphosphino)ethylene, DPPE = 1,2-bis(diphenylphosphino)ethane, DPPP = 1,3-bis(diphenylphosphino)propane, DPPF = 1,2-bis(diphenylphosphino)ferrocene. <sup>e</sup> The reaction was carried out for 24 h. <sup>f</sup> The reaction was carried out for 6 h. <sup>g</sup>  $\text{FeCl}_2(\text{dppbz})_2$  (3 mol%) was used instead of  $\text{FeCl}_3$  and an additive.

## Typical procedure (A) for the reaction shown in Table 2; Synthesis of (4-fluorophenyl)cycloheptane (**9**)

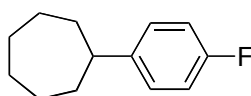

To 1,2-bis(diphenylphosphino)benzene (DPPBz, 26.8 mg, 0.06 mmol) were added  $\text{ZnCl}_2$  (1.20 mL, 1.00 M THF solution, 1.20 mmol), 4-fluorophenylmagnesium bromide (2.33 mL, 1.03 M THF solution, 2.40 mmol), and bromocycloheptane (0.177 g, 1.00 mmol) at 0 °C. After 10 min,  $\text{FeCl}_3$  (0.30 mL, 0.10 M THF solution, 0.03 mmol) was added at the same temperature. The coupling reaction was carried out at 60 °C for 3 h. After cooling to ambient temperature, aqueous ammonium chloride (saturated, 5.0 mL) was added. The aqueous layer was extracted with  $\text{Et}_2\text{O}$  three times. The combined organic extracts were filtered with a pad of Florisil (100–200 mesh, Nacalai Tesque Inc.). After removal of solvents *in vacuo*, the crude product was purified by chromatography on silica gel (hexane) to obtain the title compound (0.177 g, 92% yield, > 98% pure on GC analysis) as a colorless liquid.  $R_f$  = 0.53 (hexane); IR (neat) 2922, 2853, 1604, 1508, 1459, 1222, 1157, 818, 534;  $^1\text{H}$  NMR  $\delta$  1.45–1.94 (m, 12H,  $(\text{CH}_2)_6$ ), 2.66 (tt,  $J$  = 3.3, 9.9 Hz, 1H, ArCH), 6.92–7.00 (m, 2H, CHCFCH), 7.11–7.18 (m, 2H, CHCCH);  $^{13}\text{C}$  NMR  $\delta$  27.3 (2C), 28.1 (2C), 37.2 (2C), 46.5, 115.1 (d,  $J$  = 21.2 Hz, 2C), 128.1 (d,  $J$  = 7.4 Hz, 2C), 145.8 (d,  $J$  = 3.2 Hz), 161.2 (d,  $J$  = 243.0 Hz); Anal. calcd for  $\text{C}_{13}\text{H}_{17}\text{F}$  C, 81.21; H, 8.91. found C, 81.20; H, 8.91.

**Typical procedure (B) for the reaction shown in Table 2 and equations 1 and 2; Synthesis of (3,4,5-trifluorophenyl)cycloheptane (3)**

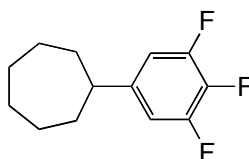

To  $\text{ZnCl}_2$  (12.0 mL, 1.00 M THF solution, 12.0 mmol) were added 3,4,5-trifluorophenylmagnesium bromide (27.0 mL, 0.89 M THF solution, 24.0 mmol) and bromocycloheptane (1.77 g, 10.0 mmol) at 0 °C. After 10 min,  $\text{FeCl}_2(\text{dppbz})_2$  (0.306 g, 0.30 mmol) was added at the same temperature. The coupling reaction was carried out at 60 °C for 3 h. After cooling to ambient temperature, aqueous ammonium chloride (saturated, 30 mL) was added. The aqueous layer was extracted with hexane three times. The combined organic extracts were filtered with a pad of Florisil (100–200 mesh, Nacalai Tesque Inc.), and concentrated *in vacuo*. The title compound (2.05 g, 90% yield, 97% pure on GC analysis, including 3% of defluorinated compound) was obtained as a colorless liquid after silica gel column chromatography (hexane).  $R_f$  = 0.57 (hexane); IR (neat) 2925, 2857, 1612, 1529, 1443, 1344, 1234, 1040;  $^1\text{H}$  NMR  $\delta$  1.46–1.90 (m, 12H,  $(\text{CH}_2)_6$ ), 2.55–2.63 (m, 1H, ArCH), 6.73–6.83 (m, 2H, CFCHCCHCF);  $^{13}\text{C}$  NMR  $\delta$  27.1 (2C), 27.9 (2C), 36.7 (2C), 46.6, 110.6 (dd,  $J$  = 6.0, 14.0 Hz, 2C), 137.9 (dt,  $J$  = 15.4, 248.2 Hz), 146.23 (td,  $J$  = 4.3, 6.6 Hz), 151.2 (ddd,  $J$  = 4.1, 9.8, 248.6 Hz, 2C). Anal. calcd for  $\text{C}_{13}\text{H}_{15}\text{F}_3$  C, 68.41; H, 6.62. found C, 68.31; H, 6.70.

**Synthesis of (3,4-difluorophenyl)cycloheptane (4)**

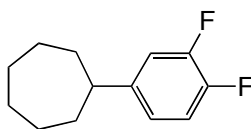

The reaction was carried out according to the typical procedure A on a 1.0 mmol scale by using 3,4-difluorophenylmagnesium bromide (2.76 mL, 0.87 M THF solution, 2.40 mmol) and bromocycloheptane (0.177 g, 1.00 mmol). Conditions: 60 °C, 3 h. The title compound (0.192 g, 91% yield, > 99% pure on GC analysis, including 0.4% of defluorinated compound) was obtained as a colorless liquid after silica gel column chromatography (hexane).  $R_f$  = 0.54 (hexane); IR (neat) 2923, 2855, 1607, 1518, 1460, 1430, 1280, 1205, 810, 772;  $^1\text{H}$  NMR  $\delta$  1.45–1.92 (m, 12H,  $(\text{CH}_2)_6$ ), 2.59–2.67 (m, 1H, ArCH), 6.85–6.91 (m, 1H, CFCHCH), 6.98 (ddd,  $J$  = 2.0, 7.8, 11.7 Hz, 1H, CFCCHC), 7.04 (td,  $J$  = 8.4, 10.5 Hz, 1H, CFCHCH);  $^{13}\text{C}$  NMR  $\delta$  27.2 (2C), 28.0 (2C), 37.0 (2C), 46.5 (d,  $J$  = 0.9 Hz), 115.5 (d,  $J$  = 16.9 Hz), 116.9 (d,  $J$  = 17.2 Hz), 122.5 (dd,  $J$  = 3.4, 5.7 Hz), 147.1 (dd,  $J$  = 4.0, 4.6 Hz), 148.6 (dd,  $J$  = 12.8, 245.0 Hz), 150.3 (dd,  $J$  = 12.6, 246.8 Hz). Anal. calcd for  $\text{C}_{13}\text{H}_{16}\text{F}_2$  C, 74.26; H, 7.67. found C, 74.18; H, 7.74.

### Synthesis of (3,5-difluorophenyl)cycloheptane (5)

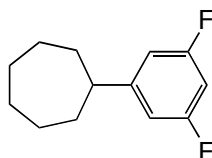

The reaction was carried out according to the typical procedure A on a 1.0 mmol scale by using 3,5-difluorophenylmagnesium bromide (3.16 mL, 0.76 M THF solution, 2.40 mmol) and bromocycloheptane (0.177 g, 1.00 mmol). Conditions: 60 °C, 3 h. The yield of the title compound was determined by  $^1\text{H}$  NMR analysis (84% yield) upon comparison with the integration of an internal standard (1,1,2,2-tetrachloroethane, 0.089 g, 0.51 mmol). A part of the crude product (0.150 / 0.197 g, Ratio A) was purified by GPC to obtain the title compound (0.115 g, 55% yield, > 98% pure on GC analysis, including 2% of defluorinated compound, 72% yield calculated from Ratio A).  $R_f$  = 0.63 (hexane); IR (neat) 2923, 2856, 1623, 1594, 1455, 1316, 1114, 994, 977, 843, 689, 510;  $^1\text{H}$  NMR  $\delta$  1.44–1.93 (m, 12H,  $(\text{CH}_2)_6$ ), 2.58–2.68 (m, 1H, ArCH), 6.49–6.79 (m, 3H, CHCFCHCFCH);  $^{13}\text{C}$  NMR  $\delta$  27.1 (2C), 28.0 (2C), 36.5 (2C), 47.0 (t,  $J$  = 1.7 Hz), 100.9 (t,  $J$  = 25.5 Hz), 109.5 (dd,  $J$  = 7.3 16.8 Hz, 2C), 154.0 (t,  $J$  = 8.3 Hz), 163.1 (dd,  $J$  = 12.8, 247.1 Hz, 2C). Anal. calcd for  $\text{C}_{13}\text{H}_{16}\text{F}_2$  C, 74.26; H, 7.67. found C, 74.38; H, 7.82.

### Synthesis of (3,4,5-trifluorophenyl)cycloheptane (3)

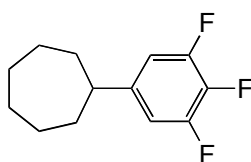

The reaction was carried out according to the typical procedure A on a 2.0 mmol scale by using 3,4,5-trifluorophenylmagnesium bromide (5.40 mL, 0.89 M THF solution, 4.80 mmol) and bromocycloheptane (0.354 g, 2.00 mmol). Conditions: 60 °C, 3 h. The title compound (0.413 g, 90% yield, 97% pure on GC analysis, including 3% of defluorinated compound) was obtained as a colorless liquid after silica gel column chromatography (hexane).

#### Synthesis of (2,5-difluorophenyl)cycloheptane (10)

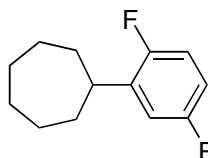

The reaction was carried out according to the typical procedure A on a 1.0 mmol scale by using 2,5-difluorophenylmagnesium bromide (3.33 mL, 0.90 M THF solution, 3.0 mmol) and 1,2-bis(diphenylphosphino)benzene (DPPBz, 40.1 mg, 0.09 mmol) and bromocycloheptane (0.177 g, 1.00 mmol). Conditions: 60 °C, 12 h. The title compound (0.167 g, 79% yield, > 99% pure on GC analysis) was obtained as a colorless liquid after silica gel column chromatography (pentane).  $R_f$  = 0.49 (hexane); IR (neat) 2925, 2856, 1594, 1492, 1461, 1240, 1181, 860, 809, 742;  $^1\text{H}$  NMR  $\delta$  1.52–1.92 (m, 12H,  $(\text{CH}_2)_6$ ), 2.93–3.03 (m, 1H, ArCH), 6.74–6.97 (m, 3H, CHCFCHCH);  $^{13}\text{C}$  NMR  $\delta$  27.1 (2C), 27.8 (2C), 35.2 (2C), 39.2 (t,  $J$  = 1.1 Hz), 112.9 (dd,  $J$  = 8.3, 23.8 Hz), 114.3 (dd,  $J$  = 5.7, 23.9 Hz), 116.0 (dd,  $J$  = 8.4, 26.1 Hz), 138.1 (dd,  $J$  = 7.2, 17.8 Hz), 155.8 (dd,  $J$  = 2.2, 237.6 Hz), 159.1 (dd,  $J$  = 2.2, 239.2 Hz). Anal. calcd for  $\text{C}_{13}\text{H}_{16}\text{F}_2$  C, 74.26; H, 7.67. found C, 74.16; H, 7.74.

#### Synthesis of (4-ethoxy-2,3-difluorophenyl)cycloheptane (SI-1)

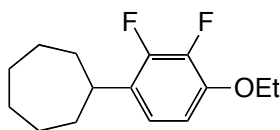

The reaction was carried out according to the typical procedure A on a 1.0 mmol scale by using 4-ethoxy-2,3-difluorophenylmagnesium bromide (2.42 mL, 0.99 M THF solution, 2.40 mmol),  $\text{FeCl}_3$  (0.50 mL, 0.10 M THF solution, 0.05 mmol), 1,2-bis(diphenylphosphino)benzene (DPPBz, 67.0 mg, 0.15 mmol) and bromocycloheptane (0.177 g, 1.00 mmol). Conditions: 80 °C, 24 h. The title compound (0.155 g, 60% yield, 99% pure on GC analysis) was obtained as a colorless liquid after silica gel column chromatography (hexane).  $R_f$  = 0.13 (hexane); IR (neat) 2924, 2856, 1636, 1509, 1474, 1296, 1169, 1114, 1078, 794;  $^1\text{H}$  NMR  $\delta$  1.43 (t,  $J$  = 6.9 Hz, 3H,  $\text{CH}_3$ ), 1.51–1.91 (m, 12H,  $(\text{CH}_2)_6$ ), 2.92 (tt,  $J$  = 3.6, 10.2 Hz, 1H, ArCH), 4.08 (q,  $J$  = 6.9 Hz, 2H,  $\text{OCH}_2$ ), 6.65 (ddd,  $J$  = 2.1, 7.5, 8.7, 1H, COCH), 6.80–6.87 (m, 1H, COCHCH);  $^{13}\text{C}$  NMR  $\delta$  14.9, 27.3 (2C), 28.0 (2C), 35.6 (2C), 39.3, 65.5, 109.6 (d,  $J$  = 3.2 Hz), 120.8 (dd,  $J$  = 4.6, 6.0 Hz), 130.5 (d,  $J$  = 12.9 Hz), 141.6 (dd,

$J = 15.2, 246.5$  Hz),  $146.0$  (dd,  $J = 3.0, 8.2$  Hz),  $149.0$  (dd,  $J = 10.3, 244.8$  Hz). Anal. calcd for  $C_{15}H_{20}F_2O$  C, 70.84; H, 7.93. found C, 70.78; H, 7.98.

### Synthesis of 1-decyl-4-ethoxy-2,3-difluorobenzene (11)

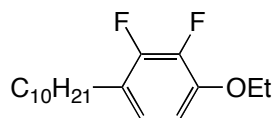

The reaction was carried out according to the typical procedure A on a 1.0 mmol scale by using 4-ethoxy-5,6-difluorophenylmagnesium bromide (4.05 mL, 0.74 M THF solution, 3.00 mmol) and iododecane (0.268 g, 1.00 mmol). Conditions:  $60\text{ }^{\circ}\text{C}$ , 24 h. The title compound (0.274 g, 92% yield, 99% pure on GC analysis) was obtained as a colorless liquid after silica gel column chromatography (hexane).  $R_f = 0.13$  (hexane); IR (neat) 2925, 2855, 1637, 1509, 1478, 1293, 1175, 1116, 1080, 794;  $^1\text{H}$  NMR  $\delta$  0.88 (t,  $J = 6.8$  Hz, 3H,  $(\text{CH}_2)_9\text{CH}_3$ ), 1.22–1.35 (m, 14H,  $(\text{CH}_2)_7\text{CH}_3$ ), 1.43 (t,  $J = 6.9$  Hz, 3H,  $\text{OCH}_2\text{CH}_3$ ), 1.52–1.58 (m, 2H,  $\text{ArCH}_2\text{CH}_2$ ), 2.57 (td,  $J = 1.1, 7.7$  Hz, 2H,  $\text{ArCH}_2$ ), 4.09 (q,  $J = 6.9$  Hz, 2H,  $\text{OCH}_2$ ), 6.64 (ddd,  $J = 1.9, 7.3, 8.9$  Hz, 1H,  $\text{COCH}$ ), 6.80 (dt,  $J = 2.3, 8.3$ , 1H,  $\text{COCHCH}$ );  $^{13}\text{C}$  NMR  $\delta$  14.3, 15.0, 22.8, 28.6, 29.4, 29.5, 29.6, 29.7, 29.8, 30.4, 32.0, 65.5, 109.4 (d,  $J = 3.2$  Hz), 123.4 (dd,  $J = 4.6, 5.7$  Hz), 123.6 (dd,  $J = 1.5, 13.7$  Hz), 141.7 (dd,  $J = 14.9, 246.5$  Hz), 146.4 (dd,  $J = 2.9, 8.3$  Hz), 149.9 (dd,  $J = 10.5, 240.1$  Hz). Anal. calcd for  $C_{18}H_{28}F_2O$  C, 72.45; H, 9.46. found C, 72.19; H, 9.57.

### Synthesis of 1-decyl-3,4-difluorobenzene (12)

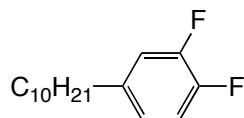

The reaction was carried out according to the typical procedure A on a 1.0 mmol scale by using 3,4-difluorophenylmagnesium bromide (2.76 mL, 0.87 M THF solution, 2.40 mmol) and bromodecane (0.221 g, 1.00 mmol). Conditions:  $80\text{ }^{\circ}\text{C}$ , 12 h. The title compound (0.213 g, 84% yield, 96% pure on GC analysis, including 4% of defluorinated compound) was obtained as a colorless liquid after silica gel column chromatography (hexane).  $R_f = 0.61$  (hexane); IR (neat) 2925, 2855, 1609, 1519, 1466, 1432, 1282, 1211, 1119, 815, 778;  $^1\text{H}$  NMR  $\delta$  0.89 (t,  $J = 6.8$  Hz, 3H,  $\text{CH}_3$ ), 1.26–1.30 (m, 14H,  $(\text{CH}_2)_7\text{CH}_3$ ), 1.58 (quint,  $J = 7.5$  Hz, 2H,  $\text{ArCH}_2\text{CH}_2$ ), 2.55 (t,  $J = 7.5$  Hz, 2H,  $\text{ArCH}_2$ ), 6.84–6.88 (m, 1H,  $\text{CFCHCH}$ ), 6.96 (ddd,  $J = 2.1, 7.7, 11.4$ , 1H,  $\text{CFCHC}$ ), 7.04 (td,  $J = 8.5, 10.3$ , 1H,  $\text{CFCHCH}$ );  $^{13}\text{C}$  NMR  $\delta$  14.2, 22.8, 29.3, 29.5, 29.6, 29.7, 29.8, 31.4, 32.1, 35.3 (d,  $J = 1.2$  Hz), 116.9 (d,  $J = 16.6$  Hz), 117.2 (d,  $J = 16.3$  Hz), 124.2 (dd,  $J = 3.4, 5.7$  Hz), 140.2 (dd,  $J = 4.0, 5.5$  Hz), 148.8 (dd,  $J = 12.7, 245.0$  Hz), 150.4 (dd,  $J = 12.5, 247.2$  Hz). Anal. calcd for  $C_{16}H_{24}F_2$  C, 75.55; H, 9.51. found C, 75.71; H, 9.55.

### Synthesis of 4-(3,4-difluorophenyl)butyronitrile (14)

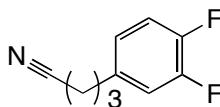

The reaction was carried out according to the typical procedure A on a 1.0 mmol scale by using 3,4-difluorophenylmagnesium bromide (2.76 mL, 0.87 M, 2.40 mmol) and 1-bromo-3-cyanopropane (0.148 g, 1.00 mmol). Conditions: 80 °C, 12 h. The title compound (0.144 g, 79% yield, 99% pure on GC analysis, including 1% of defluorinated compound) was obtained as a colorless liquid after silica gel column chromatography (1 and 3% AcOEt in hexane).  $R_f$  = 0.29 (20% EtOAc in hexane); IR (neat) 2940, 2874, 2248, 1610, 1518, 1434, 1282, 1210, 1117, 818, 779;  $^1\text{H}$  NMR  $\delta$  1.96 (quint,  $J$  = 7.2 Hz, 2H,  $\text{ArCH}_2\text{CH}_2$ ), 2.34 (t,  $J$  = 7.2 Hz, 2H,  $\text{CH}_2\text{CN}$ ), 2.75 (t,  $J$  = 7.2 Hz, 2H,  $\text{ArCH}_2$ ), 6.88–6.93 (m, 1H,  $\text{CFCHCH}$ ), 6.99 (ddd,  $J$  = 2.2, 7.8, 11.2, 1H,  $\text{CFCHC}$ ), 7.10 (td,  $J$  = 8.3, 10.2, 1H,  $\text{CFCHCH}$ );  $^{13}\text{C}$  NMR  $\delta$  16.5, 26.9, 33.7 (d,  $J$  = 1.1 Hz), 117.3 (d,  $J$  = 16.9 Hz), 117.5 (d,  $J$  = 16.6 Hz), 119.3, 124.5 (dd,  $J$  = 3.6, 6.2 Hz), 136.8 (dd,  $J$  = 4.0, 5.5 Hz), 149.3 (dd,  $J$  = 12.6, 246.8 Hz), 150.5 (dd,  $J$  = 12.8, 248.4 Hz). Anal. calcd for  $\text{C}_{10}\text{H}_9\text{F}_2\text{N}$  C, 66.29; H, 5.01; N, 7.73. found C, 66.34; H, 5.09; N, 7.57.

### Synthesis of *N*-[3-(3,4-difluorophenyl)propyl]indole (16)

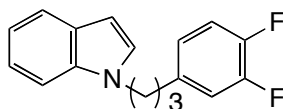

The reaction was carried out according to the typical procedure A on a 1.0 mmol scale by using 3,4-difluorophenylmagnesium bromide (2.76 mL, 0.87 M THF solution, 2.40 mmol) and *N*-(3-iodopropyl)indole (0.285 g, 1.00 mmol). Conditions: 60 °C, 3 h. The title compound (0.225 g, 83% yield, > 99% pure on GC analysis) was obtained as an orange liquid after silica gel column chromatography (1 and 3% AcOEt in hexane).  $R_f$  = 0.21 (3% EtOAc in hexane); IR (neat) 3051, 2936, 2864, 1609, 1513, 1280, 1208, 1115, 738;  $^1\text{H}$  NMR  $\delta$  2.16 (quint,  $J$  = 7.4 Hz, 2H,  $\text{CH}_2\text{CH}_2\text{CH}_2$ ), 2.58 (t,  $J$  = 7.4 Hz, 2H,  $\text{ArCH}_2$ ), 4.14 (t,  $J$  = 7.4 Hz, 2H,  $\text{NCH}_2$ ), 6.51 (dd,  $J$  = 0.8, 3.0 Hz, 1H,  $\text{NCHCH}$ ), 6.81–6.87 (m, 1H,  $\text{CFCHCH}$ ), 6.95 (ddd,  $J$  = 2.2, 7.6, 11.3 Hz, 1H,  $\text{CFCHC}$ ), 7.06 (td,  $J$  = 8.4, 10.1, 1H,  $\text{CFCHCH}$ ), 7.08 (d,  $J$  = 3.0 Hz, 1H,  $\text{NCH}$ ), 7.11 (ddd,  $J$  = 1.2, 6.8, 8.2 Hz, 1H,  $\text{NCCHCHCH}$ ), 7.21 (ddd,  $J$  = 1.2, 6.8, 8.2 Hz, 1H,  $\text{NCCHCH}$ ), 7.29 (dd,  $J$  = 1.2, 8.2 Hz, 1H,  $\text{NCCH}$ ), 7.64 (ddd,  $J$  = 0.8, 1.2, 8.2 Hz, 1H,  $\text{NCCHCHCHCH}$ );  $^{13}\text{C}$  NMR  $\delta$  31.5, 32.3, 45.6, 101.4, 109.4, 117.2 (d,  $J$  = 16.6 Hz), 117.2 (d,  $J$  = 16.9 Hz), 119.5, 121.2, 121.6, 124.3 (dd,  $J$  = 3.4, 6.0 Hz), 127.7, 128.8, 136.0, 138.0 (dd,  $J$  = 4.0, 5.4 Hz), 150.0 (dd,  $J$  = 12.6, 254.9 Hz), 150.3 (dd,  $J$  = 12.6, 248.0). Anal. calcd for  $\text{C}_{17}\text{H}_{15}\text{F}_2\text{N}$  C, 75.26; H, 5.57; N, 5.16. found C, 75.24; H, 5.82; N, 5.13.



**Synthesis of a mixture of *trans*-4-pentyl-*trans*-4'-(4-fluorophenyl)-1,1'-bi(cyclohexyl) and *trans*-4-pentyl-*cis*-4'-(4-fluorophenyl)-1,1'-bi(cyclohexyl) (SI-2)**

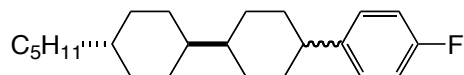

The reaction was carried out according to the typical procedure A on a 1.0 mmol scale by using 4-fluorophenylmagnesium bromide (2.33 mL, 1.03 M THF solution, 2.40 mmol) and *cis*-4-bromo-*trans*-4'-pentyl-1,1'-bi(cyclohexyl) (0.315 g, 1.00 mmol). Conditions: 60 °C, 24 h. The title compound (0.285 g, 86% yield, > 99 % pure on GC analysis, *cis:trans* = 44:56) was obtained as a colorless liquid after silica gel column chromatography (hexane).  $R_f$  = 0.54 (hexane); IR (neat) 2918, 2847, 1603, 1509, 1447, 1220, 1159, 828, 532;  $^1\text{H}$  NMR For *trans* isomer:  $\delta$  0.82–1.92 (m, 30H,  $\text{ArCHC}_{16}\text{H}_{30}$ ), 2.43 (tt,  $J$  = 3.3, 12.2 Hz, 1H,  $\text{ArCH}$ ), 6.92–7.00 (m, 2H,  $\text{CHCFCH}$ ), 7.12–7.19 (m, 2H,  $\text{CHCCH}$ ), for *cis* isomer:  $\delta$  0.82–1.92 (m, 30H,  $\text{ArCHC}_{16}\text{H}_{30}$ ), 2.64 (quint,  $J$  = 7.0 Hz, 1H,  $\text{ArCH}$ ), 6.93–7.01 (m, 2H,  $\text{CHCFCH}$ ), 7.17–7.24 (m, 2H,  $\text{CHCCH}$ );  $^{13}\text{C}$  NMR For *trans* isomer:  $\delta$  14.2, 22.9, 26.8, 30.4 (2C), 30.6 (2C), 32.4, 33.9 (2C), 35.0 (2C), 37.7, 38.2, 43.2, 43.7, 44.2, 115.0 (d,  $J$  = 20.9 Hz, 2C), 128.2 (d,  $J$  = 7.7 Hz, 2C), 143.7 (d,  $J$  = 3.2 Hz), 161.4 (d,  $J$  = 243.0 Hz), for *cis* isomer:  $\delta$  14.2, 22.9, 26.8, 27.7 (2C), 29.8 (2C), 31.2 (2C), 32.4, 33.8 (2C), 37.3, 37.6, 37.9, 39.6, 42.3, 115.0 (d,  $J$  = 20.9 Hz, 2C), 128.5 (d,  $J$  = 7.5 Hz, 2C), 143.1 (d,  $J$  = 3.1 Hz), 161.3 (d,  $J$  = 243.1 Hz). Anal. calcd for  $\text{C}_{23}\text{H}_{35}\text{F}$  C, 83.58; H, 10.67. found C, 83.42; H, 10.87.

**Synthesis of a mixture of *trans*-4-pentyl-*trans*-4'-(3,4-difluorophenyl)-1,1'-bi(cyclohexyl) and *trans*-4-pentyl-*cis*-4'-(3,4-difluorophenyl)-1,1'-bi(cyclohexyl) (I8)**

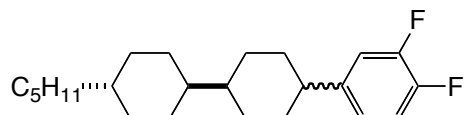

The reaction was carried out according to the typical procedure A on a 1.0 mmol scale by using 3,4-difluorophenylmagnesium bromide (4.07 mL, 0.59 M THF solution, 2.40 mmol) and *cis*-4-bromo-*trans*-4'-pentyl-1,1'-bi(cyclohexyl) (0.315 g, 1.00 mmol). Conditions: 60 °C, 24 h. The title compound (0.296 g, 85% yield, 97% pure on GC analysis, including 3% of defluorinated compound, *cis:trans* = 44:56) was obtained as a colorless liquid after silica gel column chromatography (hexane).  $R_f$  = 0.56 (hexane); IR (neat) 2919, 2851, 1607, 1517, 1448, 1277, 1212, 814, 771;  $^1\text{H}$  NMR For *trans* isomer:  $\delta$  0.81–1.92 (m, 30H,  $\text{ArCHC}_{16}\text{H}_{30}$ ), 2.41 (tt,  $J$  = 3.3, 12.1 Hz, 1H,  $\text{ArCH}$ ), 6.86–7.10 (m, 3H,  $\text{CHCFCHCH}$ ), for *cis* isomer:  $\delta$  0.81–1.92 (m, 30H,  $\text{ArCHC}_{16}\text{H}_{30}$ ), 2.62 (quint,  $J$  = 6.9 Hz, 1H,  $\text{ArCH}$ ), 6.86–7.10 (m, 3H,  $\text{CHCFCHCH}$ );  $^{13}\text{C}$  NMR For *trans* isomer:  $\delta$  14.3, 22.9, 26.8, 30.3 (2C), 30.3 (2C), 32.4, 33.8 (2C), 34.7 (2C), 37.6, 38.1, 43.0, 43.5, 44.0 (d,  $J$  = 1.1 Hz), 115.5 (d,  $J$  = 16.9 Hz), 116.9 (d,  $J$  = 17.1 Hz), 122.6 (dd,  $J$  = 3.4, 5.7 Hz), 145.0 (dd,  $J$  = 3.7, 4.9 Hz), 148.7 (dd,  $J$  = 12.9, 245.1 Hz), 150.3 (dd,  $J$  = 12.6, 246.8 Hz), for *cis* isomer:  $\delta$  14.3, 22.9, 26.8, 27.5 (2C), 29.5 (2C), 31.1 (2C), 32.4, 33.7 (2C), 37.1, 37.6, 37.8, 39.5, 42.2, 115.8 (d,  $J$  = 16.9

Hz), 116.8 (d,  $J = 16.0$  Hz), 122.9 (dd,  $J = 3.5, 6.0$  Hz), 144.5 (dd,  $J = 3.8, 4.8$  Hz), 148.6 (dd,  $J = 12.6, 245.0$  Hz), 150.3 (dd,  $J = 12.6, 246.8$  Hz). Anal. calcd for  $C_{23}H_{34}F_2$  C, 79.26; H, 9.83. found C, 79.16; H, 9.93.

**Synthesis of a mixture of *trans*-4-pentyl-*trans*-4'-(3,5-difluorophenyl)-1,1'-bi(cyclohexyl) and *trans*-4-pentyl-*cis*-4'-(3,5-difluorophenyl)-1,1'-bi(cyclohexyl) (SI-3)**

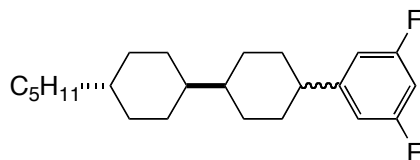

The reaction was carried out according to the typical procedure A on a 1.0 mmol scale by using 3,5-difluorophenylmagnesium bromide (3.87 mL, 0.62 M THF solution, 2.40 mmol) and *cis*-4-bromo-*trans*-4'-pentyl-1,1'-bi(cyclohexyl) (0.315 g, 1.00 mmol). Conditions: 60 °C, 24 h. The title compound (0.268 g, 77% yield, 96% pure on GC analysis, including 3% of defluorinated compound, *cis:trans* = 44:56) was obtained as a colorless liquid after silica gel column chromatography (hexane).  $R_f = 0.62$  (hexane); IR (neat) 2919, 2847, 1624, 1596, 1450, 1321, 1114, 983, 850;  $^1H$  NMR For *trans* isomer:  $\delta$  0.82–1.94 (m, 30H,  $ArCHC_{16}H_{30}$ ), 2.44 (tt,  $J = 3.2, 12.2$  Hz, 1H,  $ArCH$ ), 6.51–6.82 (m, 3H,  $CHCFCHCFCH$ ), for *cis* isomer:  $\delta$  0.82–1.94 (m, 30H,  $ArCHC_{16}H_{30}$ ), 2.65 (quint,  $J = 6.8$  Hz, 1H,  $ArCH$ ), 6.51–6.82 (m, 3H,  $CHCFCHCFCH$ );  $^{13}C$  NMR For *trans* isomer:  $\delta$  14.3, 22.9, 26.9, 30.3 (4C), 32.4, 33.8 (2C), 34.4 (2C), 37.6, 38.1, 43.0, 43.5, 44.6, 101.2 (t,  $J = 25.5$  Hz), 109.7 (dd,  $J = 7.2, 16.6$  Hz, 2C), 152.1 (t,  $J = 8.5$  Hz), 163.2 (dd,  $J = 12.9, 247.4$  Hz, 2C), for *cis* isomer:  $\delta$  14.3, 22.9, 26.8, 27.4 (2C), 29.2 (2C), 31.1 (2C), 32.4, 33.6 (2C), 37.2, 37.6, 37.9, 39.5, 42.7, 101.1 (t,  $J = 25.5$  Hz), 109.9 (dd,  $J = 7.2, 16.8$  Hz, 2C), 151.5 (t,  $J = 8.3$  Hz), 163.2 (dd,  $J = 12.9, 247.1$  Hz, 2C). Anal. calcd for  $C_{23}H_{34}F_2$  C, 79.26; H, 9.83. found C, 79.34; H, 10.01.

**Synthesis of a mixture of *trans*-4-pentyl-*trans*-4'-(3,4,5-trifluorophenyl)-1,1'-bi(cyclohexyl) and *trans*-4-pentyl-*cis*-4'-(3,4,5-trifluorophenyl)-1,1'-bi(cyclohexyl) (I9)**

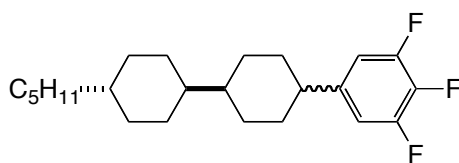

The reaction was carried out according to the typical procedure A on a 1.0 mmol scale by using 3,4,5-trifluorophenylmagnesium bromide (2.40 mL, 1.00 M THF solution, 2.40 mmol) and *cis*-4-bromo-*trans*-4'-pentyl-1,1'-bi(cyclohexyl) (0.315 g, 1.00 mmol). Conditions: 60 °C, 24 h. The title compound (0.253 g, 69% yield, 94% pure on GC analysis, including 6% of defluorinated compound, *cis:trans* = 44:56) was obtained as a colorless liquid after silica gel column chromatography (hexane);  $^1H$  NMR For *trans* isomer:  $\delta$  0.80–1.90 (m, 30H,  $ArCHC_{16}H_{30}$ ), 2.38 (tt,  $J = 2.3, 8.9$  Hz, 1H,  $ArCH$ ), 6.74–6.84 (m, 2H,  $CFCHCCHCF$ ), for *cis* isomer:  $\delta$  0.80–1.90 (m, 30H,  $ArCHC_{16}H_{30}$ ),

2.59 (quint,  $J = 6.8$  Hz, 1H, ArCH), 6.79–6.89 (m, 2H, CFCHCCHCF).  $R_f = 0.62$  (hexane); IR (neat) 2921, 2849, 1615, 1529, 1445, 1347, 1233, 1039, 847;  $^{13}\text{C}$  NMR For *trans* isomer:  $\delta$  14.3, 22.9, 26.8, 30.2 (2C), 30.2 (2C), 32.4, 33.7 (2C), 34.5 (2C), 37.6, 38.0, 42.9, 43.4, 44.1, 110.7 (dd,  $J = 6.0$ , 14.0 Hz, 2C), 138.80 (dt,  $J = 15.5$ , 248.6 Hz), 144.2 (td,  $J = 4.5$  6.6 Hz), 151.2 (ddd,  $J = 4.0$ , 9.7, 248.4 Hz, 2C), for *cis* isomer:  $\delta$  14.3, 22.9, 26.8, 27.3 (2C), 29.3 (2C), 31.0 (2C), 32.4, 33.6 (2C), 37.2, 37.6, 37.8, 39.5, 42.2, 111.0 (dd,  $J = 6.0$ , 14.0 Hz, 2C), 136.8 (dt,  $J = 15.5$ , 248.8 Hz), 143.6 (td,  $J = 4.6$  6.5 Hz), 151.2 (ddd,  $J = 4.0$ , 9.7, 248.4 Hz, 2C). Anal. calcd for  $\text{C}_{23}\text{H}_{33}\text{F}_3$  C, 75.37; H, 9.08. found C, 75.55; H, 9.11.

### Synthesis of 4-(but-3-enyl)-1,2-difluorobenzene (21)

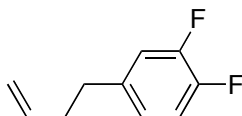

The reaction was carried out according to the typical procedure B on a 1.0 mmol scale by using 3,4-difluorophenylmagnesium bromide (2.76 mL, 0.87 M THF solution, 2.40 mmol) and cyclopropane methylbromide (0.135 g, 1.00 mmol). Conditions: 60 °C, 6 h. The yield of the title compound was determined by  $^1\text{H}$  NMR analysis (77% yield) upon comparison with the integration of an internal standard (pyrazine, 0.012 g, 0.16 mmol). The crude product was purified by silica gel column chromatography (pentane) to obtain the title compound (0.129 g, 77% yield, 98% pure on  $^1\text{H}$  NMR analysis, 2 % ether) as a colorless liquid.  $R_f = 0.62$  (hexane); IR (neat) 2928, 2858, 1609, 1516, 1433, 1282, 1210, 1117, 914, 867, 815, 774, 578;  $^1\text{H}$  NMR  $\delta$  2.34 (dt,  $J = 6.5$ , 7.8 Hz, 2H, ArCH<sub>2</sub>CH<sub>2</sub>), 2.67 (t,  $J = 7.8$  Hz, 2H, ArCH<sub>2</sub>), 4.99 (ddt,  $J = 1.1$ , 1.6, 10.3, 1H, CHHCH), 5.03 (ddt,  $J = 1.1$ , 1.6, 16.8, 1H, CHHCH), 5.81 (ddt,  $J = 6.5$ , 10.3, 16.8, 1H, CH<sub>2</sub>CHCH<sub>2</sub>), 6.85–6.90 (m, 1H, CFCHCH), 6.98 (ddd,  $J = 2.4$ , 8.1, 10.7, 1H, CFCHC), 7.05 (dt,  $J = 8.1$ , 10.7, 1H, CFCHCH);  $^{13}\text{C}$  NMR  $\delta$  34.5 (d,  $J = 1.1$  Hz), 35.2, 115.5, 116.9 (dd,  $J = 1.1$ , 16.1 Hz), 117.1 (d,  $J = 16.1$  Hz), 124.2 (dd,  $J = 3.4$ , 6.1 Hz), 137.3, 138.7 (dd,  $J = 3.8$ , 5.5 Hz), 148.7 (dd,  $J = 12.8$ , 243.7 Hz), 150.1 (dd,  $J = 12.8$ , 243.9 Hz). Anal. calcd for  $\text{C}_{10}\text{H}_{10}\text{F}_2$  C, 71.41; H, 5.99. found C, 71.44; H, 6.07.

### Synthesis of 5-butoxy-2,2-dimethyl-3-(3,4-difluorophenylmethyl)tetrahydrofuran (23)

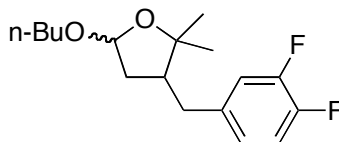

The reaction was carried out according to the typical procedure B on a 1.0 mmol scale by using 3,4-difluorophenylmagnesium bromide (2.76 mL, 0.87 M THF solution, 2.40 mmol) and 2-iodoethanal butyl 1,1-dimethyl-2-propenyl acetal (0.312 g, 1.00 mmol). Conditions: 60 °C, 15 h. The yield of the title compound was determined by  $^1\text{H}$  NMR analysis (84% yield) upon comparison with the integration of an internal standard (pyrazine, 0.016 g, 0.20 mmol). The crude product was purified

by silica gel column chromatography (hexane:CH<sub>2</sub>Cl<sub>2</sub> = 100:0 to 50:50) to obtain the title compound (0.253 g, 85% yield, *cis:trans* = 39:61 and > 99% pure on GC analysis) as a pale yellow liquid. IR (neat) 2933, 2873, 1609, 1519, 1282, 1212, 1116, 1095, 1035, 980, 771, 543; For *cis* isomer R<sub>f</sub> = 0.50 (20% EtOAc in hexane); <sup>1</sup>H NMR δ 0.92 (t, *J* = 7.0 Hz, 3H, CH<sub>3</sub>CH<sub>2</sub>), 1.23 (s, 3H, CH<sub>3</sub>CCH<sub>3</sub>), 1.25 (s, 3H, CH<sub>3</sub>CCH<sub>3</sub>), 1.30–1.43 (m, 2H, CH<sub>3</sub>CH<sub>2</sub>CH<sub>2</sub>), 1.46–1.61 (m, 2H, CH<sub>3</sub>CH<sub>2</sub>CH<sub>2</sub>), 1.68–1.79 (m, 1H, OCHCHH), 1.97–2.09 (m, 1H, OCHCHH), 2.15–2.26 (m, 1H, ArCH<sub>2</sub>CH), 2.45–2.54 (m, 1H, ArCHHCH), 2.65–2.72 (m, 1H, ArCHHCH), 3.35 (dt, *J* = 6.2, 9.4, 1H, OCHHCH<sub>2</sub>), 3.71 (dt, *J* = 6.5, 9.4, 1H, OCHHCH<sub>2</sub>), 5.02 (dd, *J* = 4.3, 5.9, 1H, OCHO), 6.84–6.90 (m, 1H, CFCHCH), 6.97 (ddd, *J* = 2.2, 8.2, 10.7, 1H, CFCHC), 7.06 (dt, *J* = 8.2, 10.7, 1H, CFCHCH); <sup>13</sup>C NMR δ 13.9, 19.4, 23.3, 28.1, 31.9, 35.8 (d, *J* = 1.1 Hz), 38.8, 50.0, 67.7, 82.6, 102.9, 117.0 (d, *J* = 16.1 Hz), 117.3 (d, *J* = 16.6 Hz), 124.4 (dd, *J* = 2.8, 6.1 Hz), 137.9 (dd, *J* = 3.9, 5.5 Hz), 148.9 (dd, *J* = 12.2, 244.8 Hz), 150.2 (dd, *J* = 12.2, 246.5 Hz). For *trans* isomer R<sub>f</sub> = 0.45 (20% EtOAc in hexane); <sup>1</sup>H NMR δ 0.90 (t, *J* = 7.0 Hz, 3H, CH<sub>3</sub>CH<sub>2</sub>), 1.11 (s, 3H, CH<sub>3</sub>CCH<sub>3</sub>), 1.31 (s, 3H, CH<sub>3</sub>CCH<sub>3</sub>), 1.23–1.40 (m, 2H, CH<sub>3</sub>CH<sub>2</sub>CH<sub>2</sub>), 1.43–1.56 (m, 2H, CH<sub>3</sub>CH<sub>2</sub>CH<sub>2</sub>), 1.68–1.81 (m, 1H, OCHCHH), 1.85–1.92 (m, 1H, OCHCHH), 2.33–2.46 (m, 2H, ArCHHCH), 2.61–2.73 (m, 1H, ArCHHCH), 3.31 (dt, *J* = 6.5, 9.6, 1H, OCHHCH<sub>2</sub>), 3.65 (dt, *J* = 6.8, 9.6, 1H, OCHHCH<sub>2</sub>), 4.97 (d, *J* = 4.9, 1H, OCHO), 6.85–6.91 (m, 1H, CFCHCH), 6.98 (ddd, *J* = 2.2, 8.1, 10.5, 1H, CFCHC), 7.06 (dt, *J* = 8.1, 10.5, 1H, CFCHCH); <sup>13</sup>C NMR δ 13.9, 19.4, 23.8, 29.7, 31.8, 35.7 (d, *J* = 1.1 Hz), 38.9, 47.6, 66.7, 83.2, 101.7, 117.1 (dd, *J* = 1.1, 17.3 Hz), 117.4 (d, *J* = 17.2 Hz), 124.5 (dd, *J* = 3.4, 5.6 Hz), 137.8 (dd, *J* = 3.9, 5.6 Hz), 148.9 (dd, *J* = 12.2, 244.2 Hz), 150.2 (dd, *J* = 12.8, 245.9 Hz). Anal. calcd for C<sub>17</sub>H<sub>24</sub>F<sub>2</sub>O<sub>2</sub> C, 68.43; H, 8.11. found C, 68.34; H, 8.14.

#### Synthesis of 4-(4-bromophenethyl)-1,2-difluorobenzene (25)

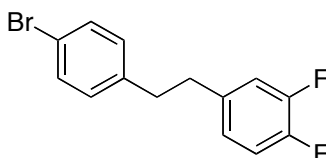

The reaction was carried out according to the typical procedure B on a 1.0 mmol scale by using 3,4-difluorophenylmagnesium bromide (2.76 mL, 0.87 M THF solution, 2.40 mmol) and 4-bromophenethyl bromide (0.264 g, 1.00 mmol). Conditions: 60 °C, 15 h. The yield of the title compound was determined by <sup>1</sup>H NMR analysis (77% yield) upon comparison with the integration of an internal standard (pyrazine, 0.026 g, 0.33 mmol). The crude product was purified by chromatography on silica gel (pentane) to give the title compound (0.205 g, 69% yield, 90% pure on GC analysis, including 3% of defluorinated compound, 2% of 3,4-difluoro-4'-ethylbiphenyl, 5% of 3,4-difluoro-4'-vinylbiphenyl). The compound was achieved by reversed-phase chromatography (MeOH:H<sub>2</sub>O = 65:35 to 100:0) to give the title compound (0.180 g, 61% yield, 97% pure on GC analysis, including 3% of defluorinated compound) as a colorless liquid. R<sub>f</sub> = 0.44 (hexane); IR (neat) 2930, 2861, 1609, 1515, 1487, 1433, 1282, 1209, 1115, 1072, 1011, 814, 777, 578, 495; <sup>1</sup>H

NMR  $\delta$  2.85 (brs, 4H,  $\text{ArCH}_2\text{CH}_2$ ), 6.77–6.83 (m, 1H,  $\text{CFCHCH}$ ), 6.93 (ddd,  $J = 2.2, 8.1, 10.8$ , 1H,  $\text{CFCHC}$ ), 6.99 (m, 2H,  $\text{CHCHCBrCHCH}$ ), 7.04 (td,  $J = 8.1, 10.8$ , 1H,  $\text{CFCHCH}$ ), 7.39 (m, 2H,  $\text{CHCBrCH}$ );  $^{13}\text{C}$  NMR  $\delta$  36.7 (d,  $J = 1.1$  Hz), 37.0 (d,  $J = 1.1$  Hz), 117.0 (dd,  $J = 1.1, 16.7$  Hz), 117.2 (d,  $J = 16.7$  Hz), 119.9, 124.3 (dd,  $J = 3.3, 6.1$  Hz), 130.2 (2C), 131.5 (2C), 138.0 (dd,  $J = 3.9, 5.6$  Hz), 139.8, 148.9 (dd,  $J = 12.2, 244.3$  Hz), 150.1 (dd,  $J = 12.8, 245.9$  Hz). Anal. calcd for  $\text{C}_{14}\text{H}_{11}\text{BrF}_2$  C, 56.59; H, 3.73. found C, 56.71; H, 3.84.

**$^1\text{H}$  and  $^{13}\text{C}$  NMR Spectra of the compounds 3–5, 9–12, 14, 16, 18, 19, 21, 23, 25, SI-1, SI-2, SI-3.**

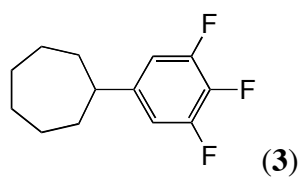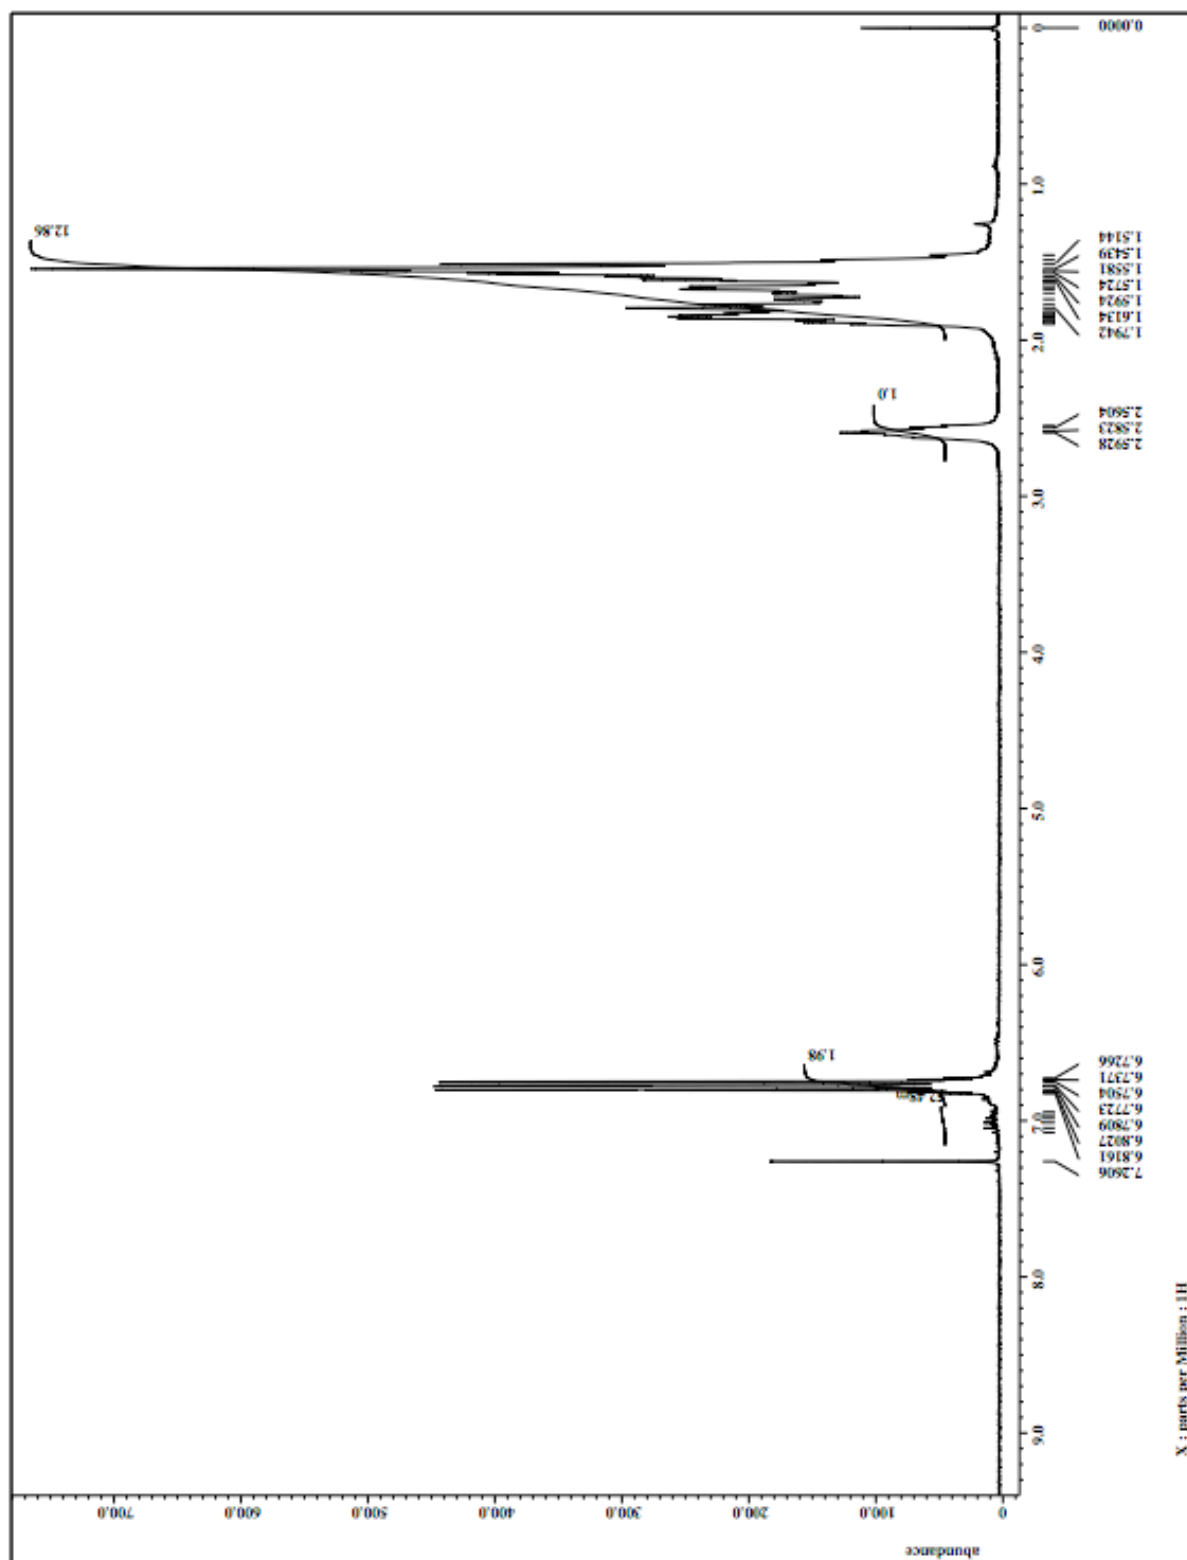

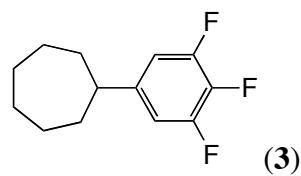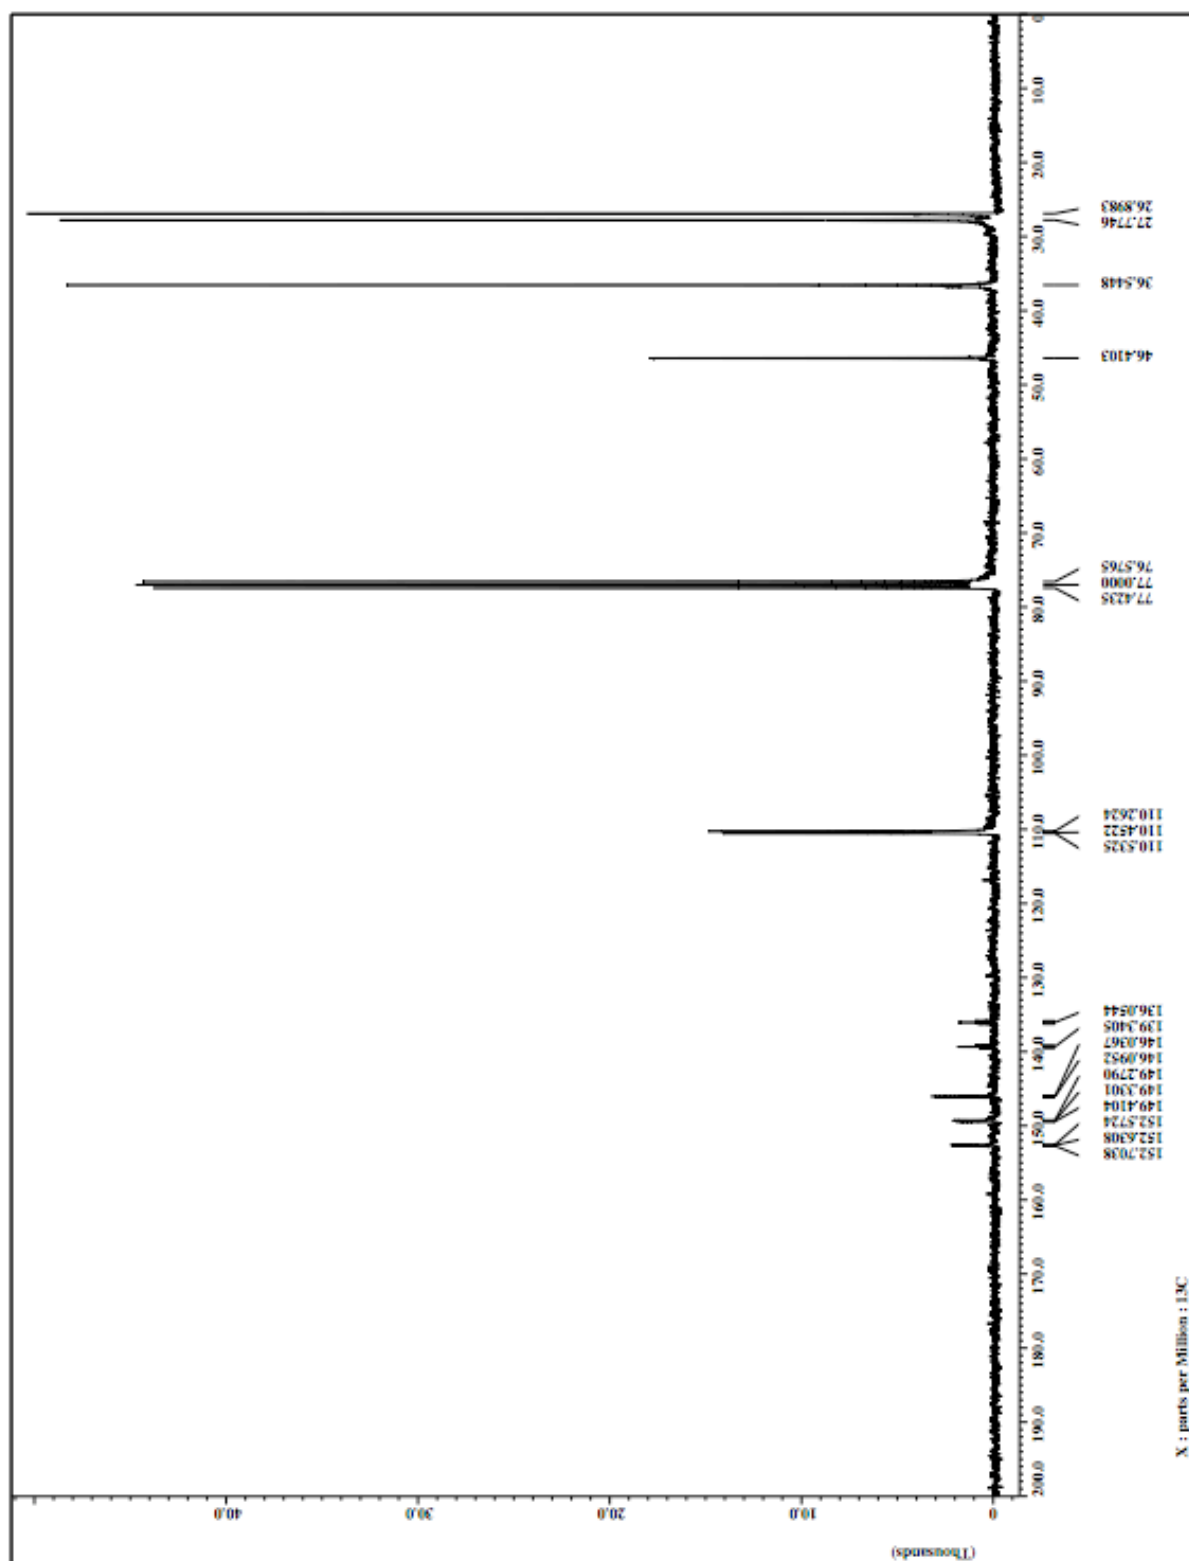

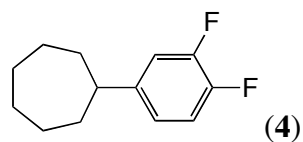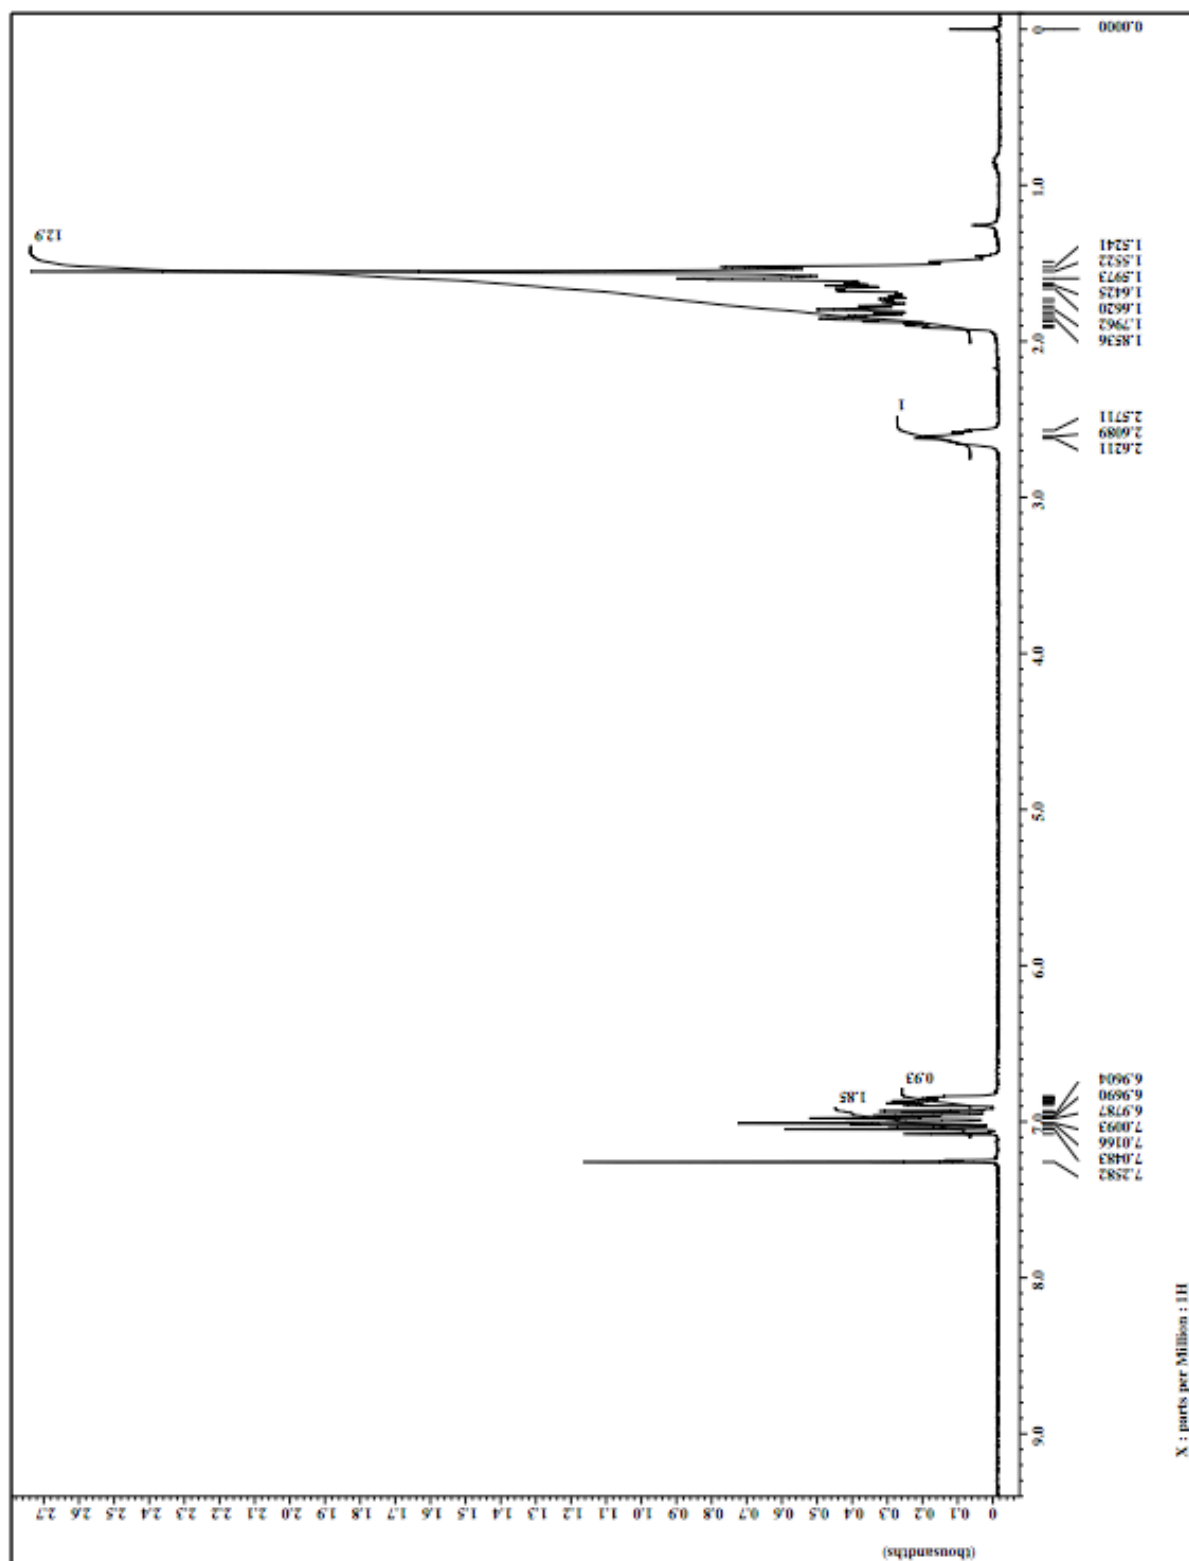



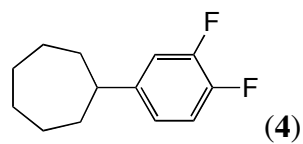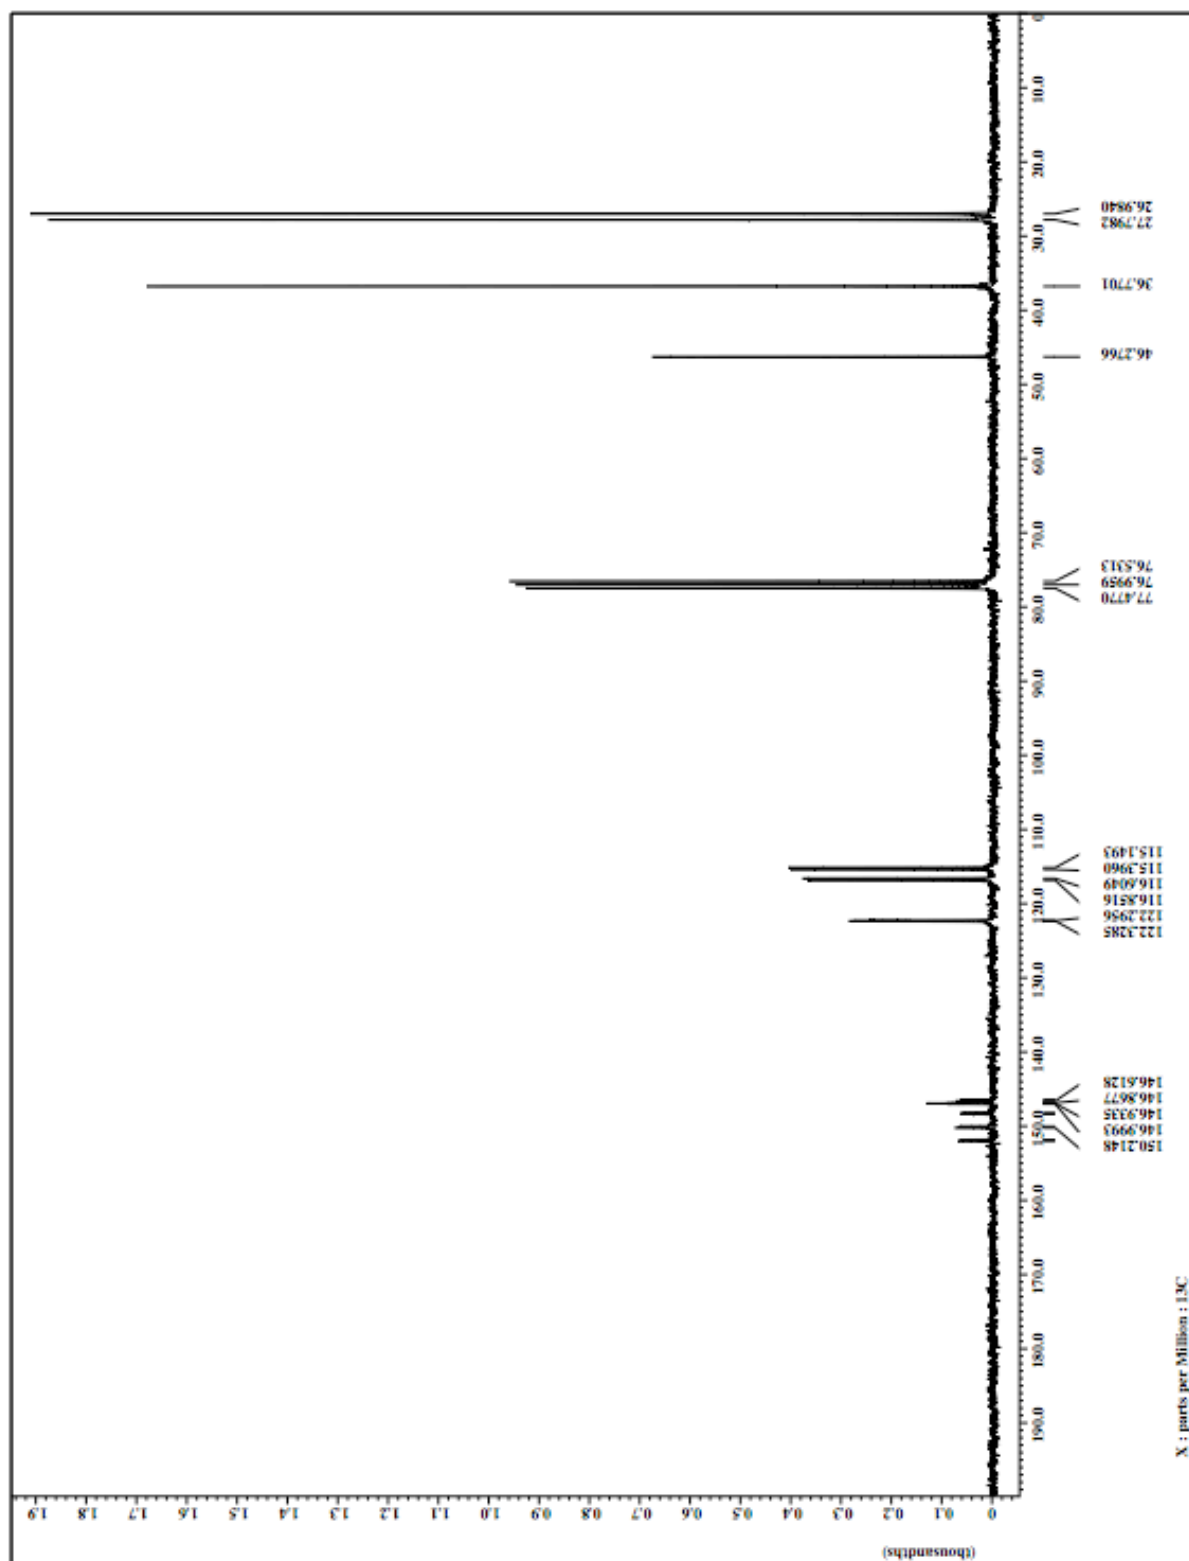

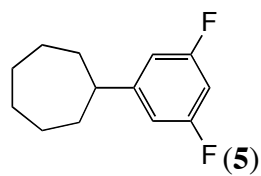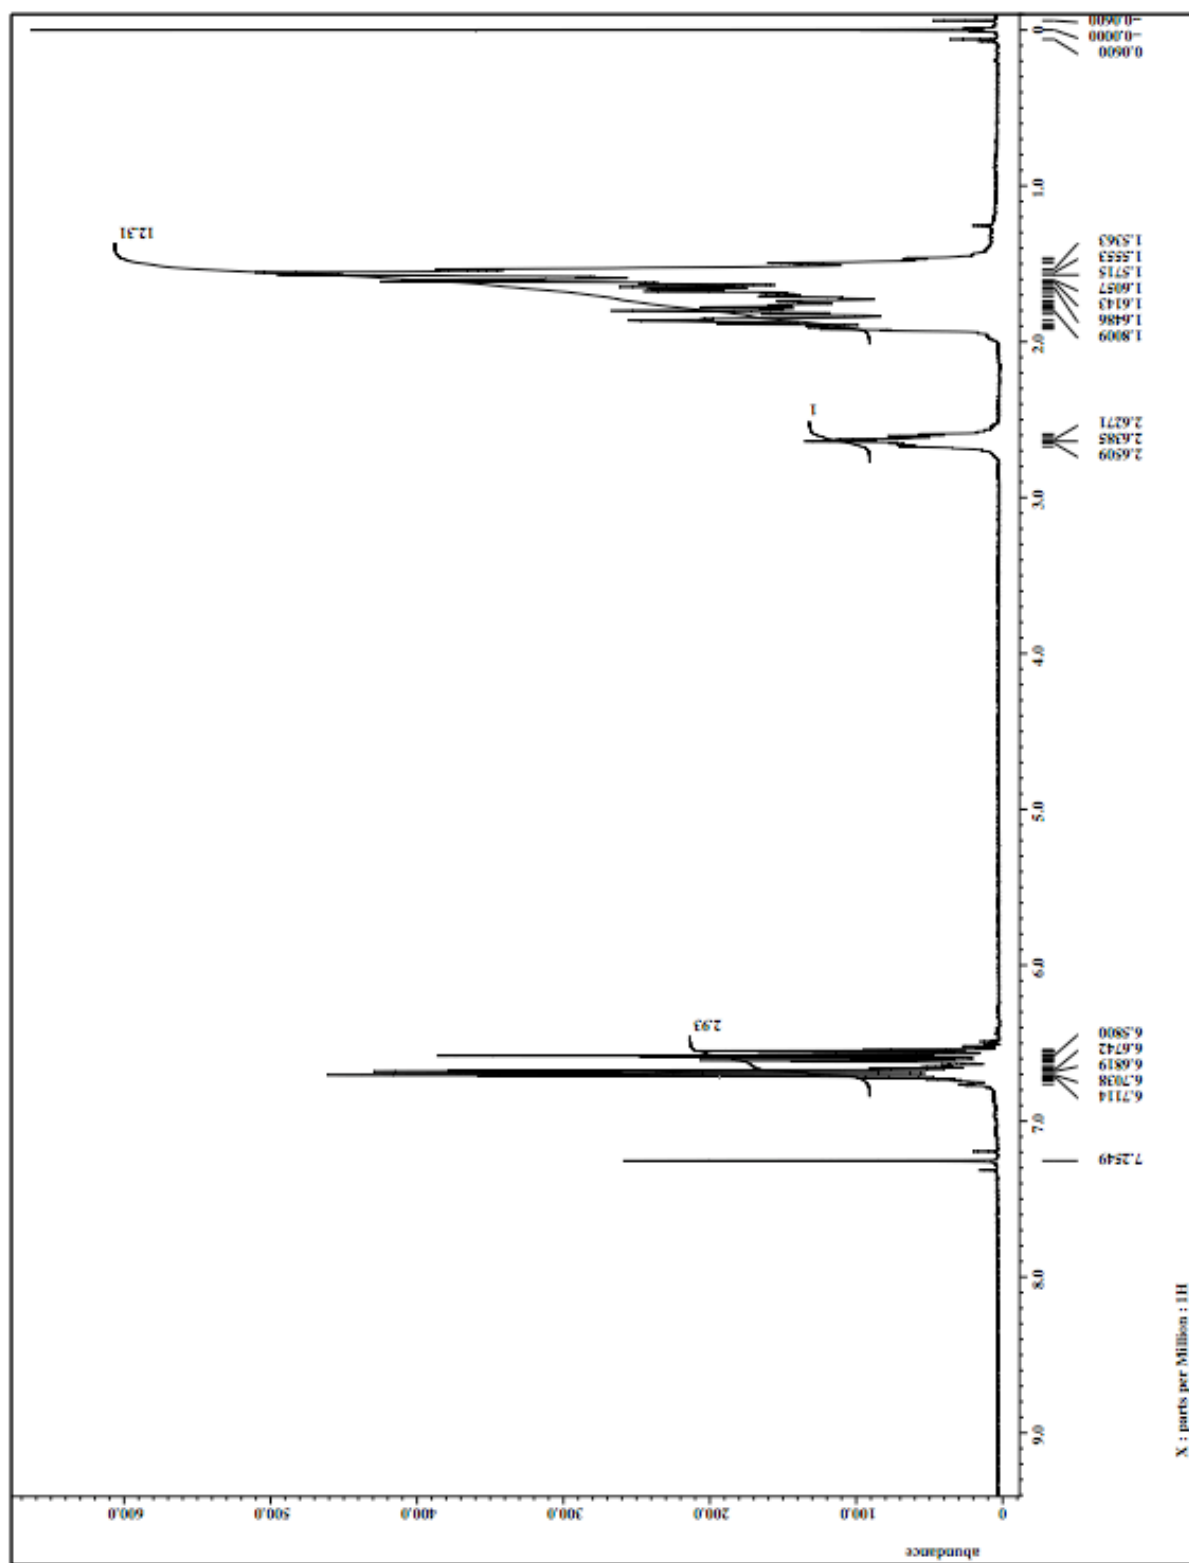

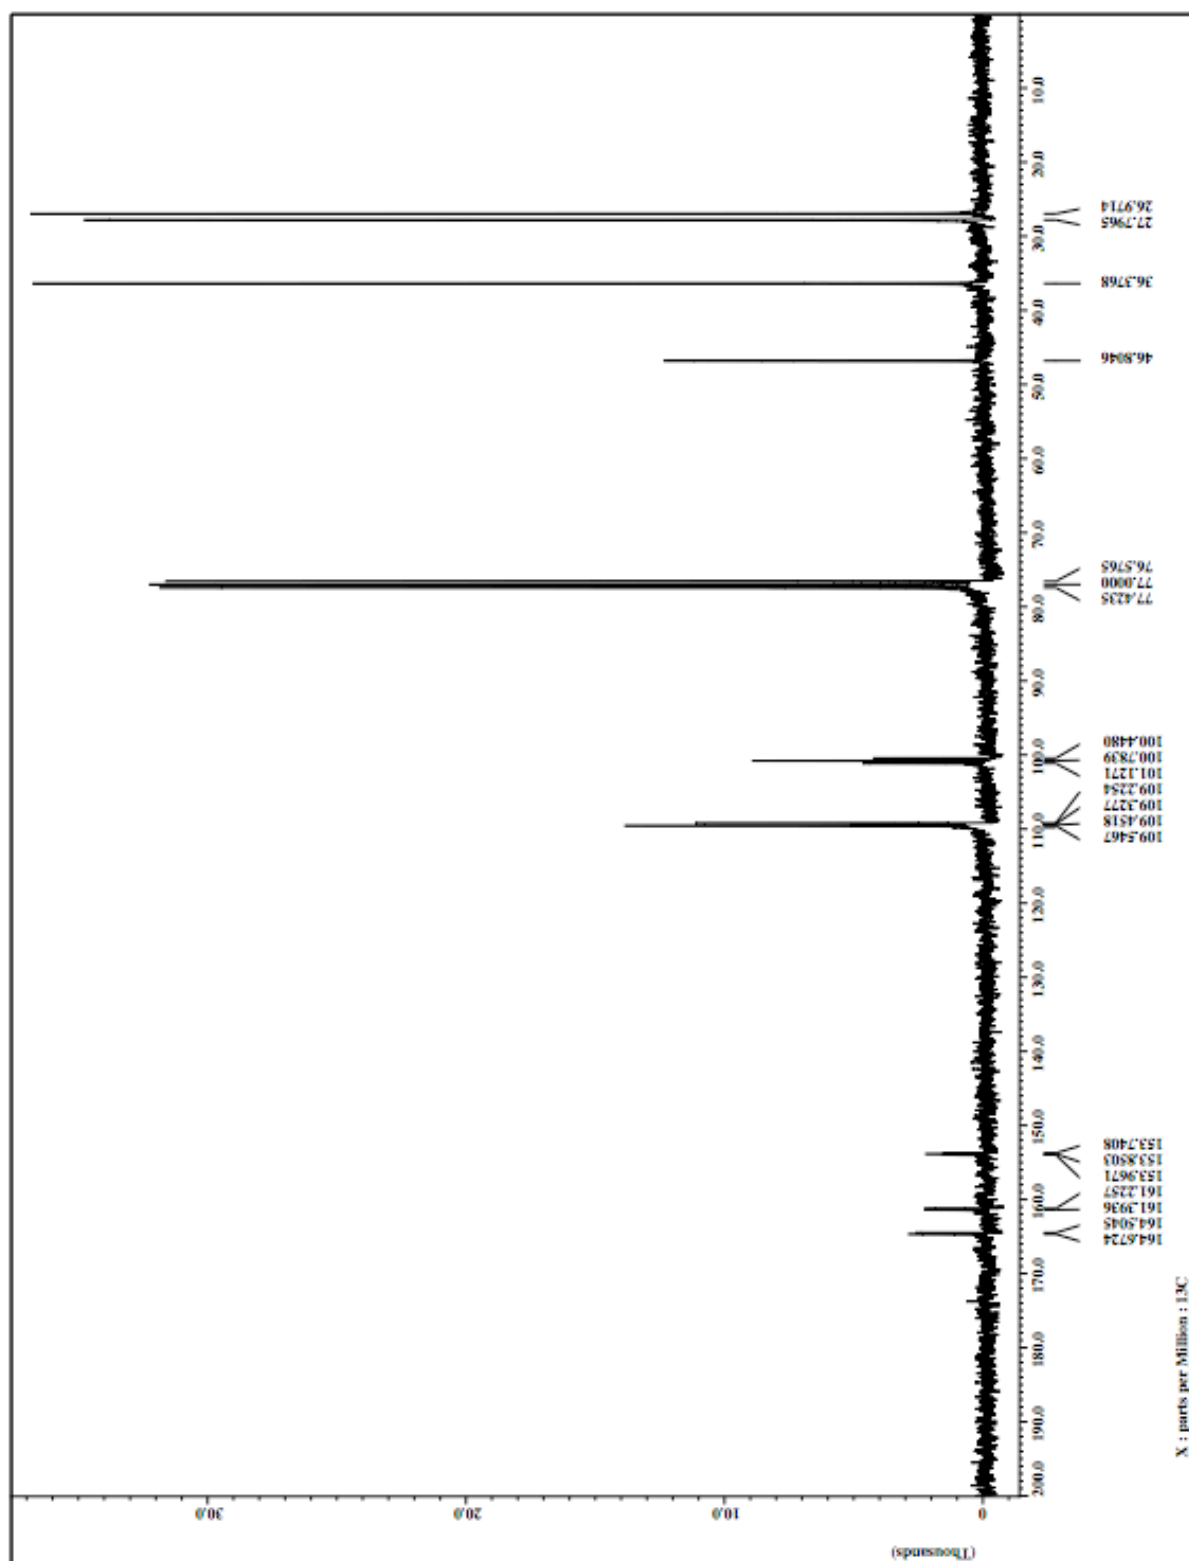

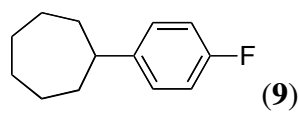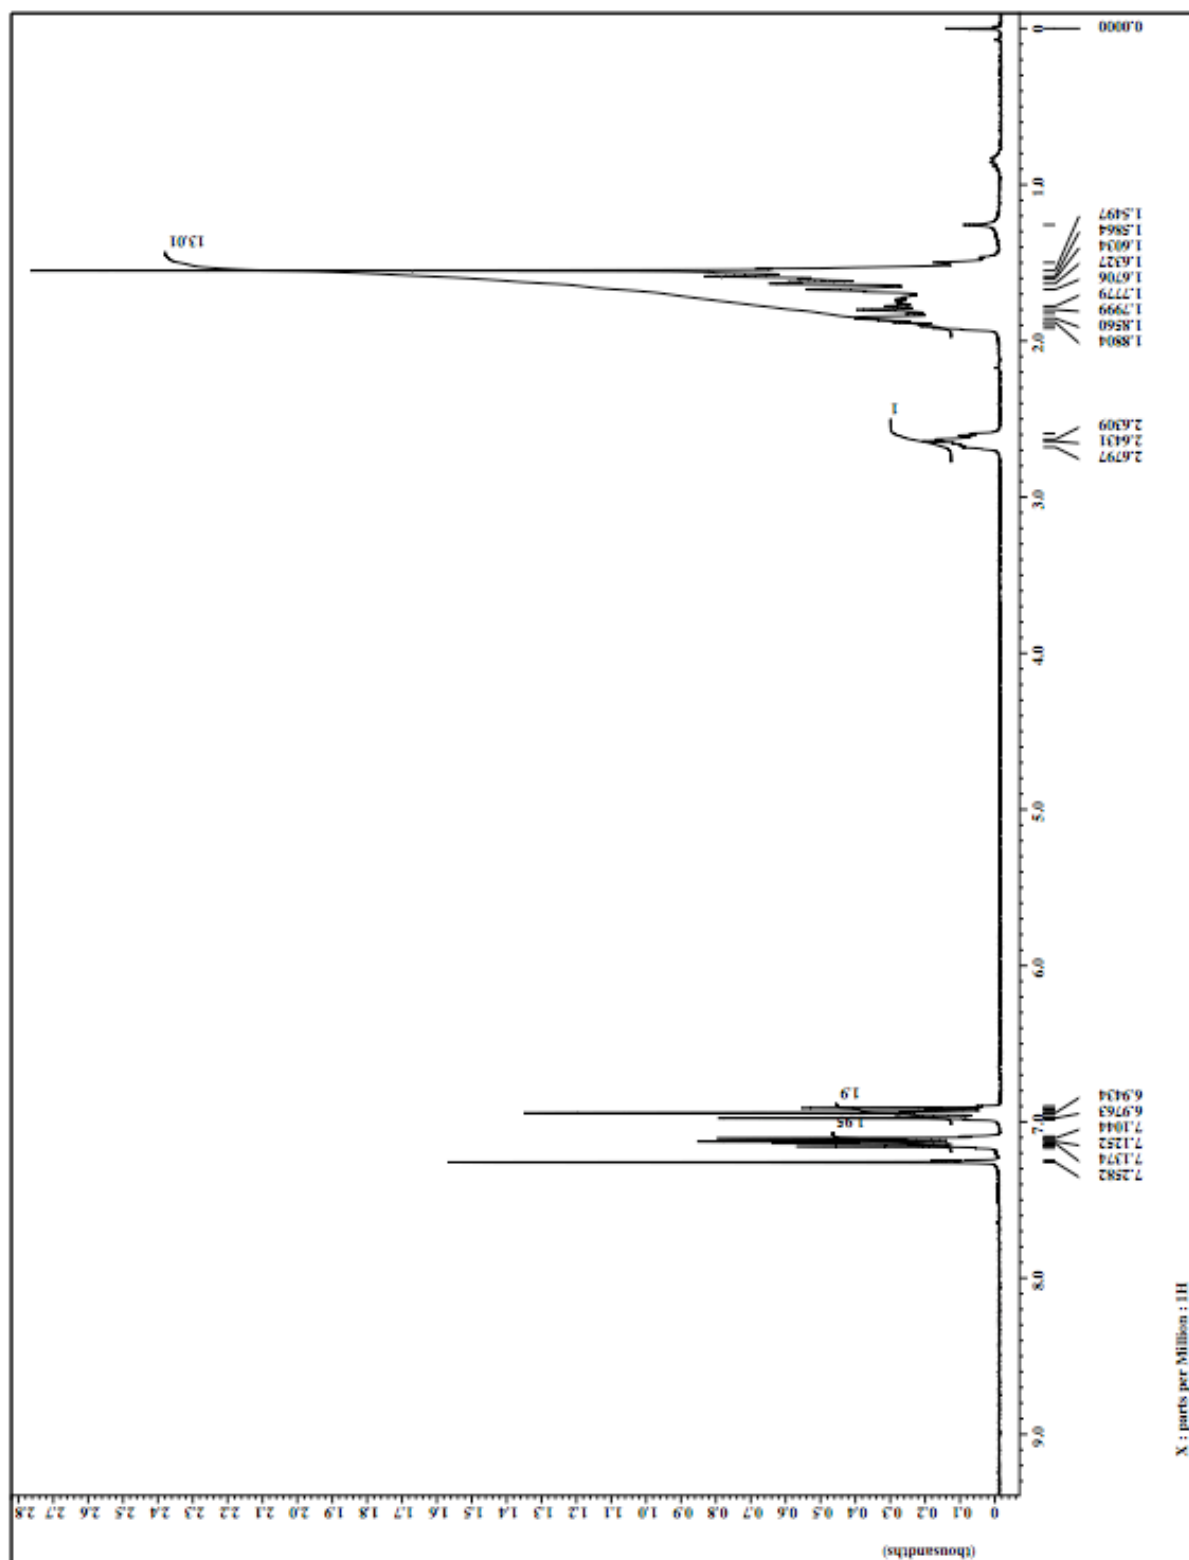

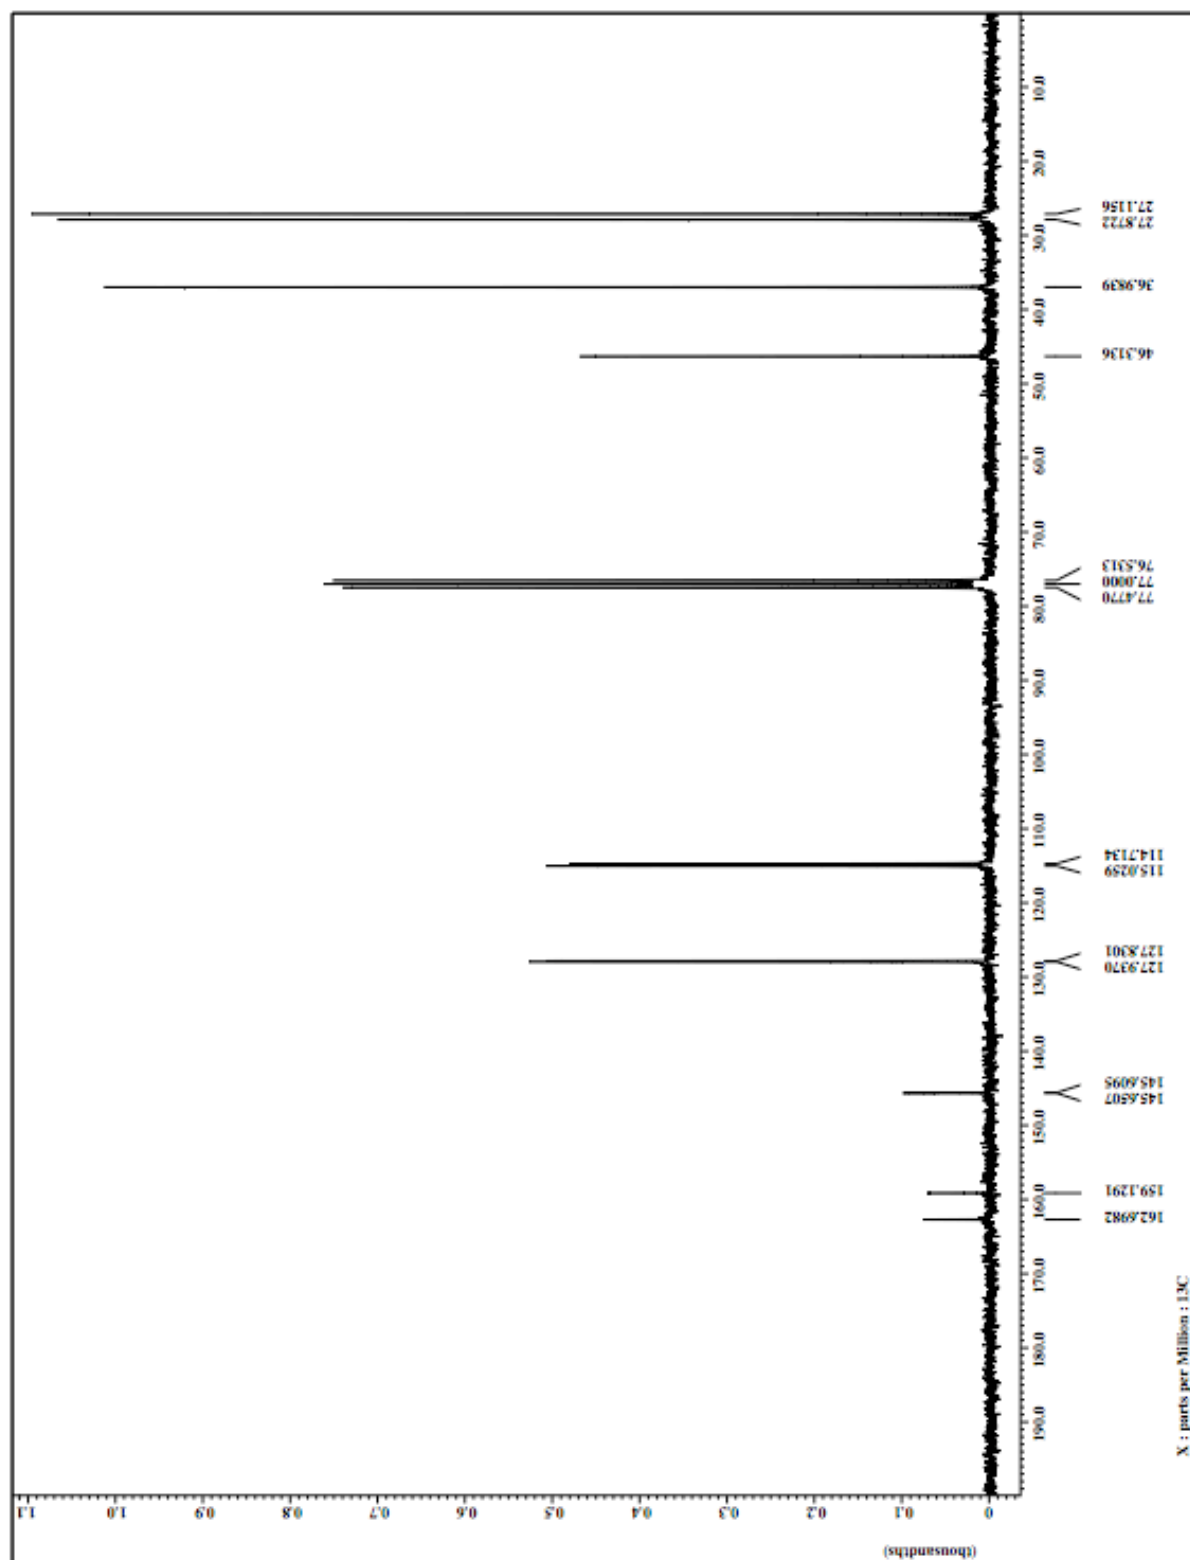

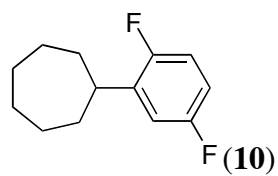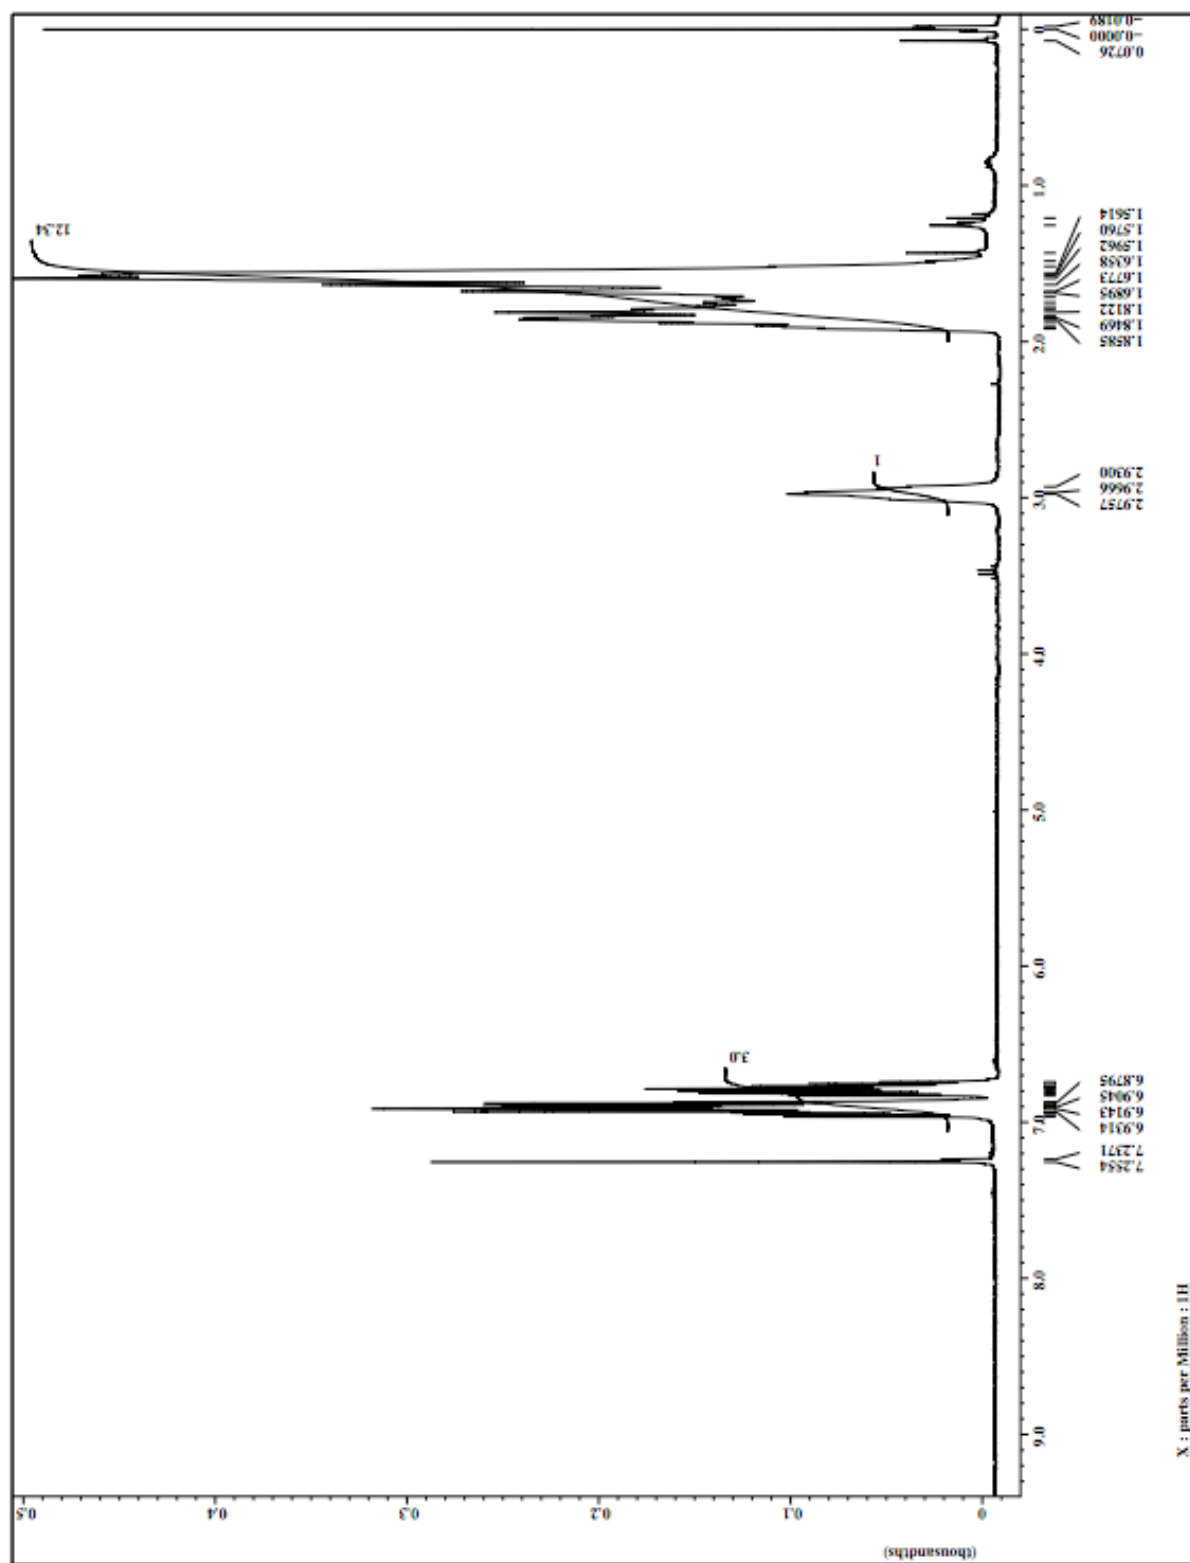

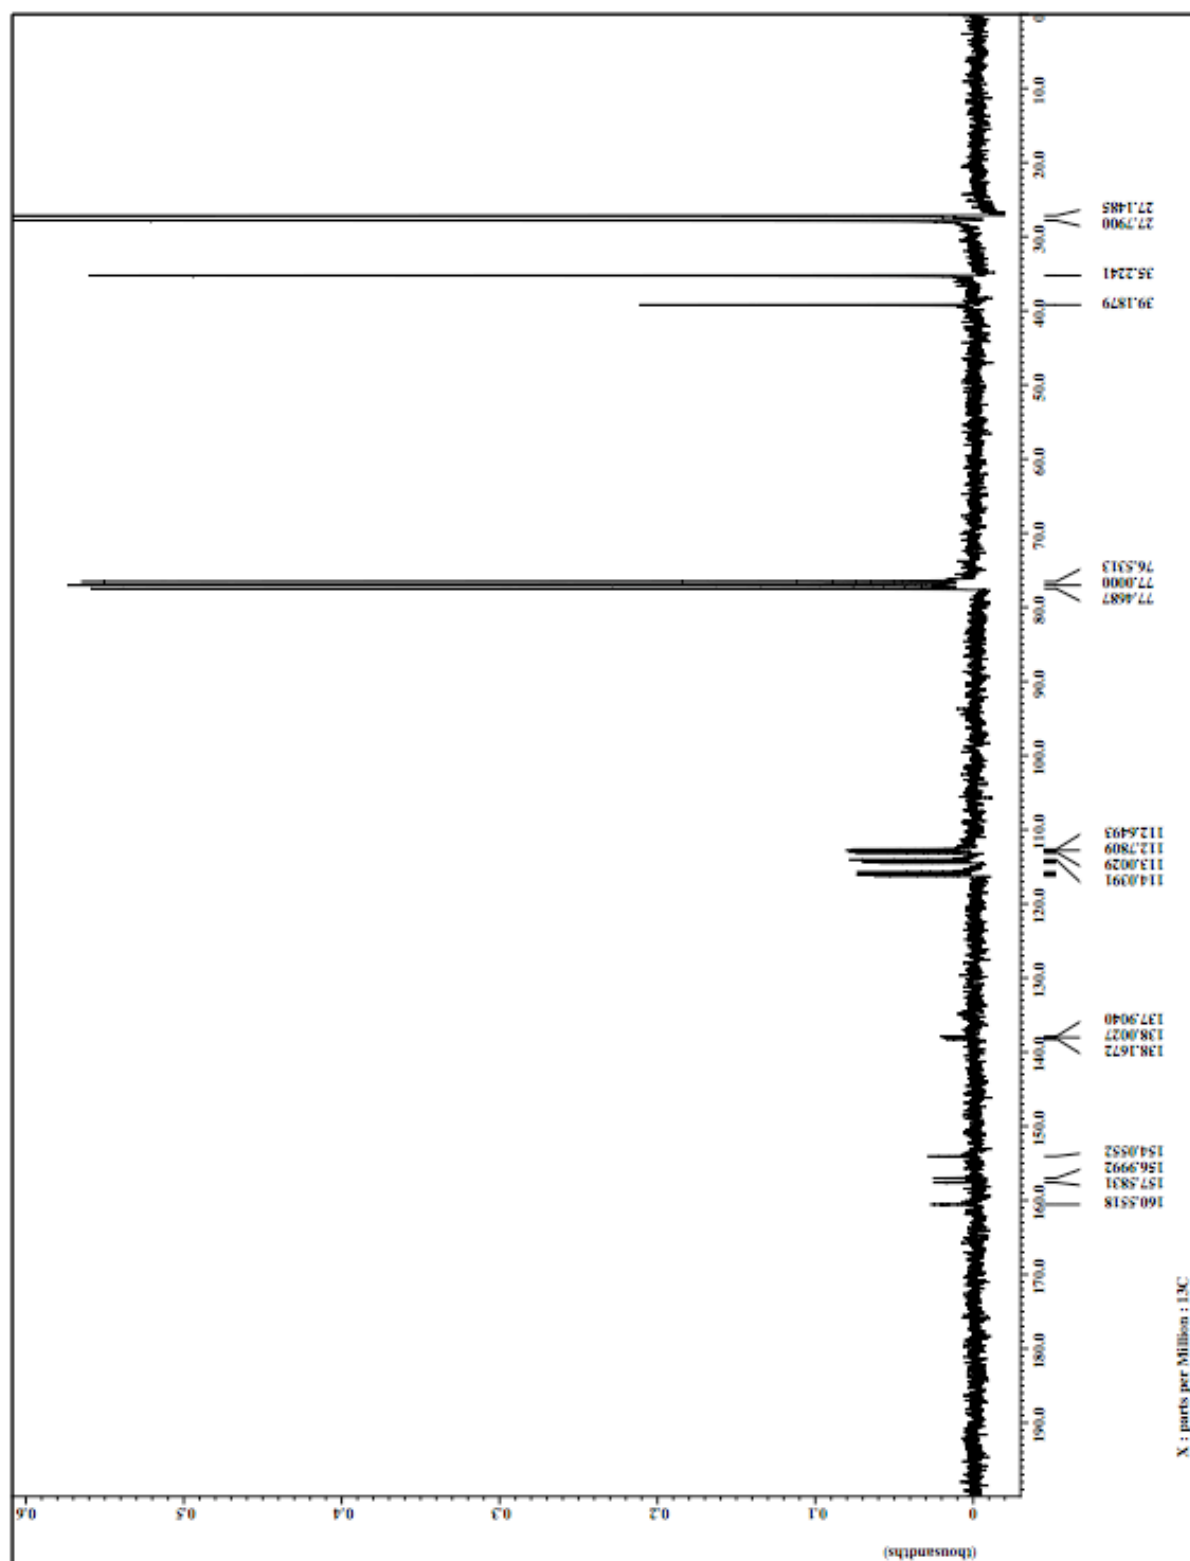

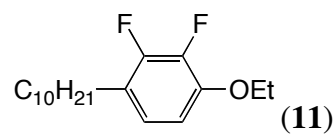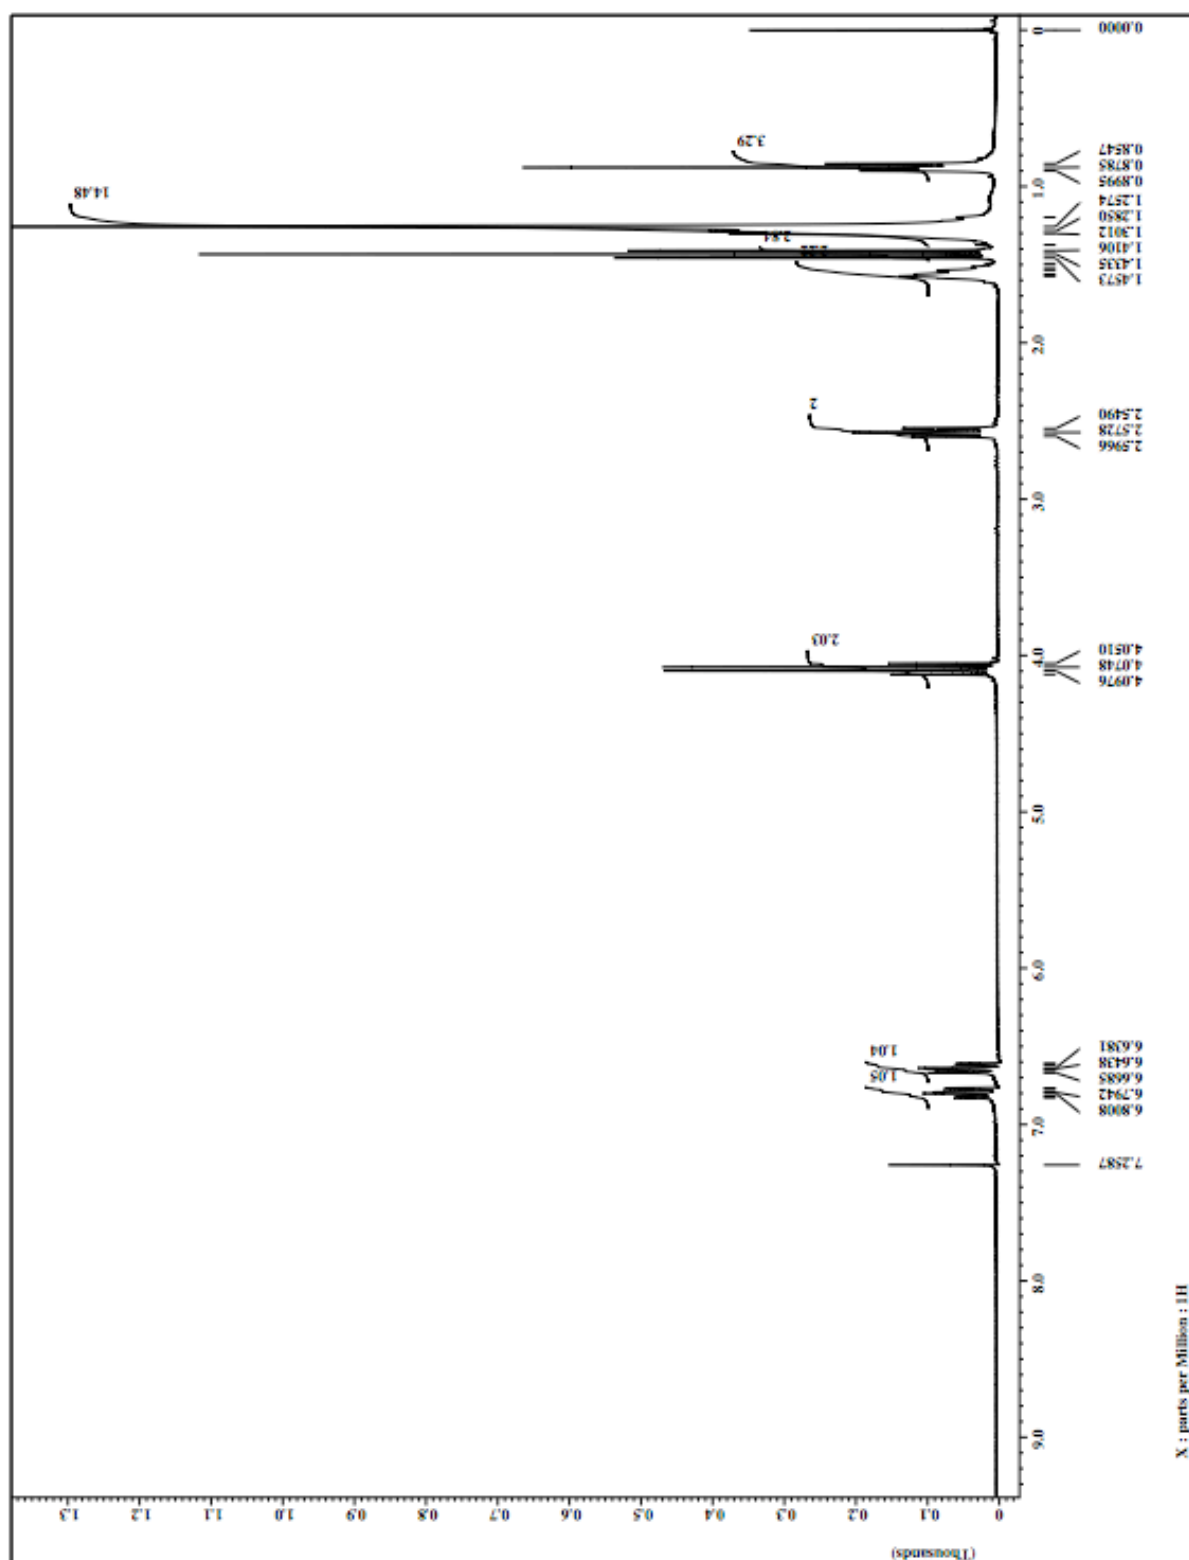



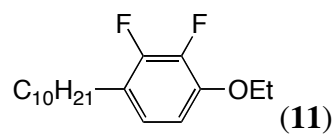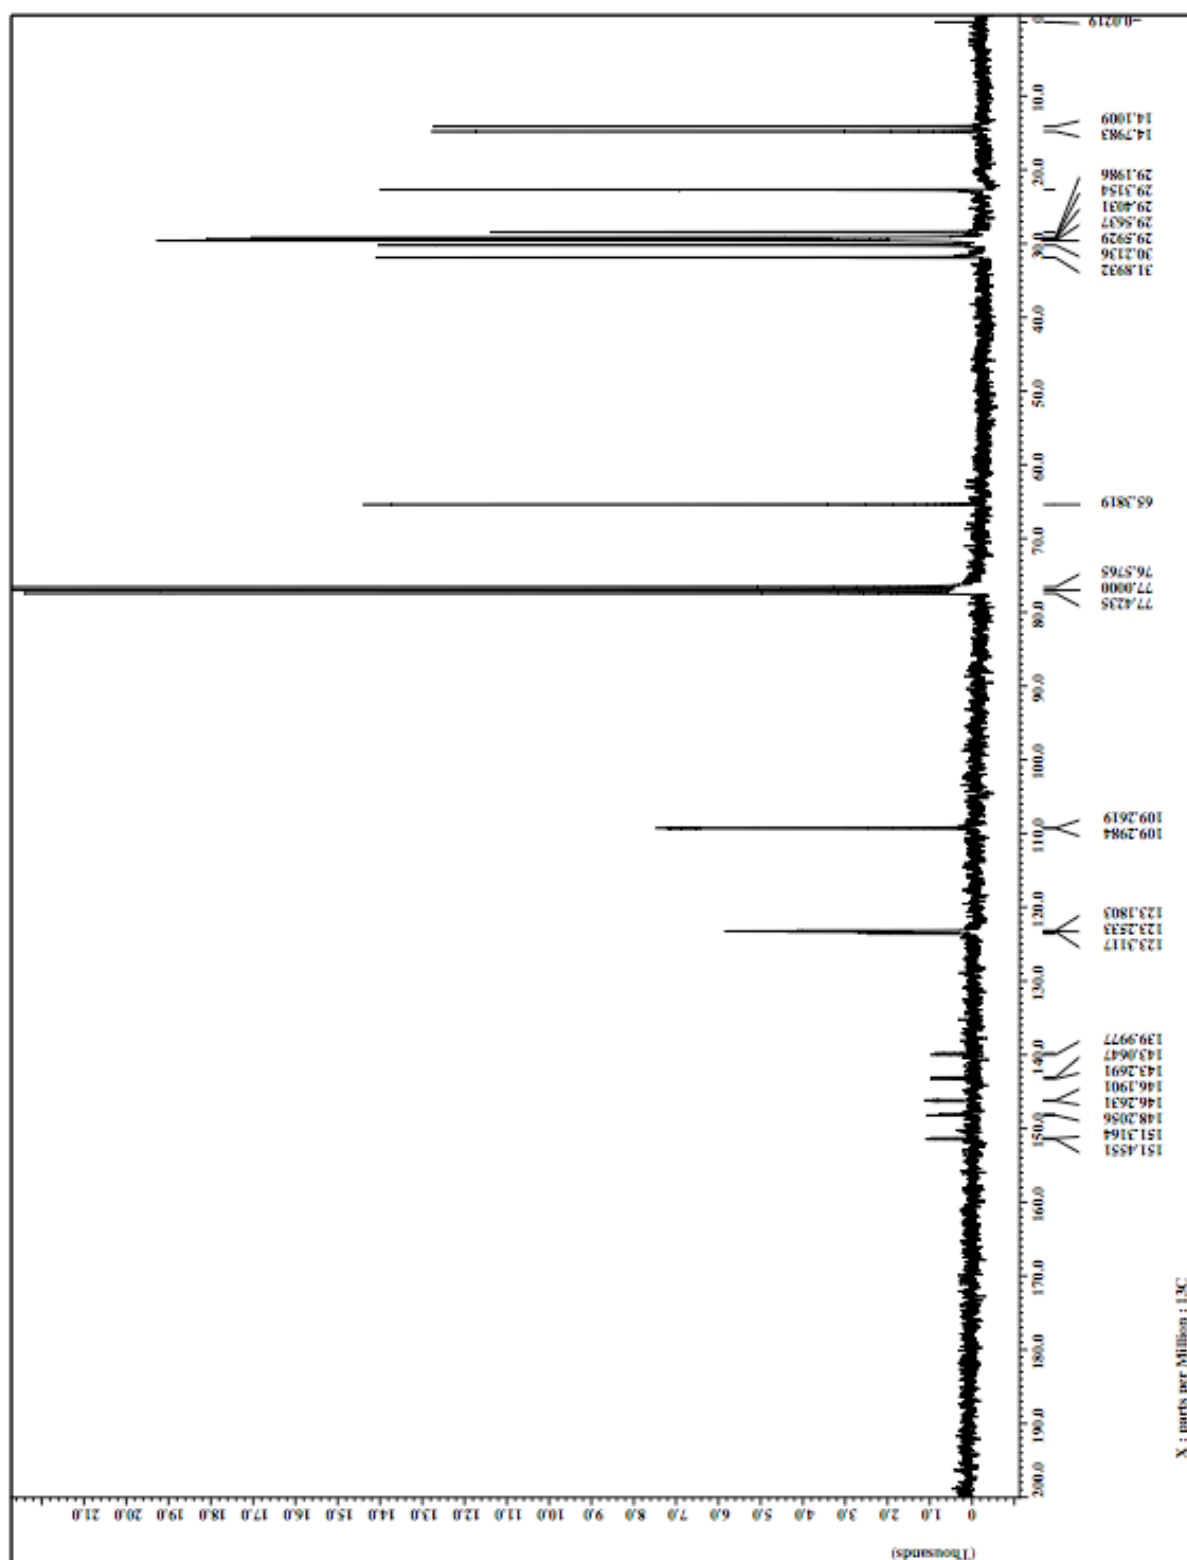

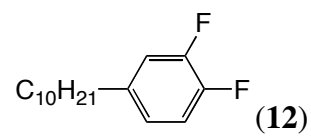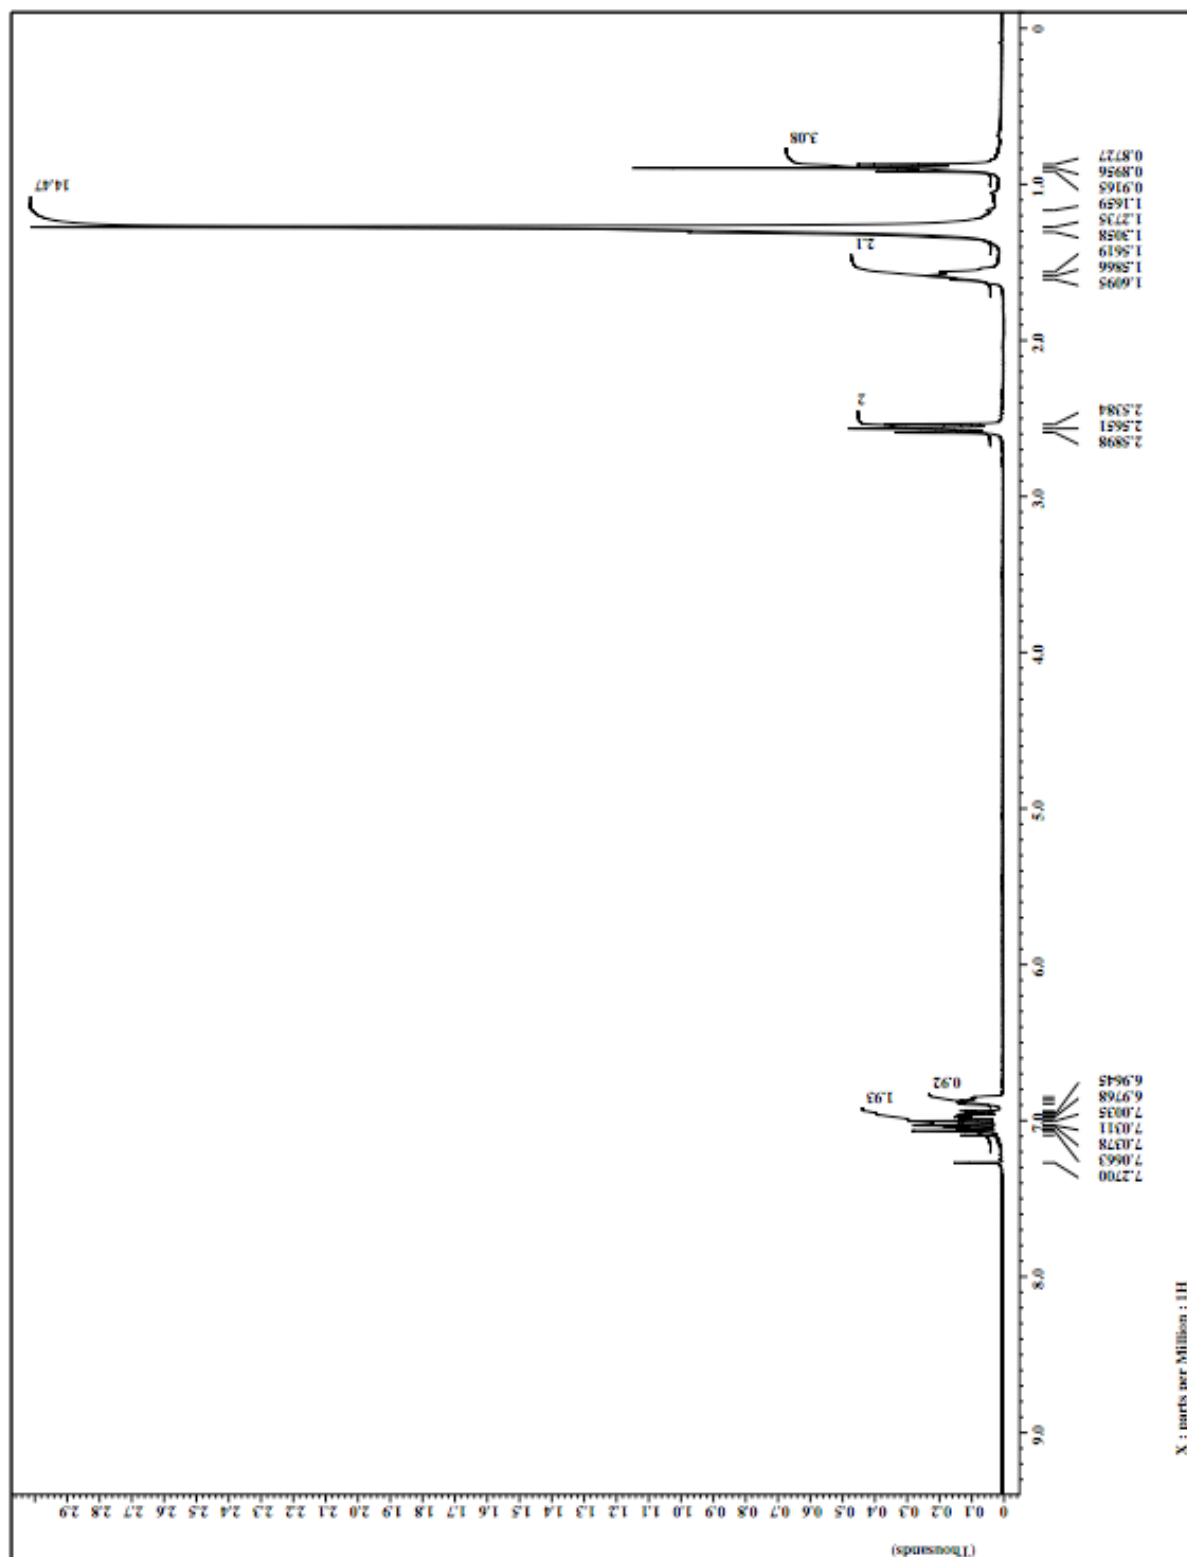

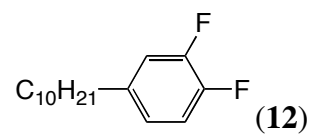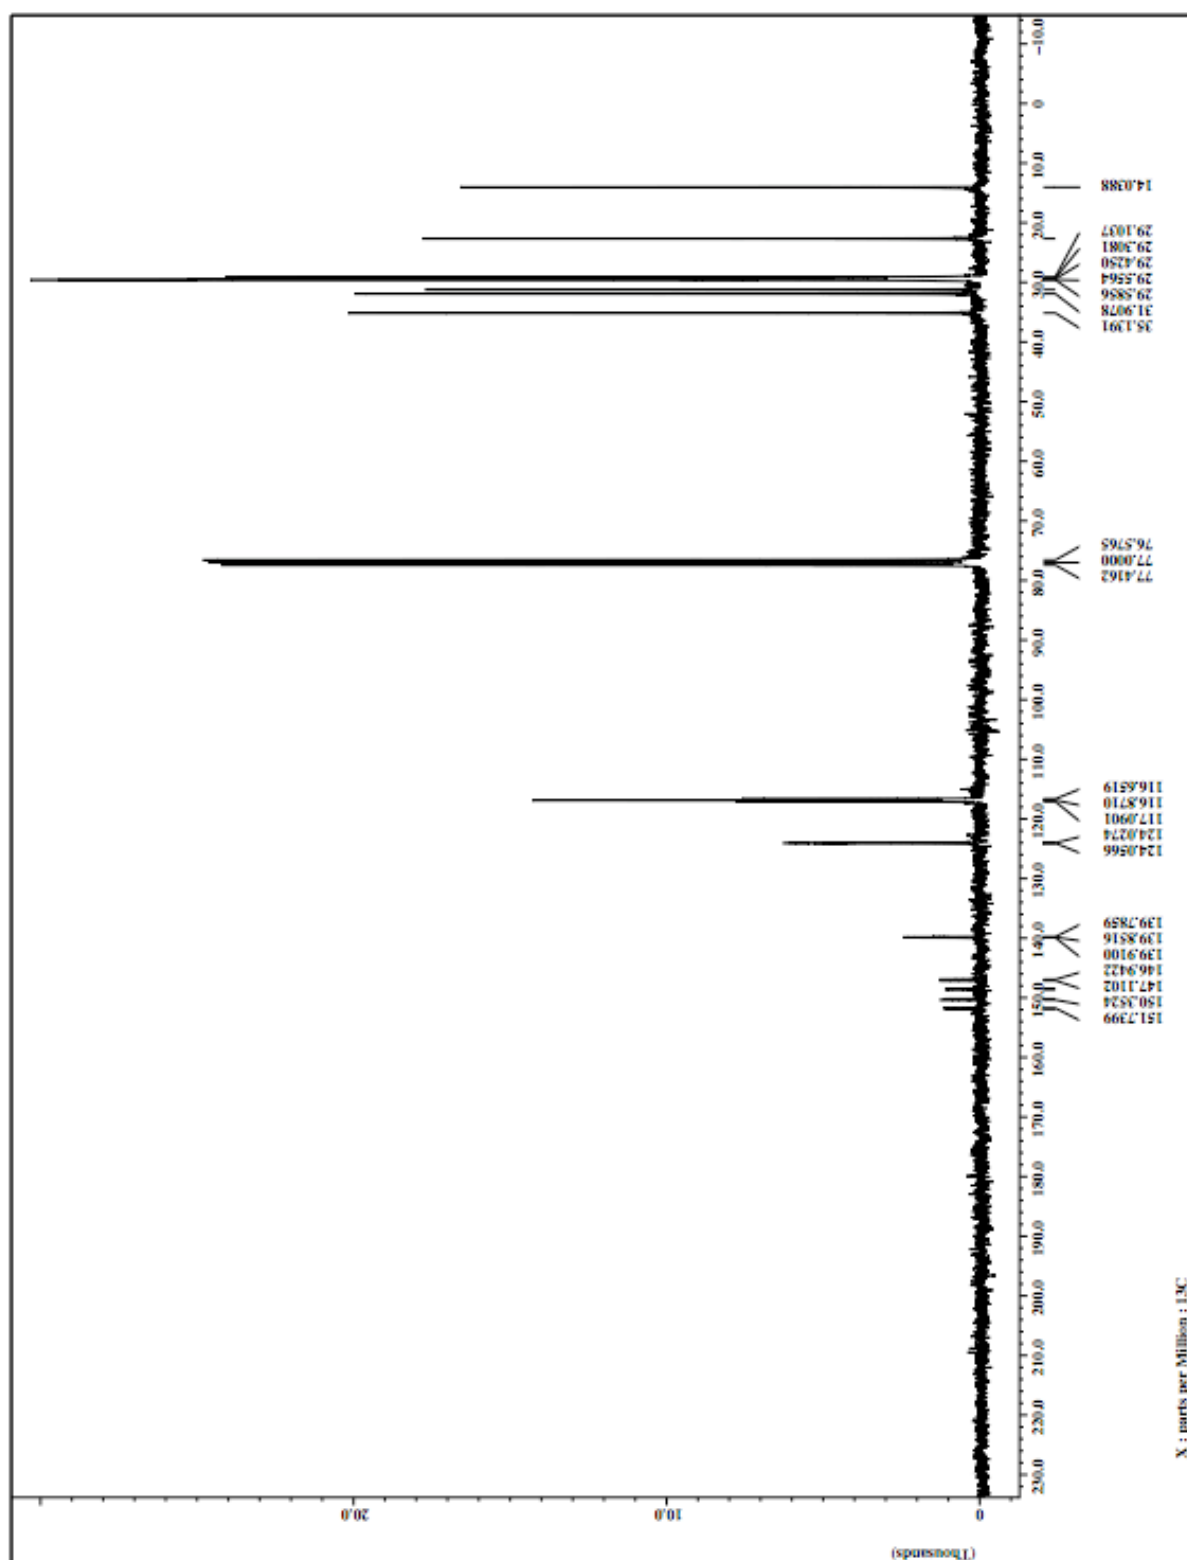

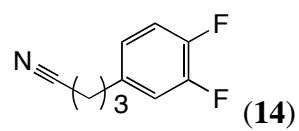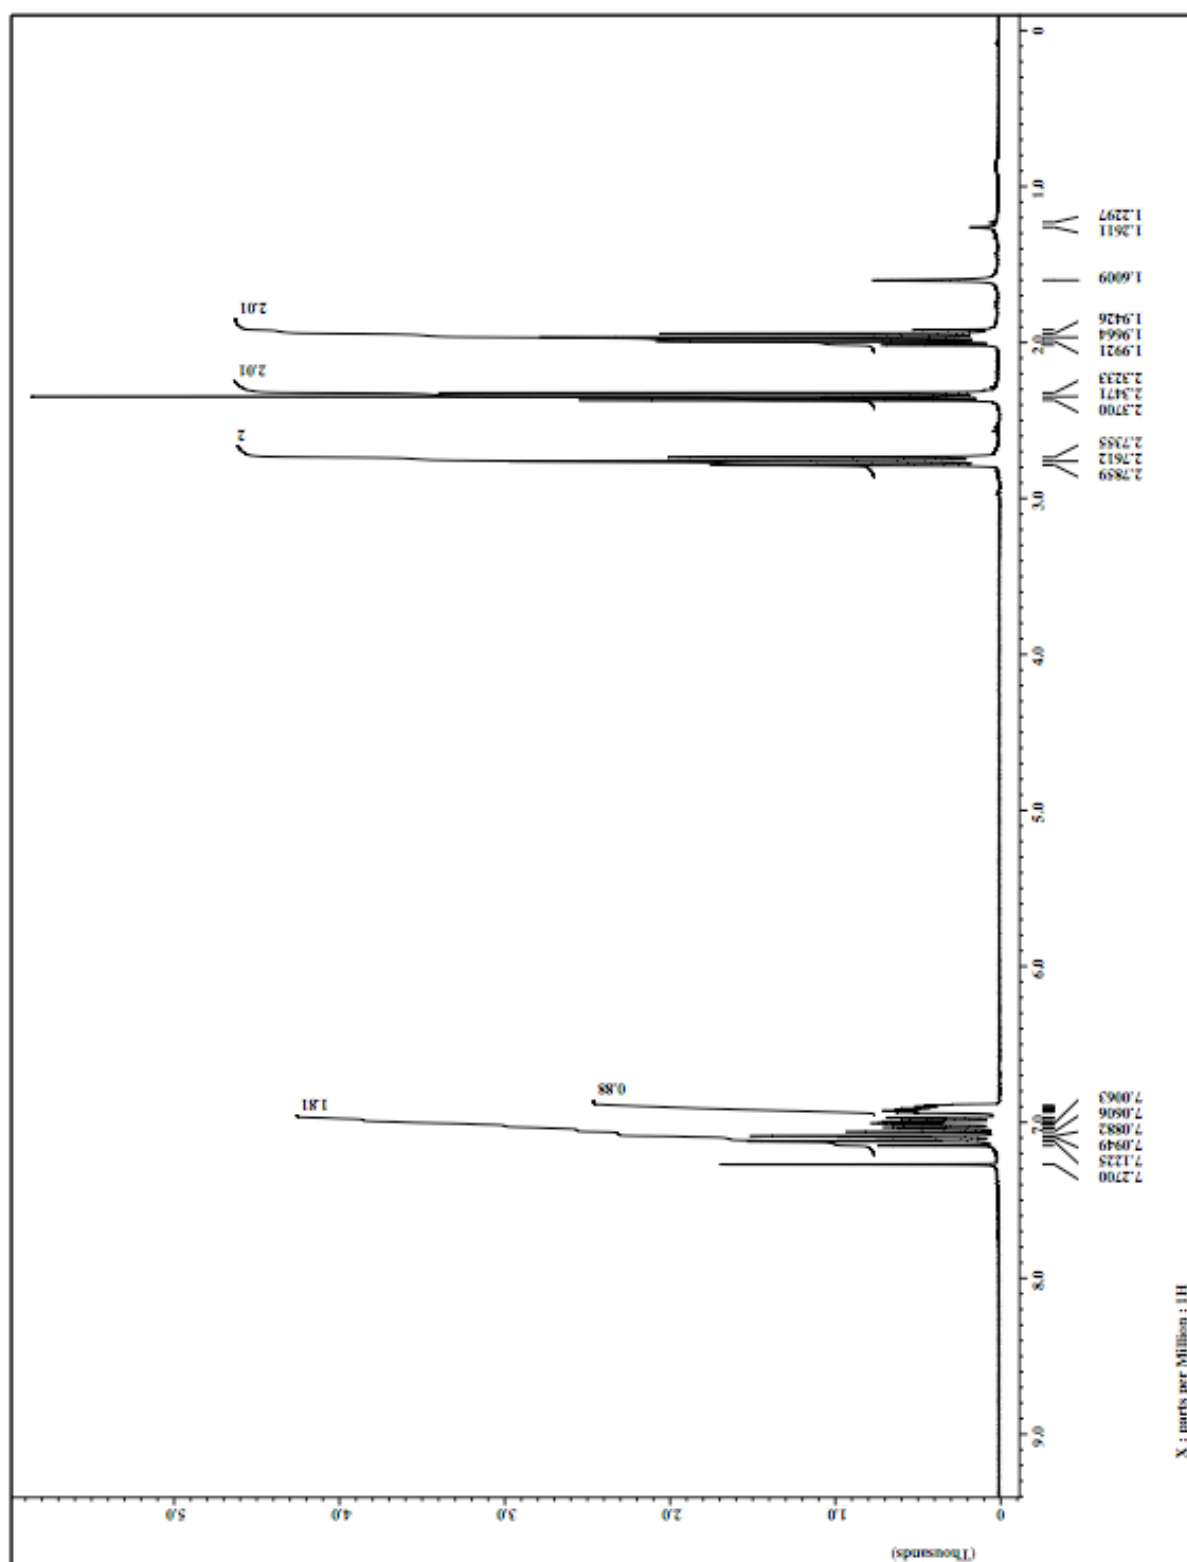

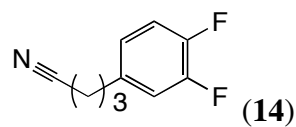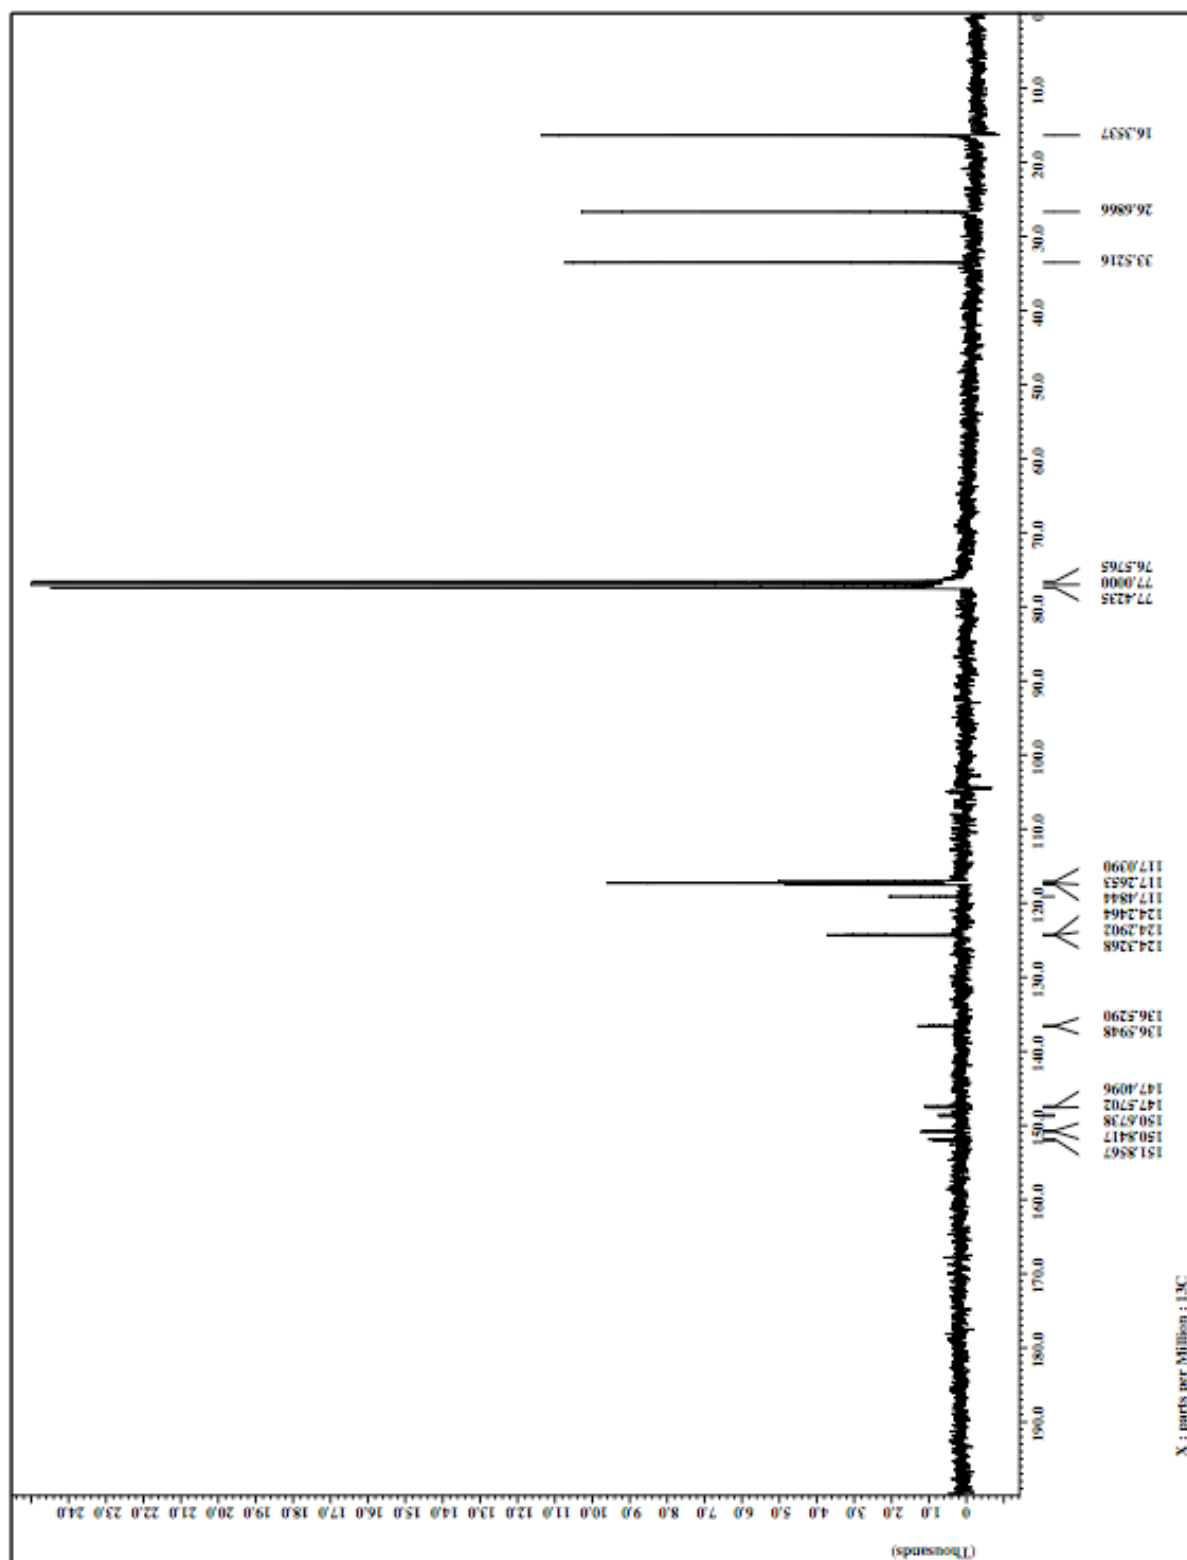

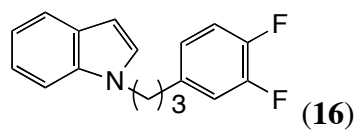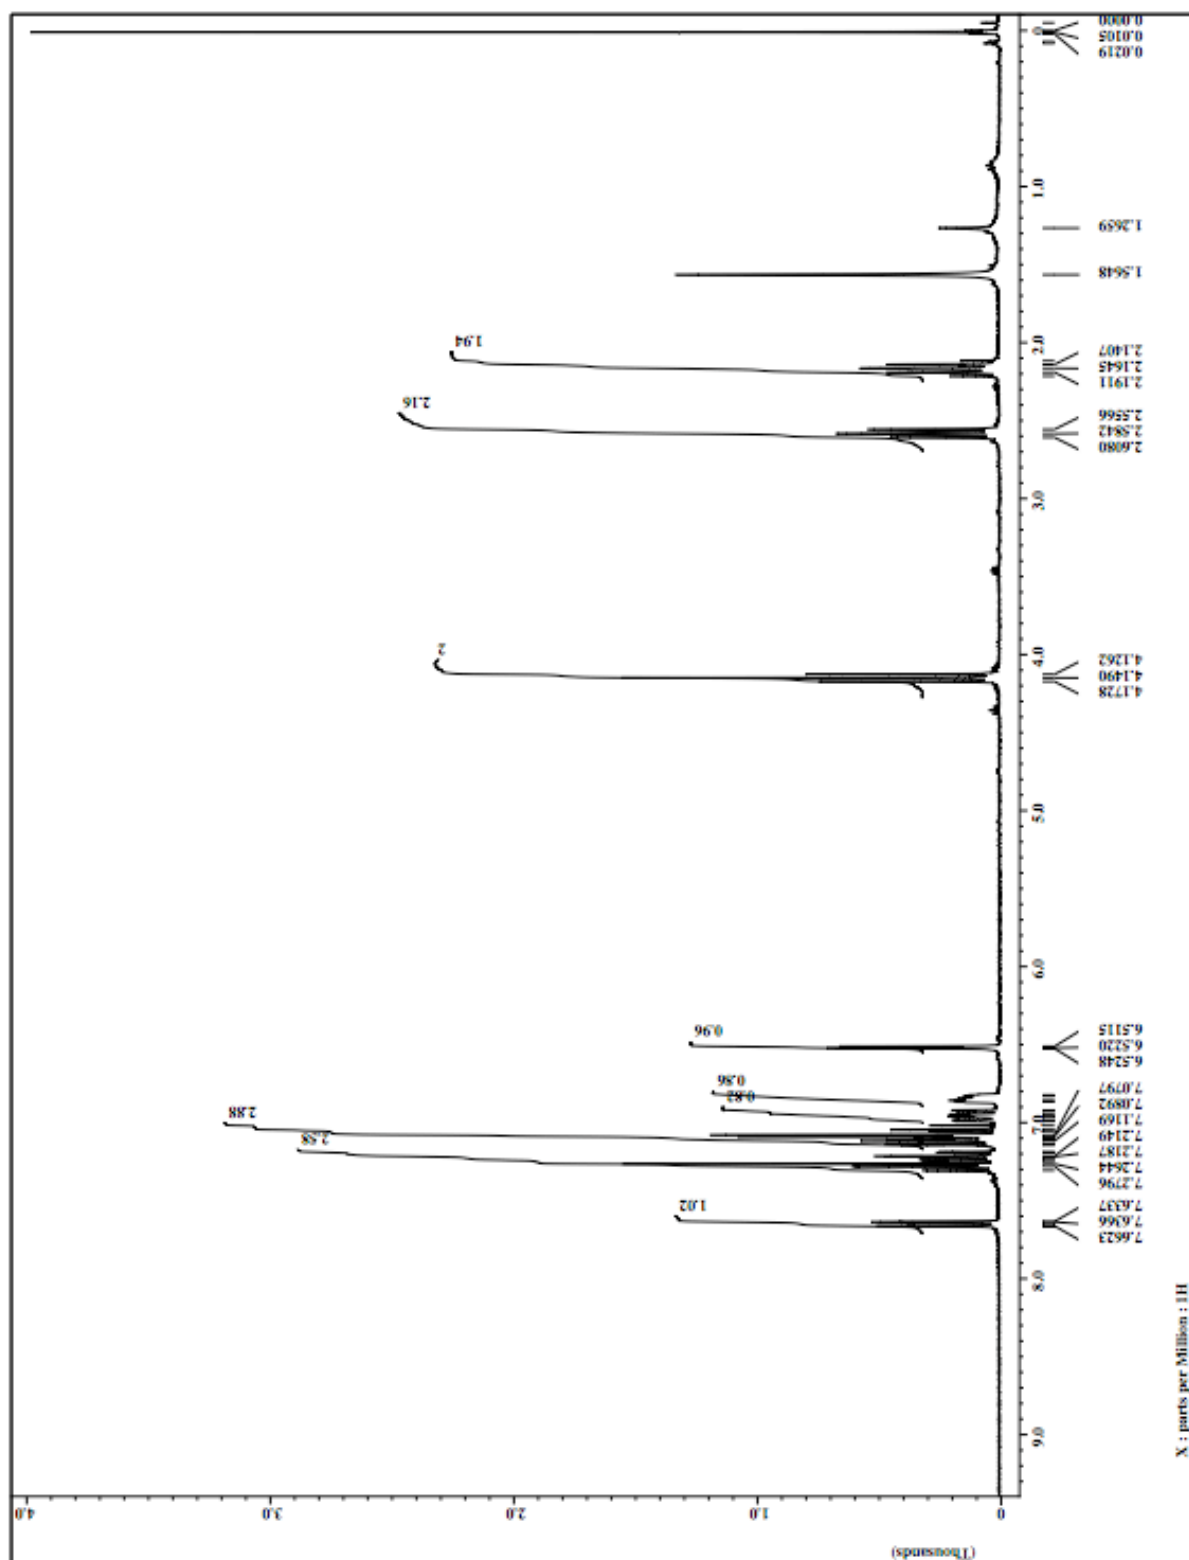

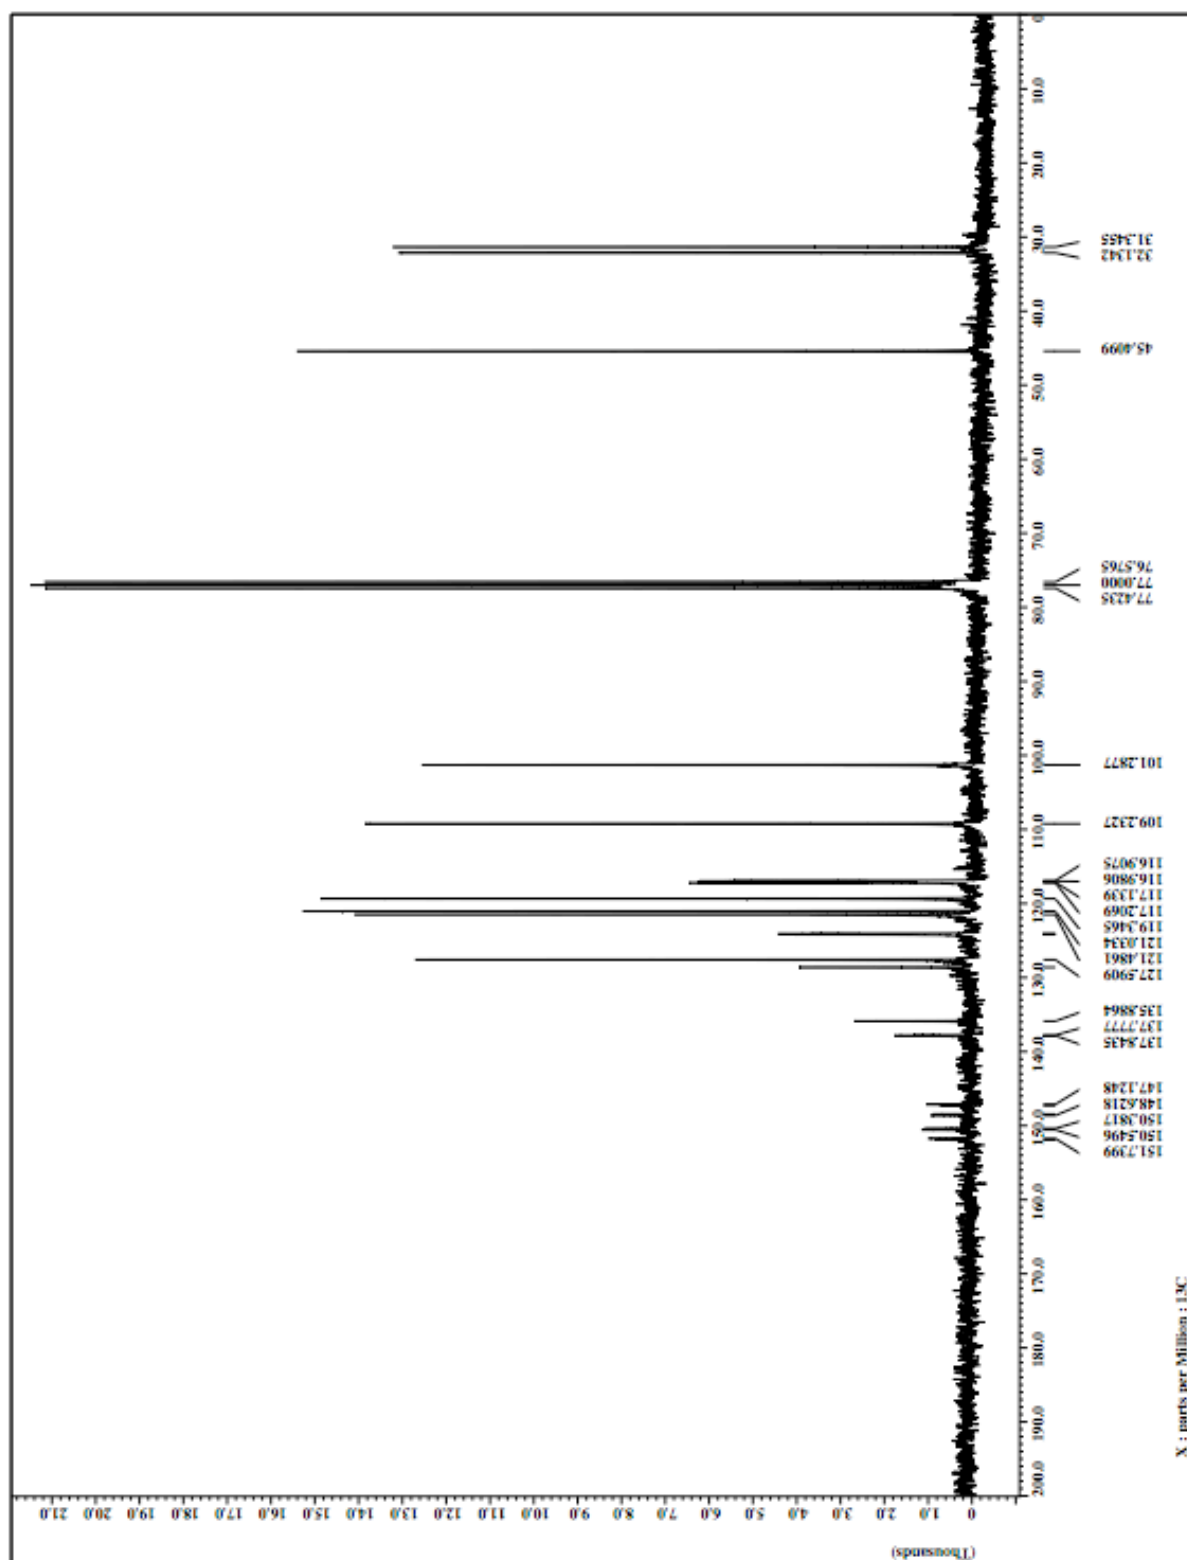

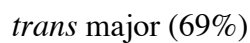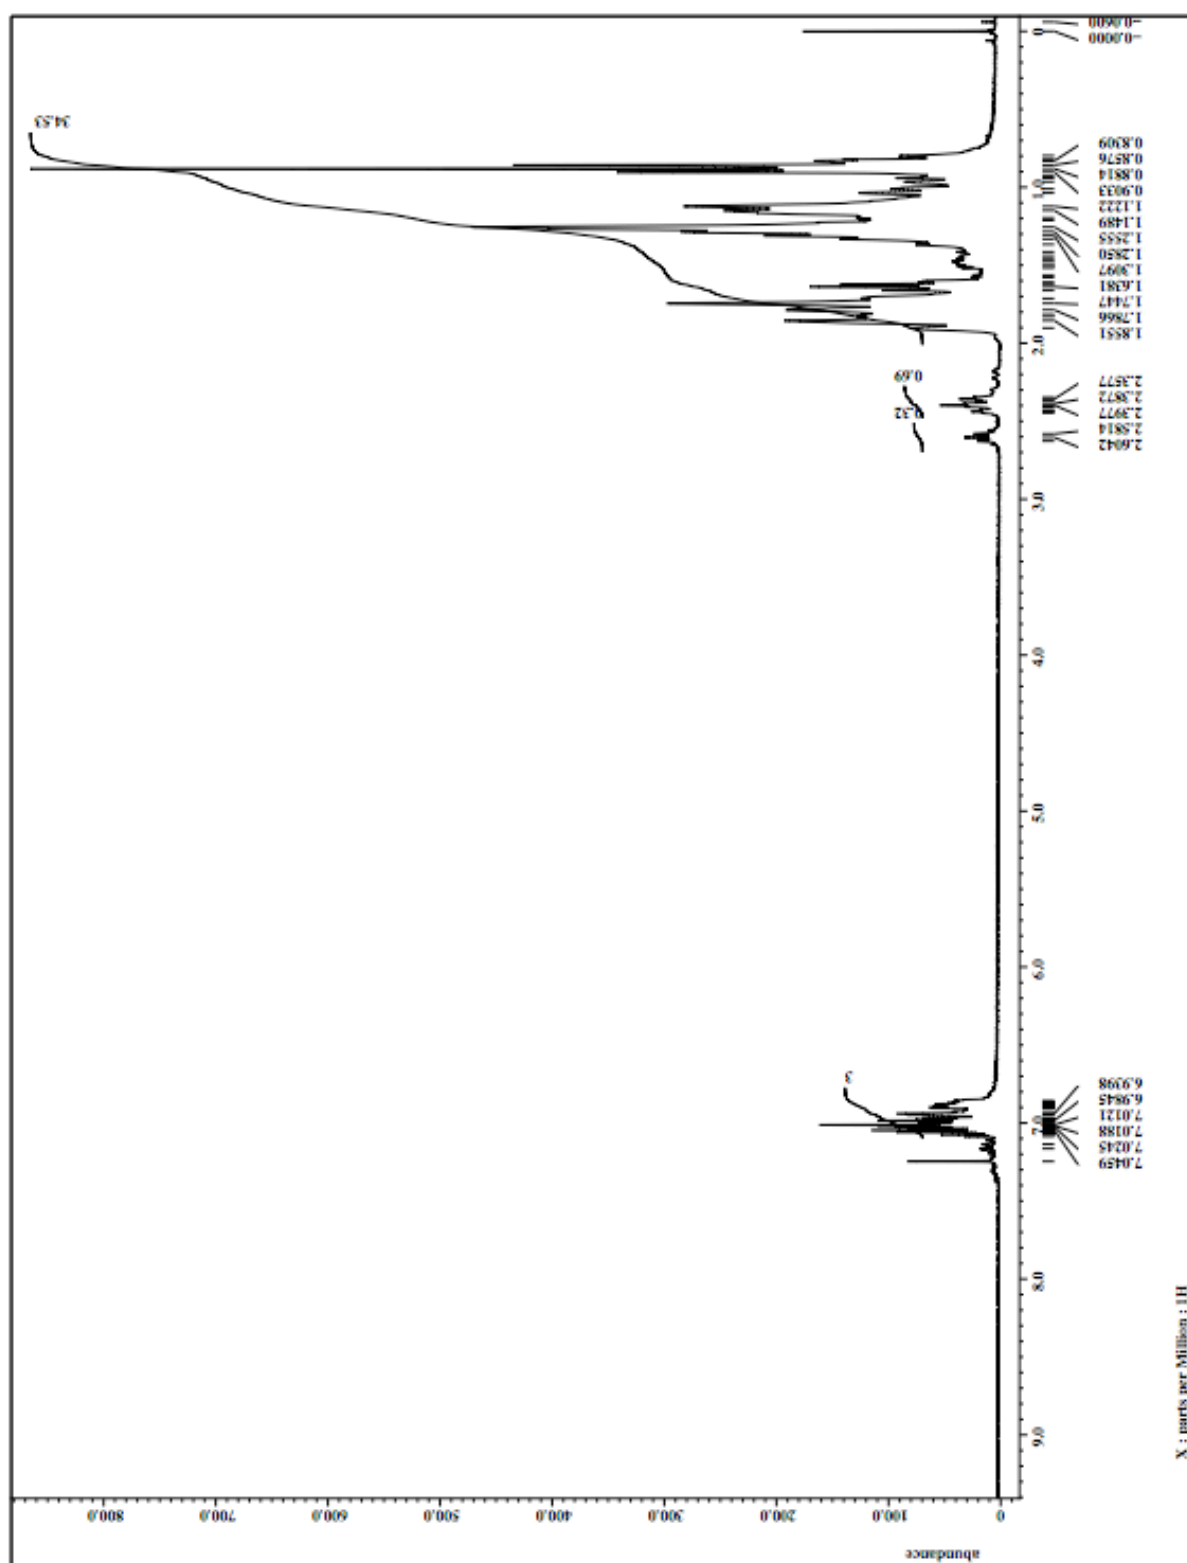



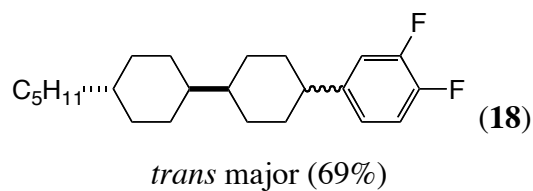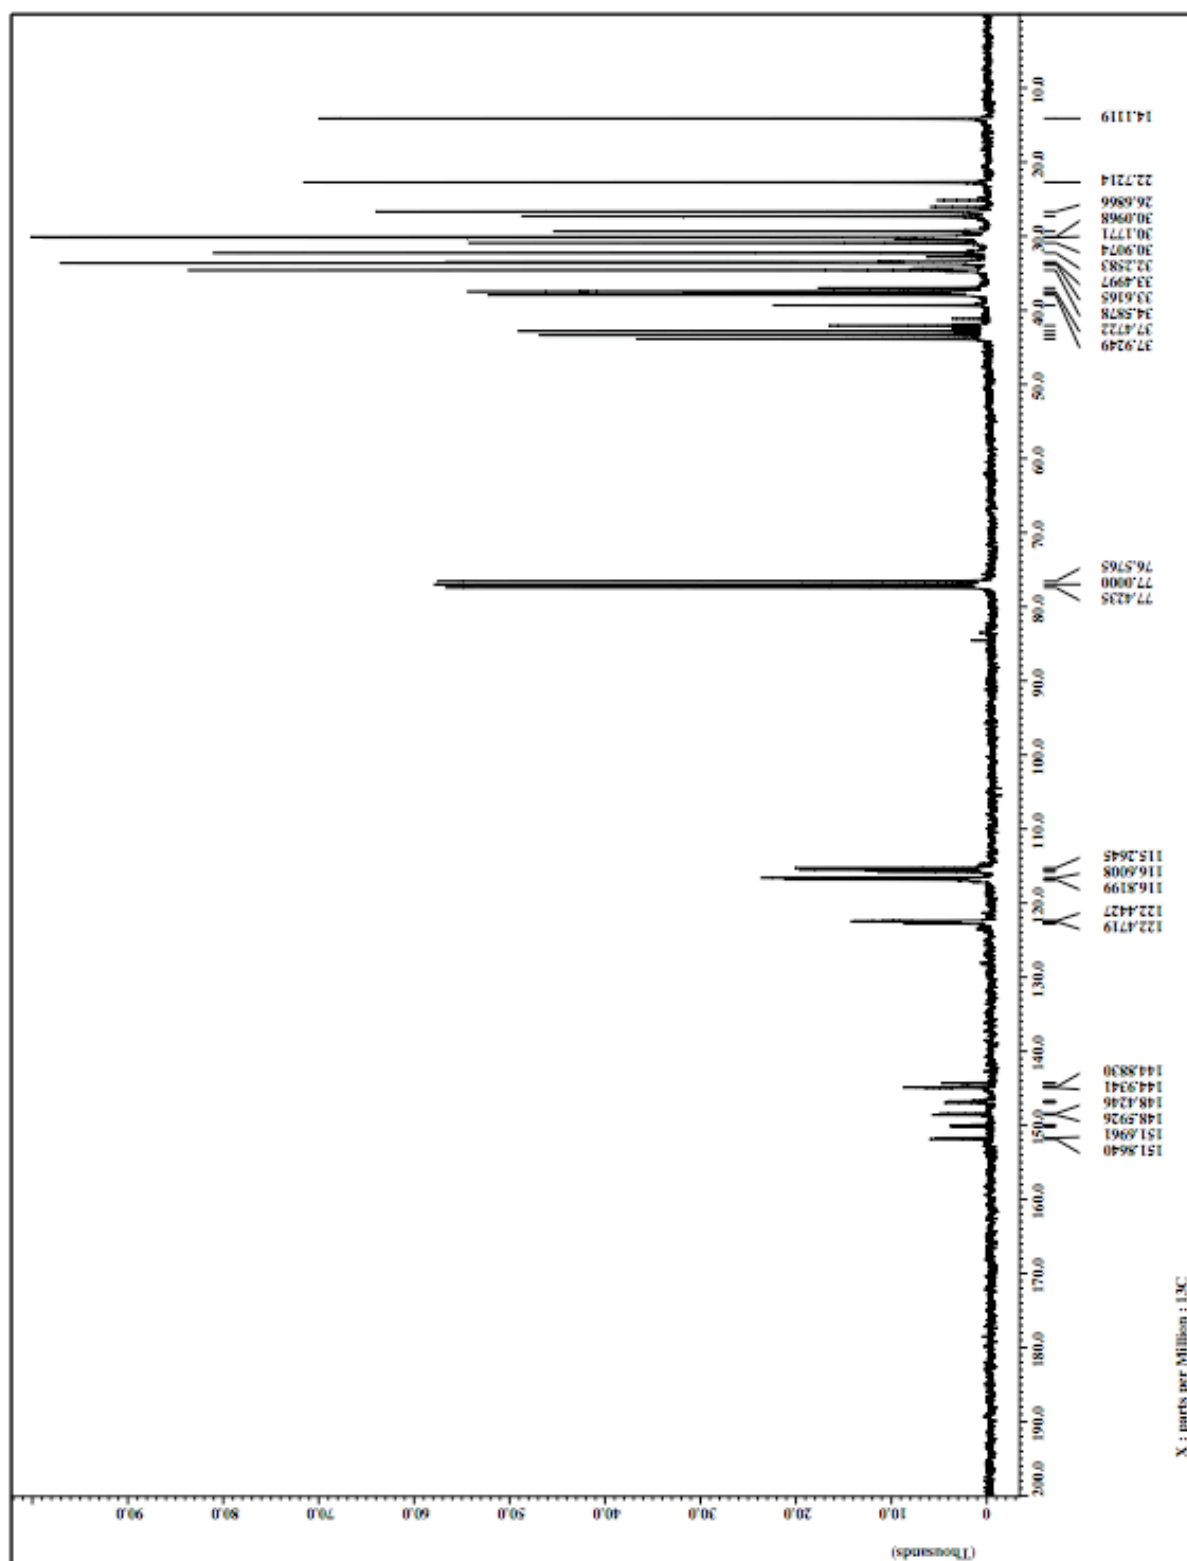

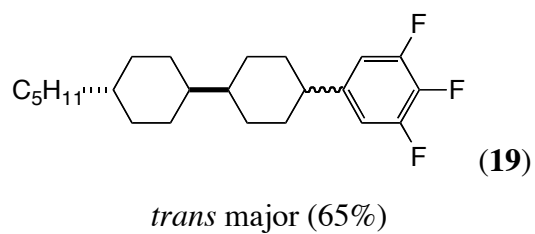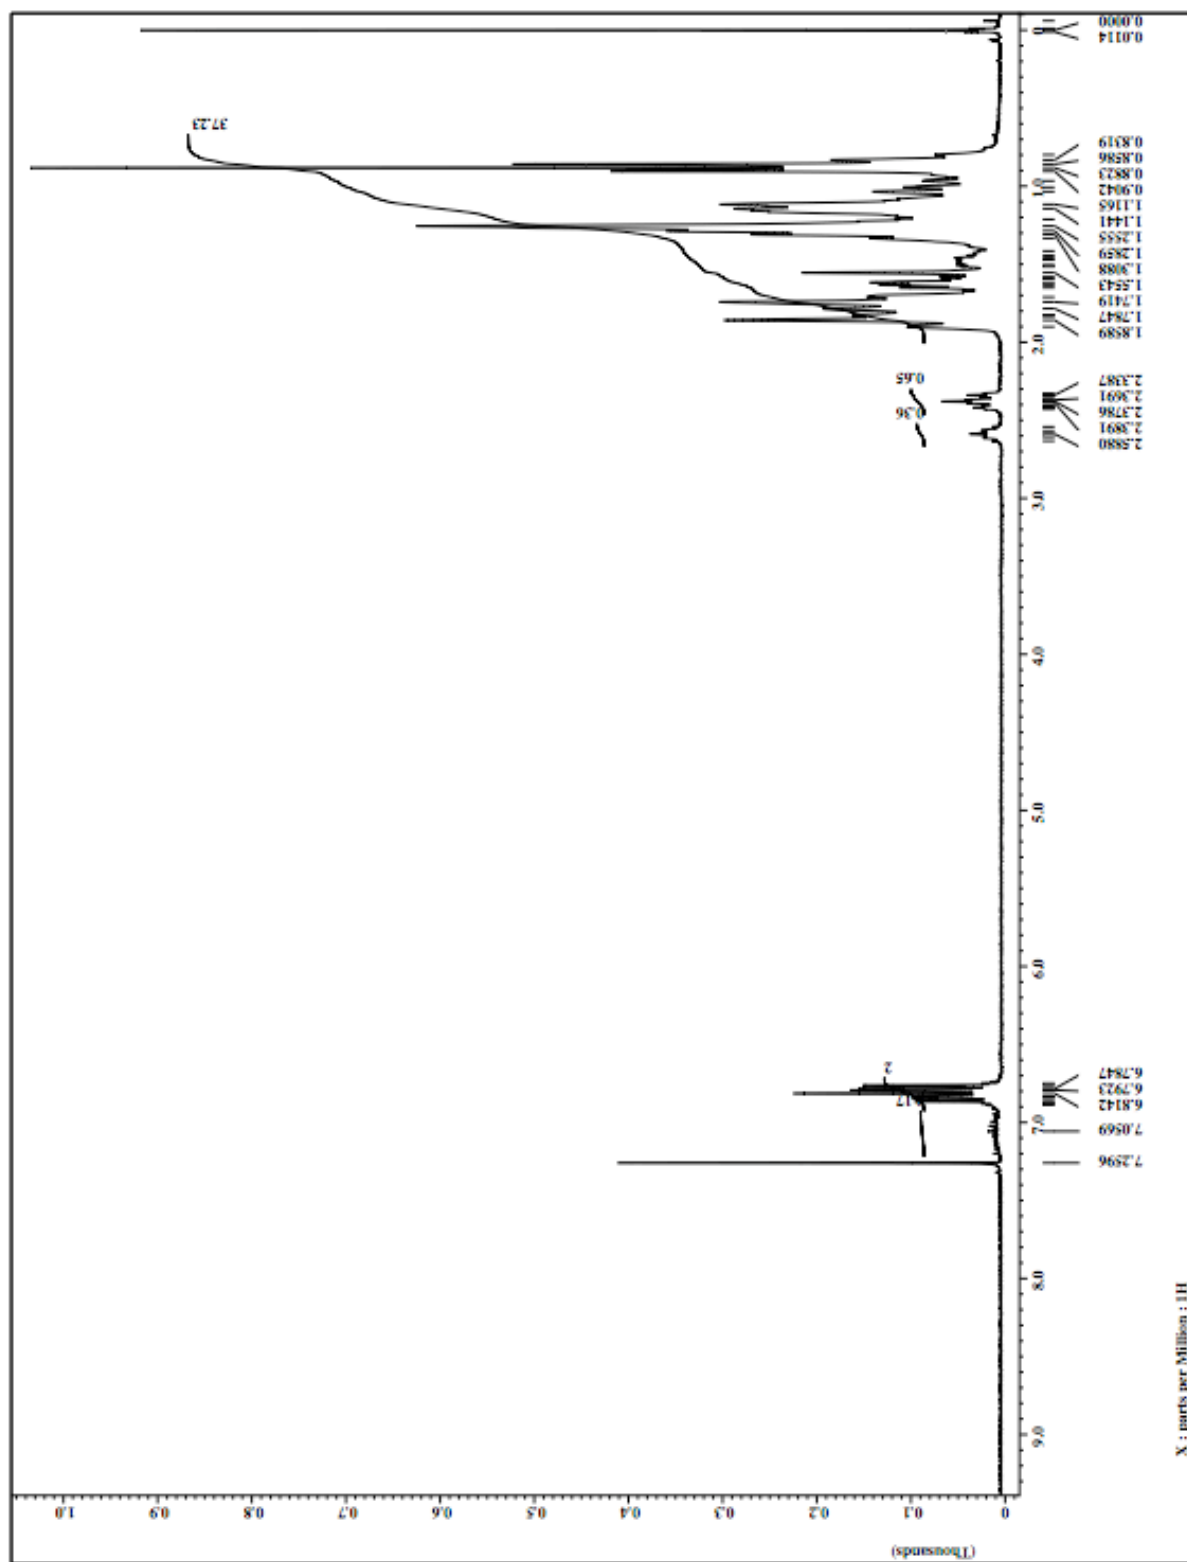

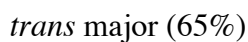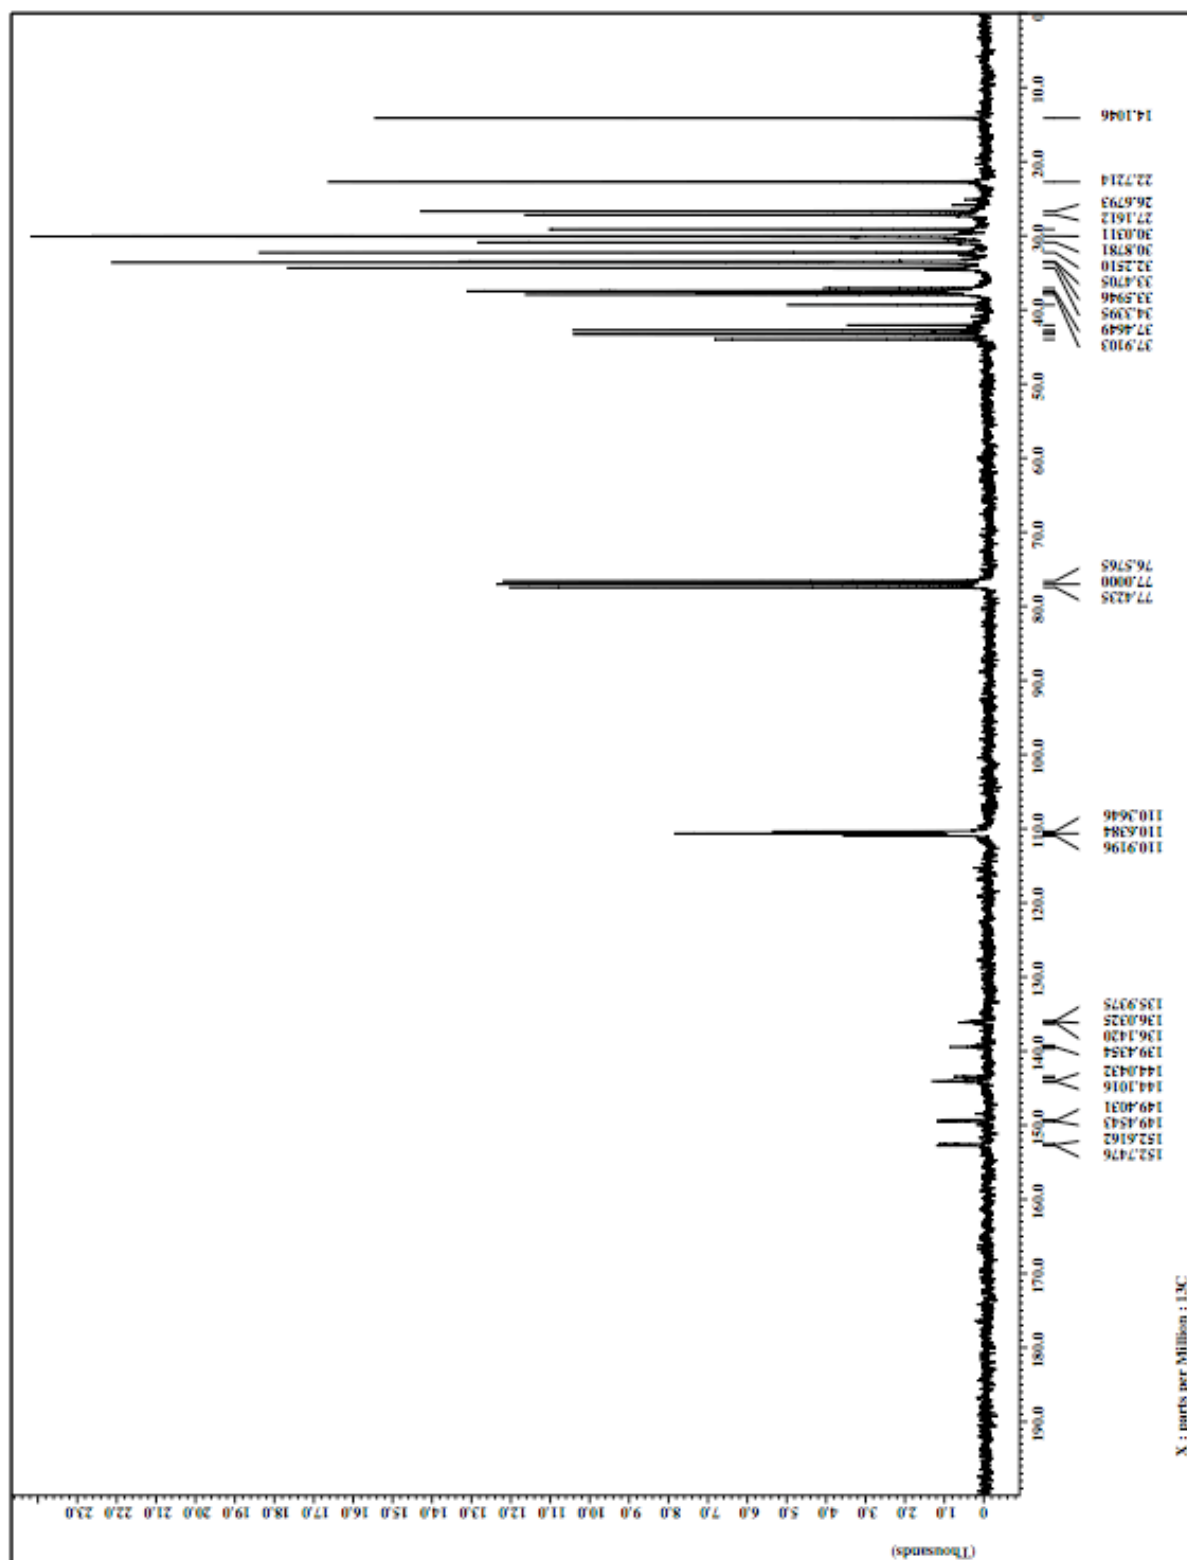

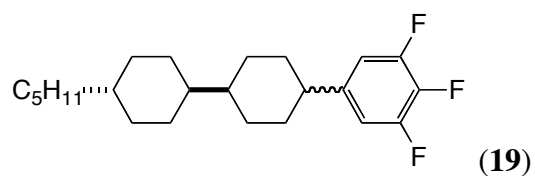

*trans* major (> 95%)

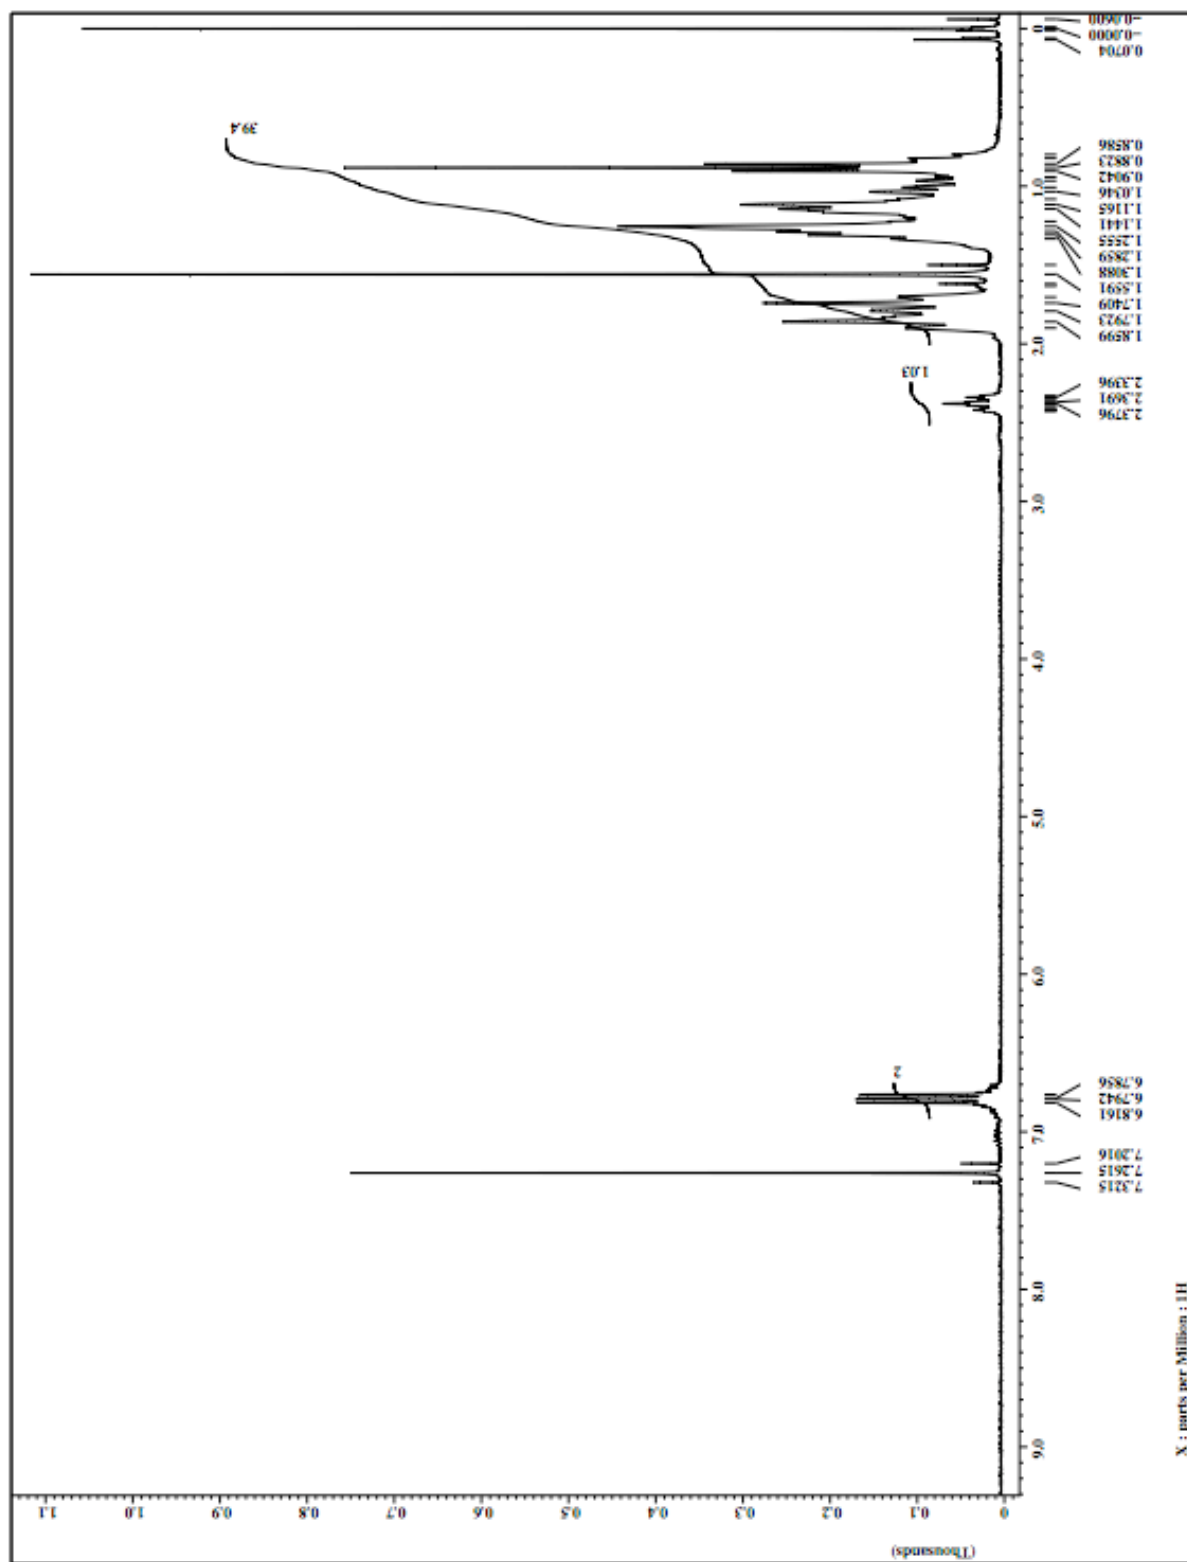

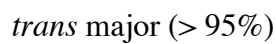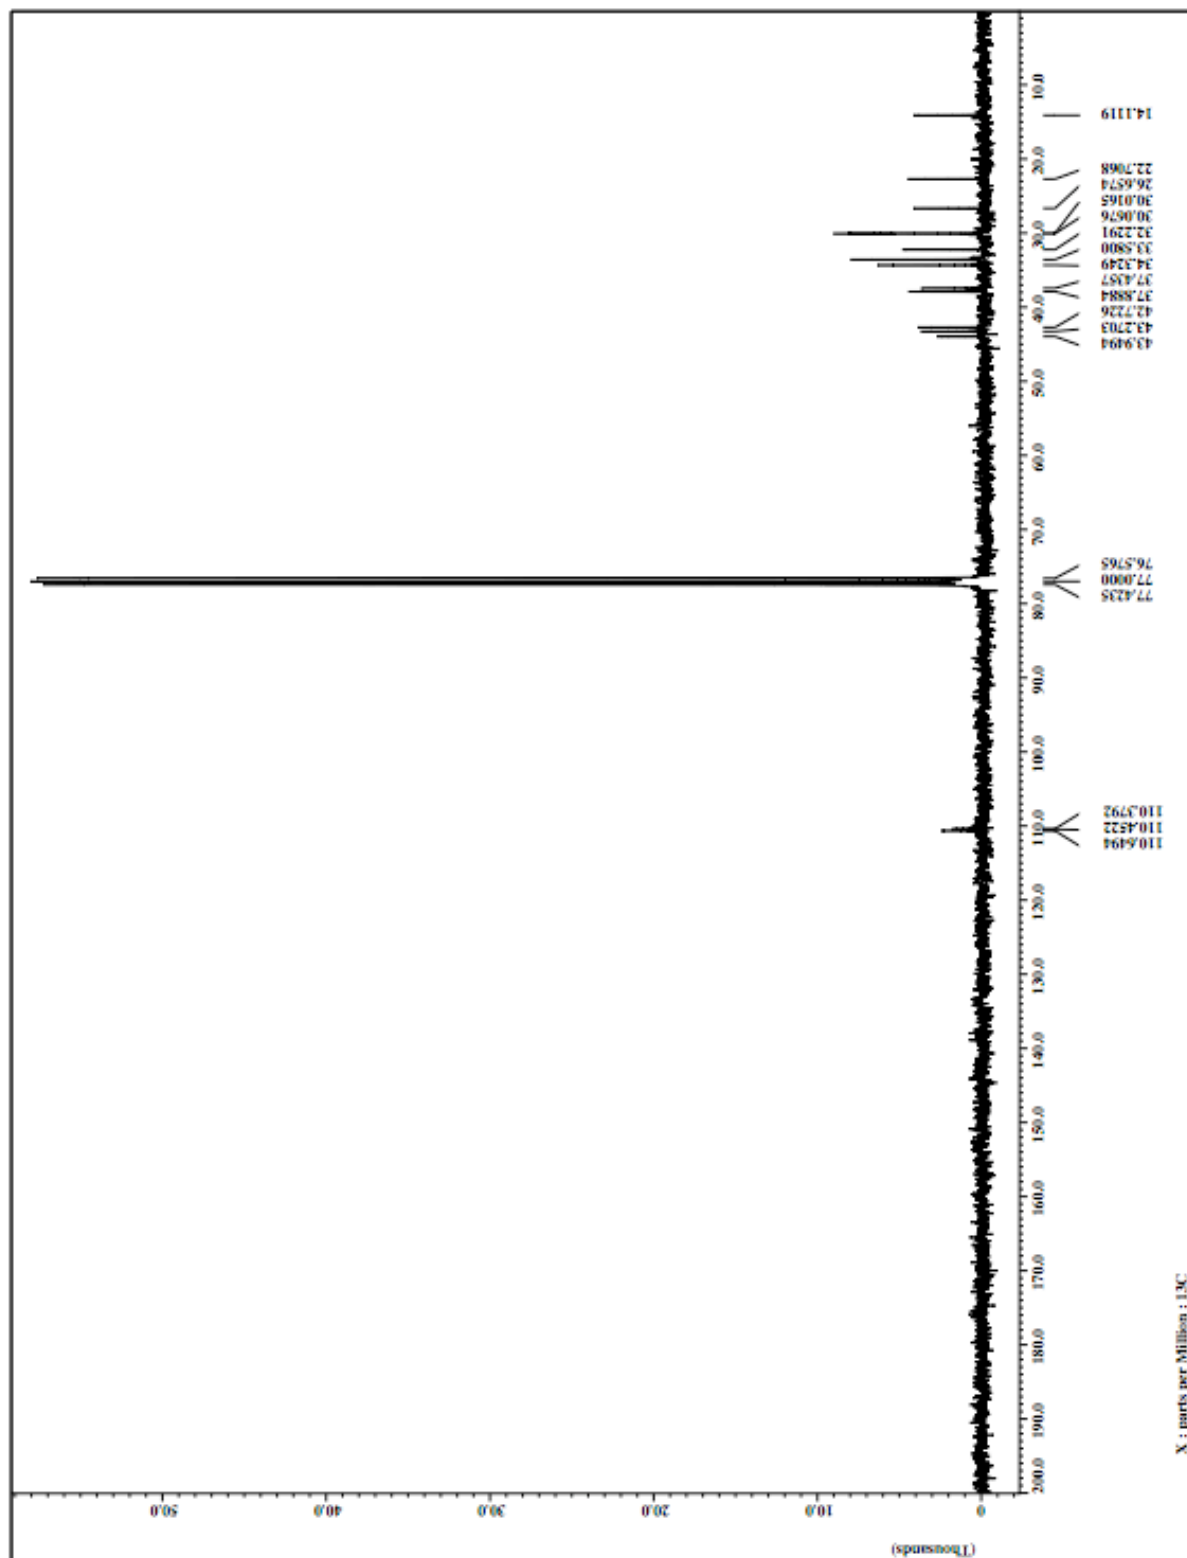

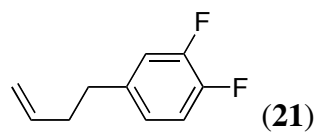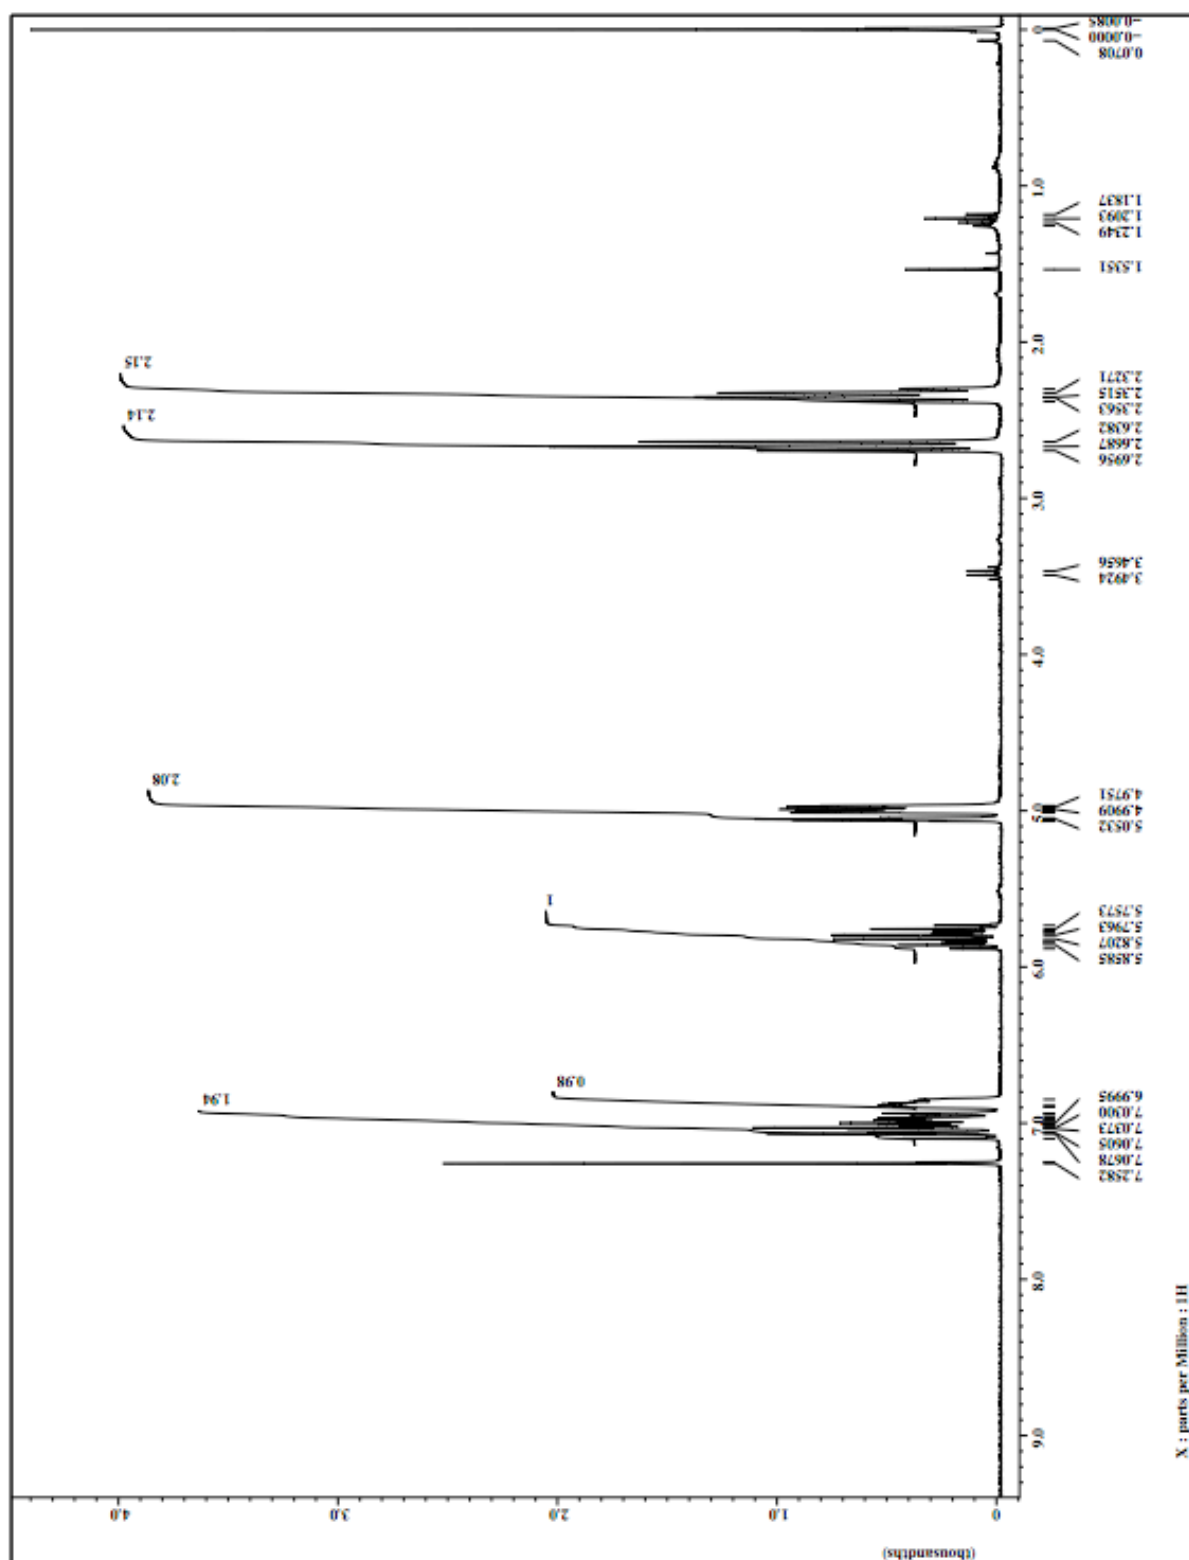

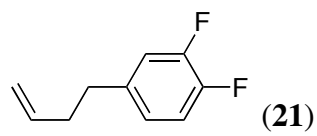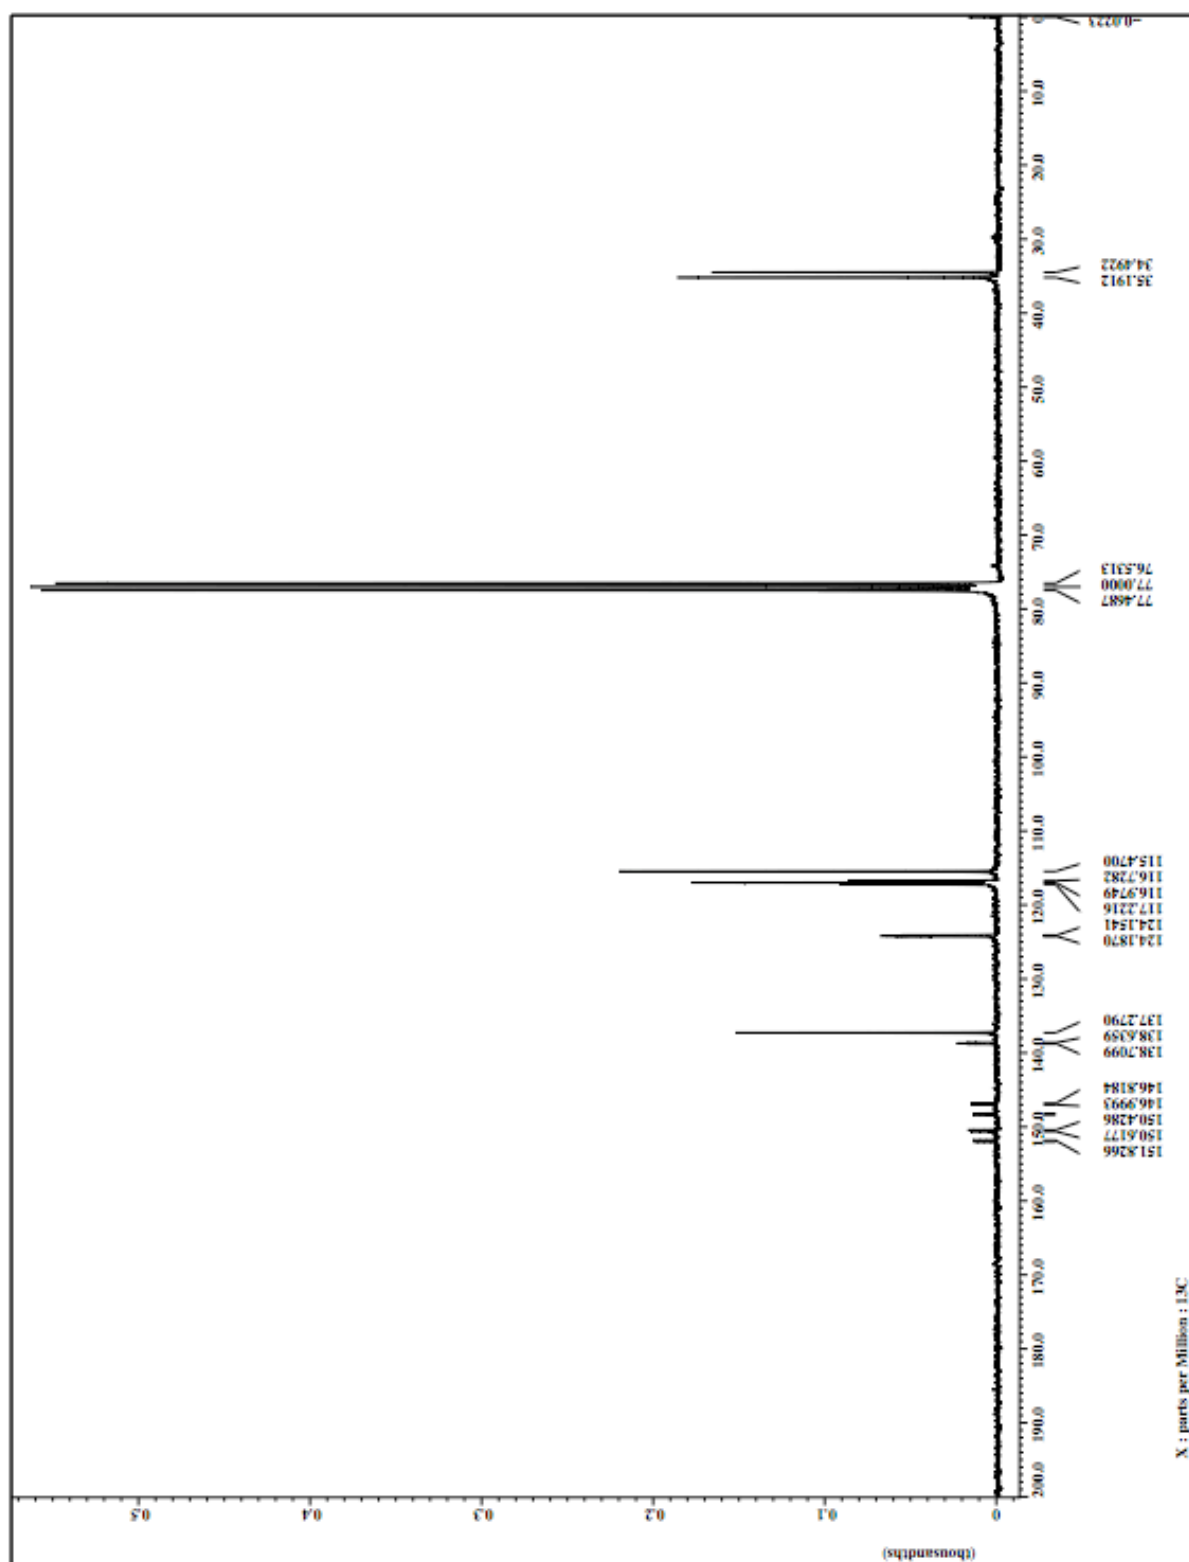

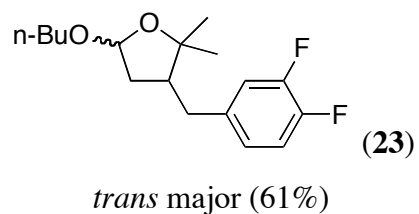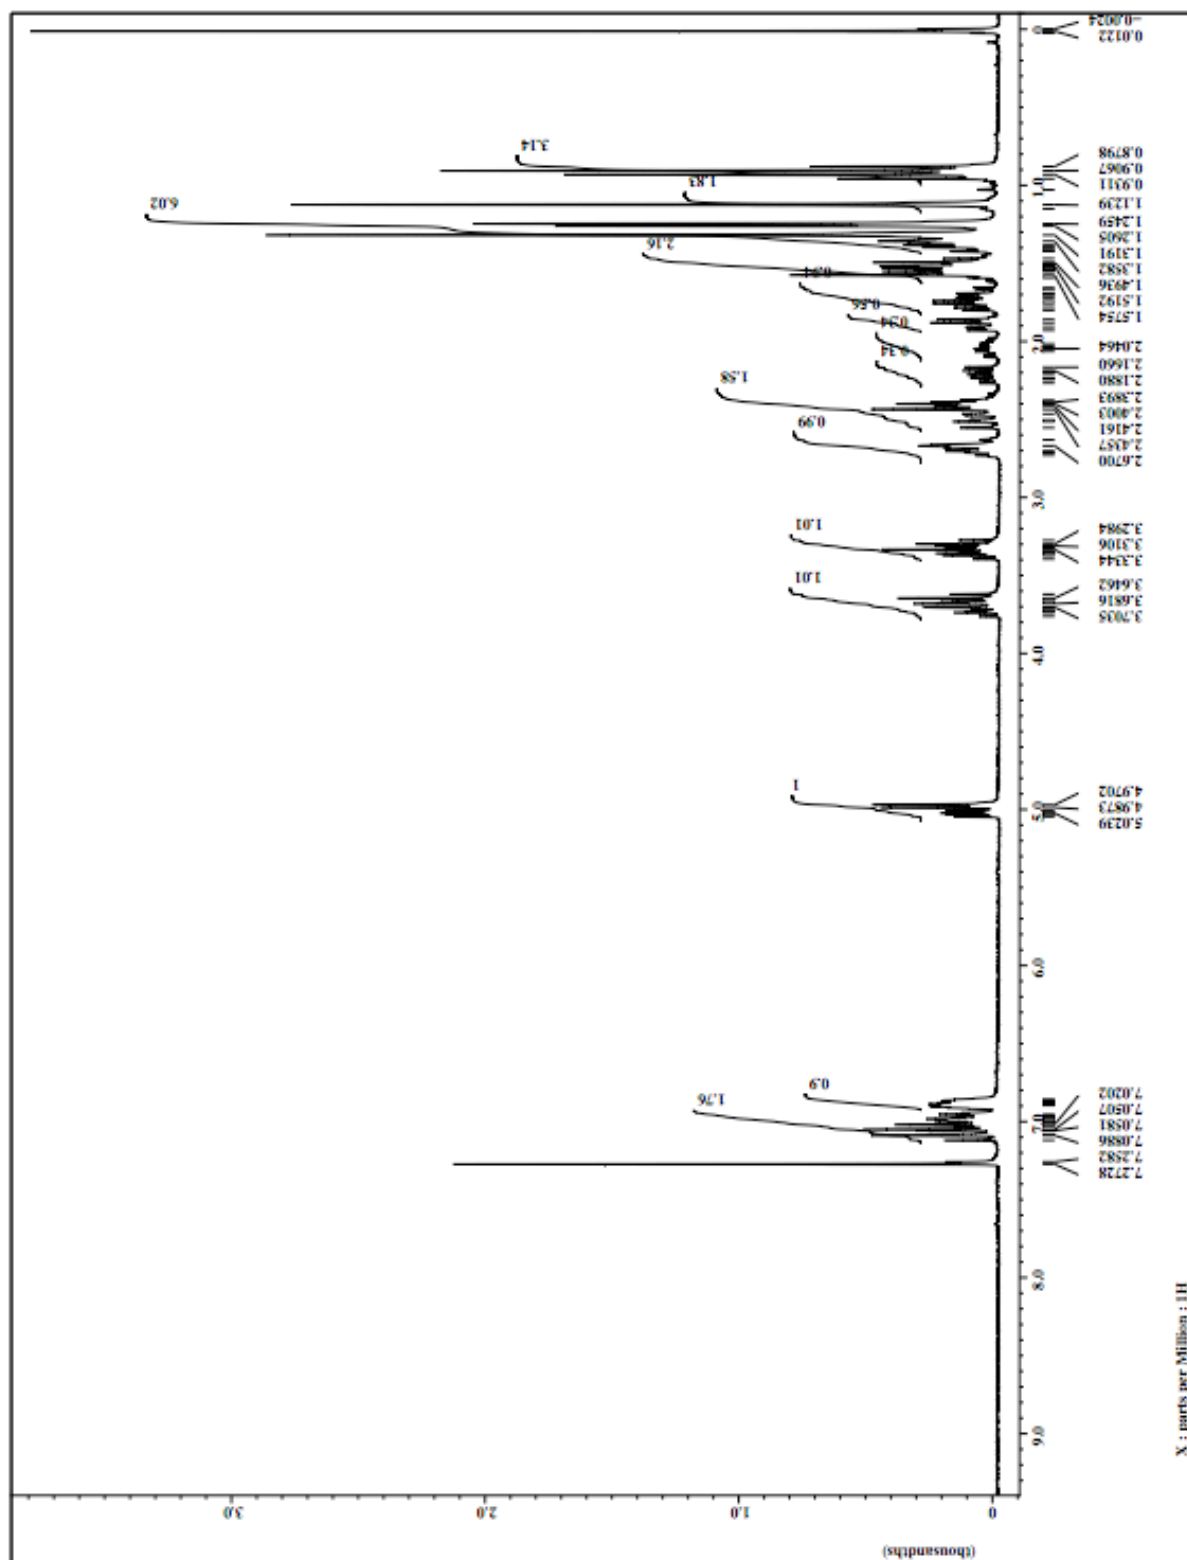



 (23)  
*trans* major (61%)

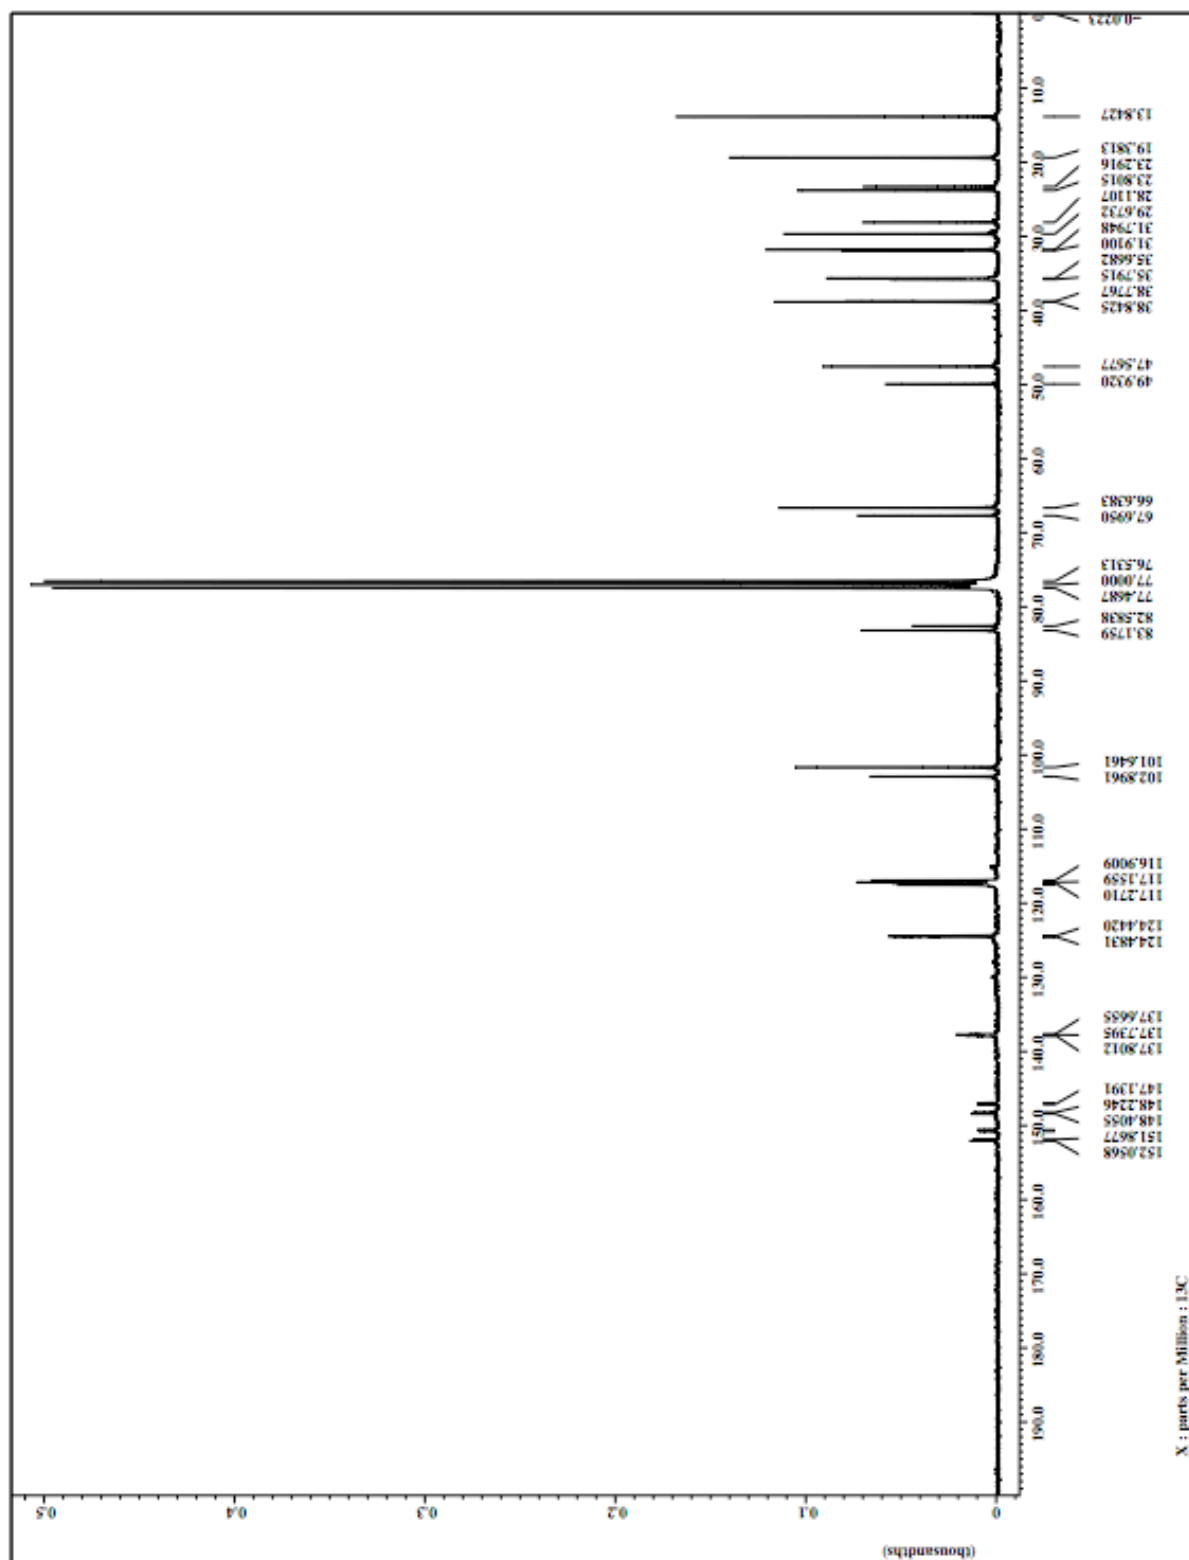

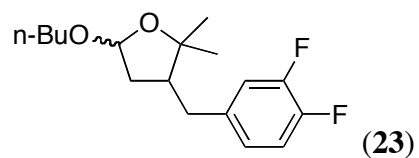

*trans* major (85%)

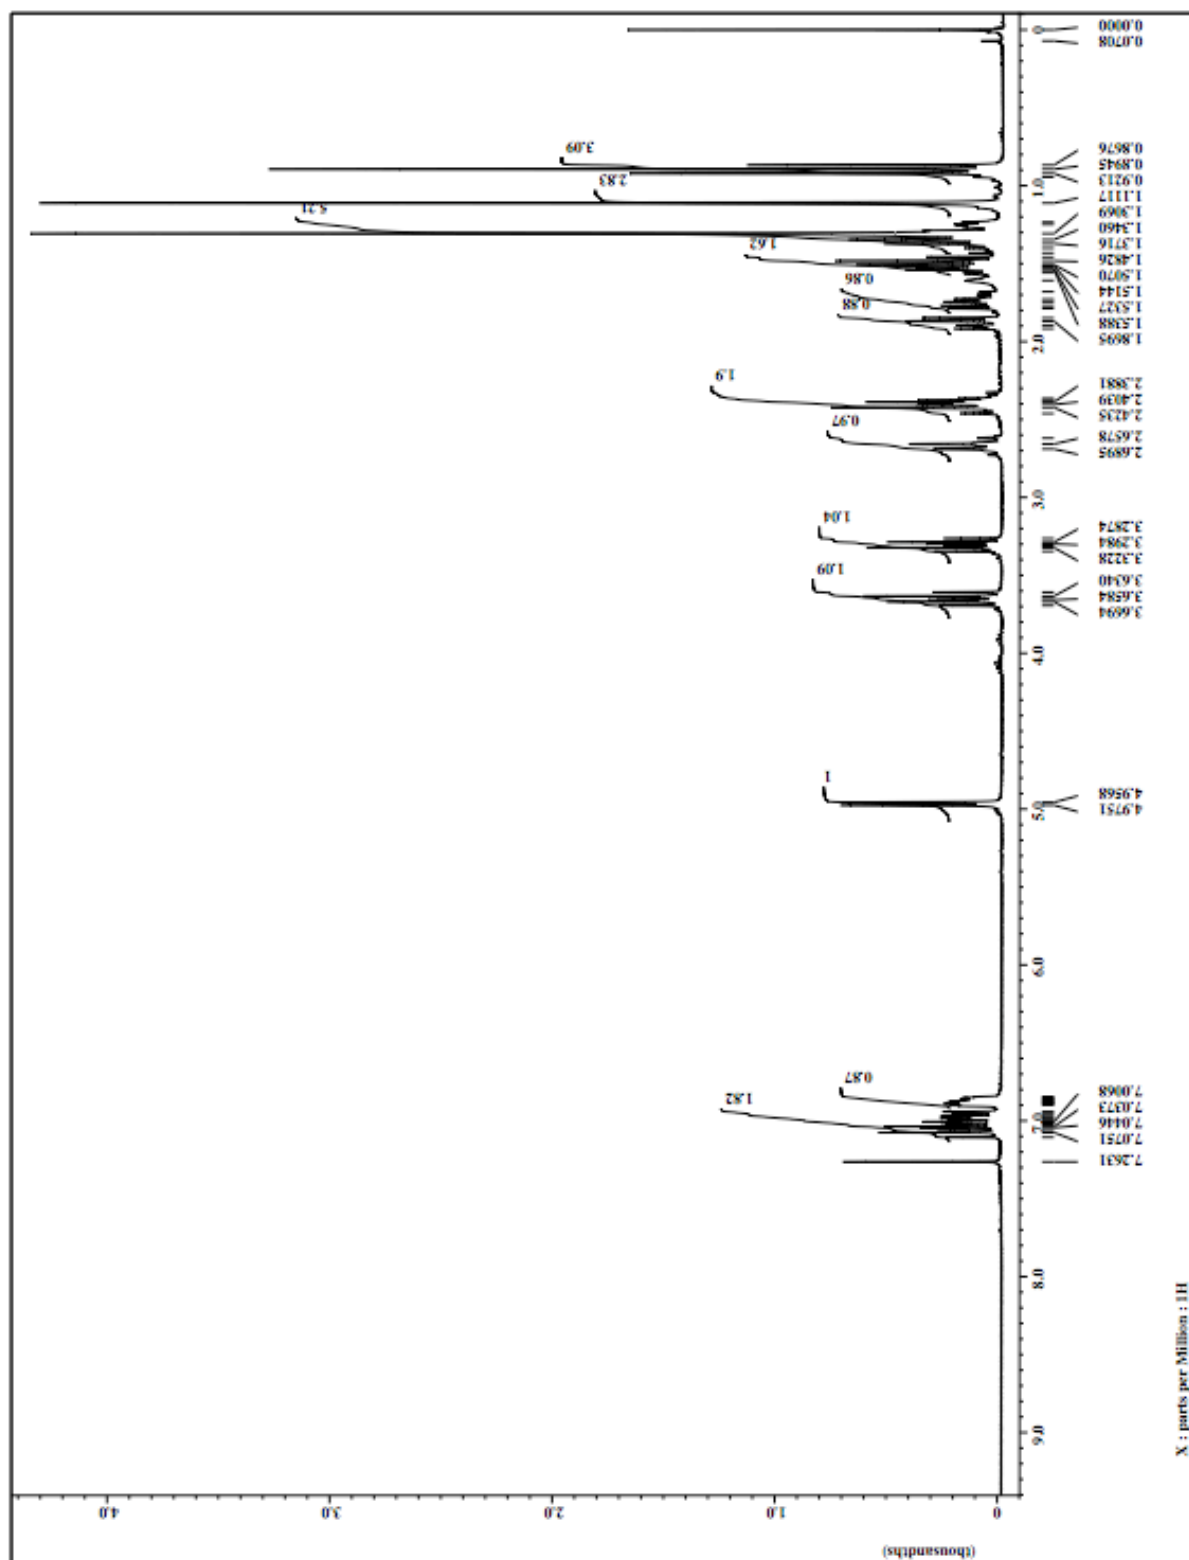

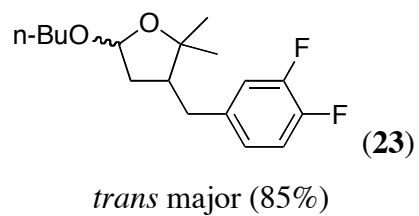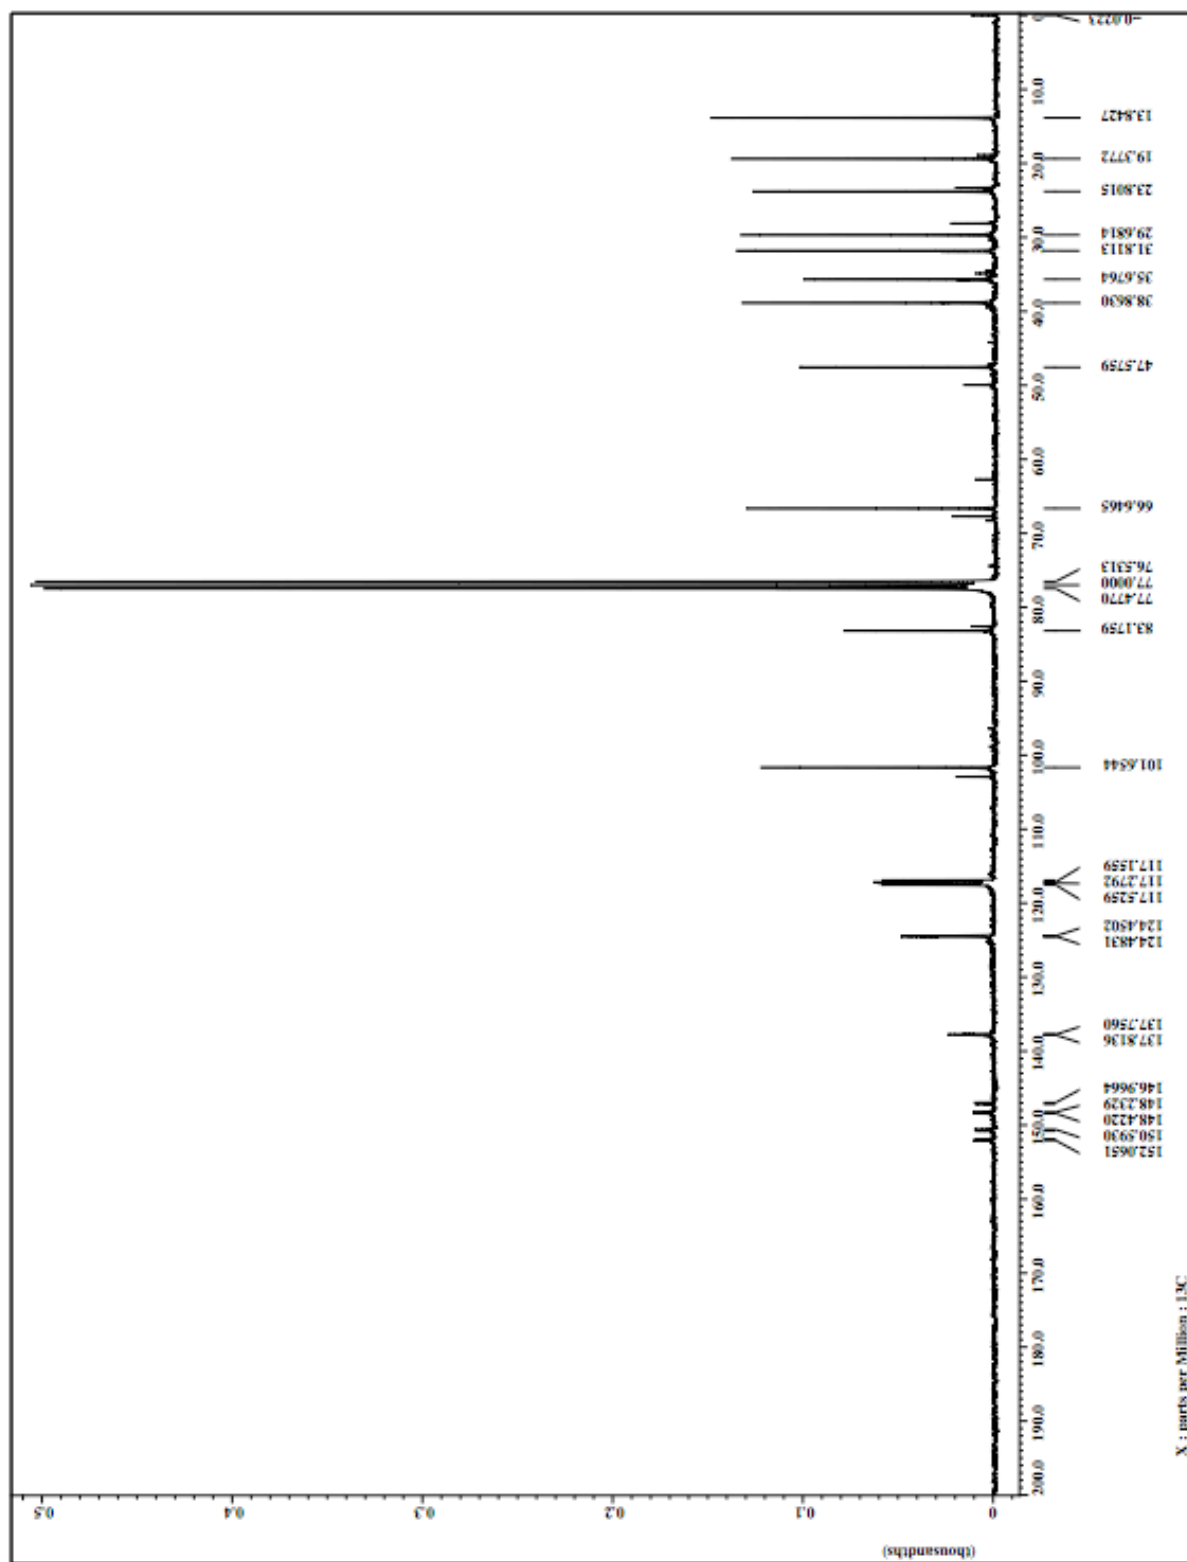

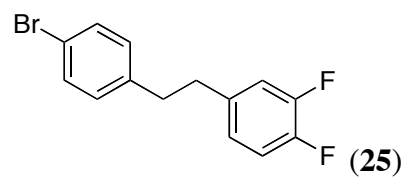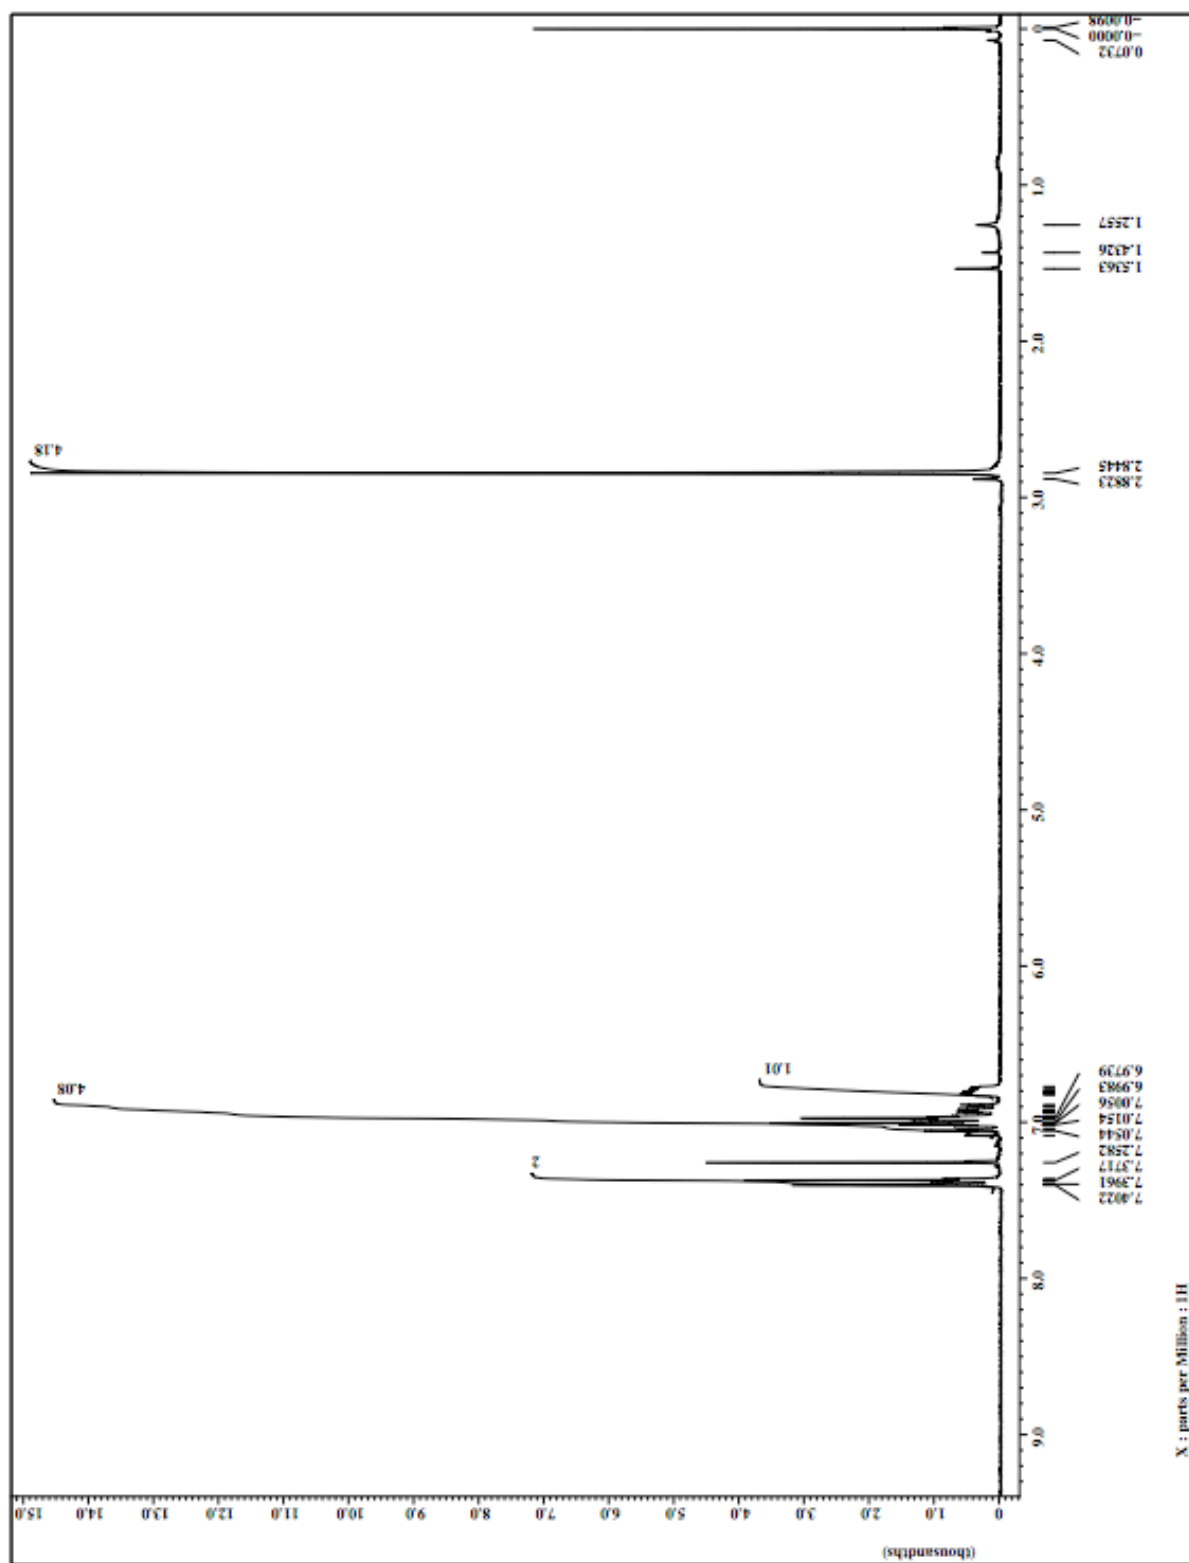

BrC1=CC=C(C=C1)CCc2cc(F)c(F)cc2 (25)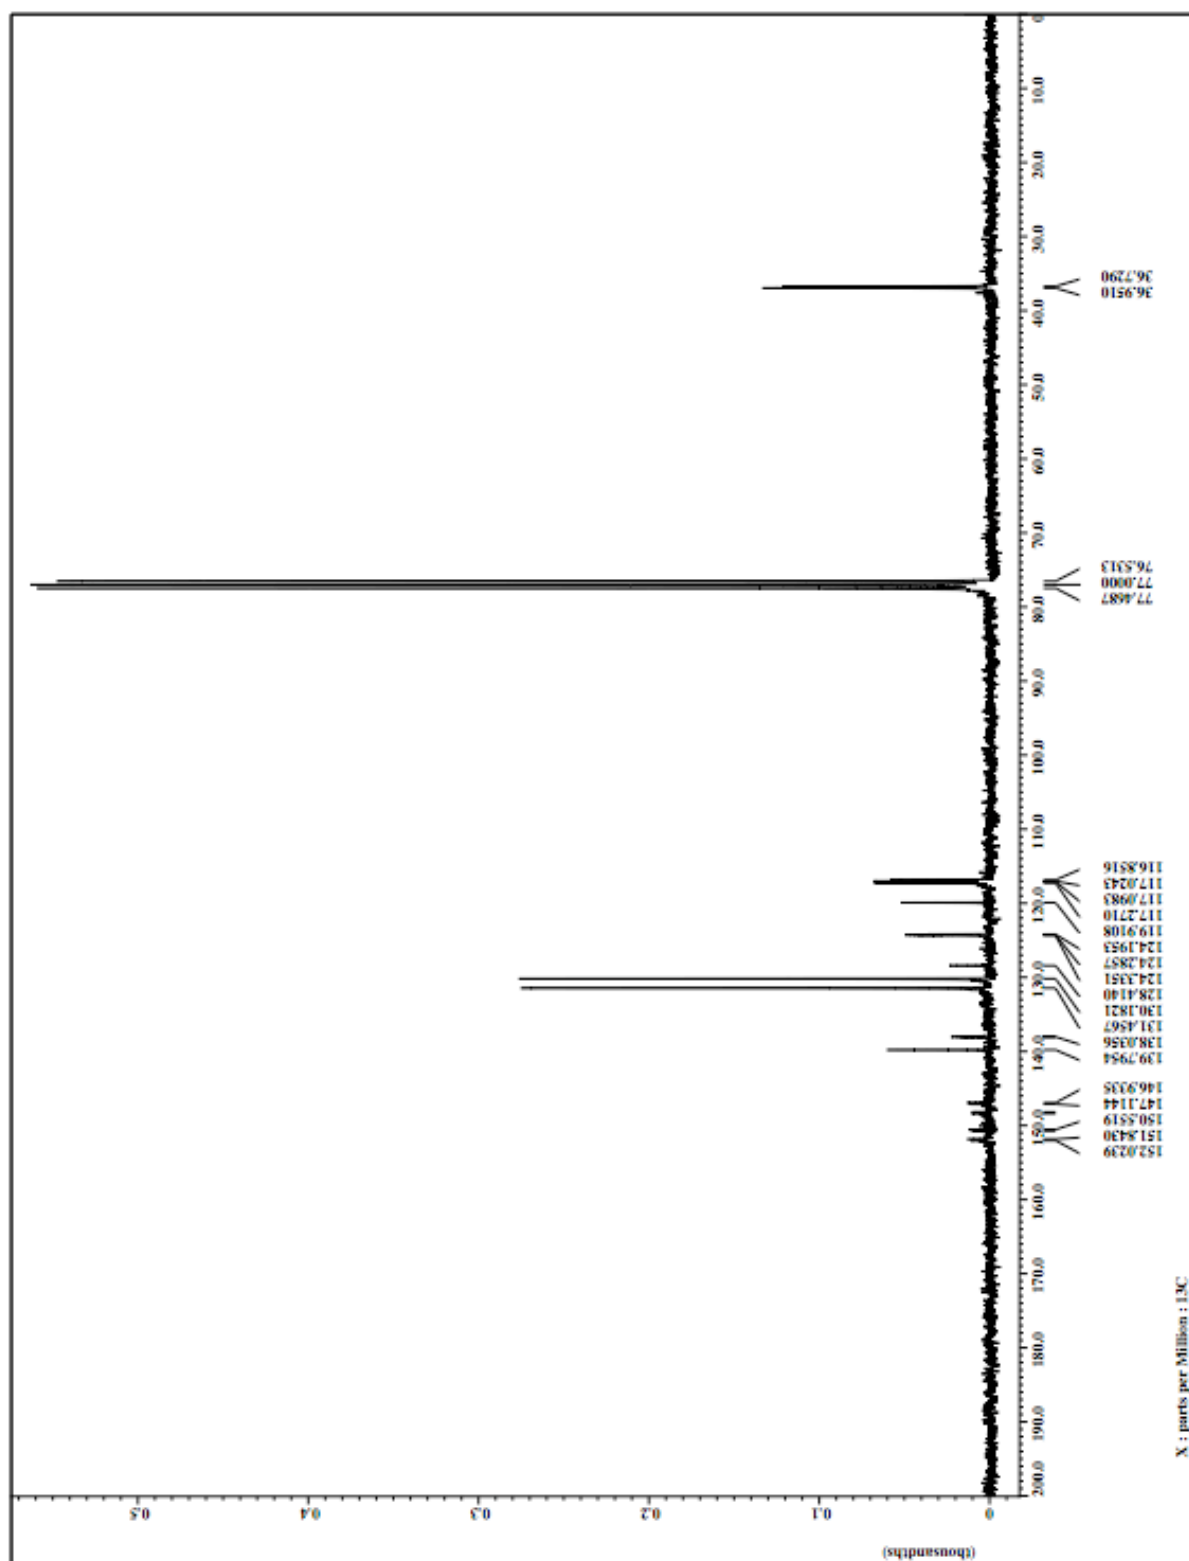

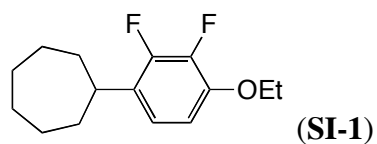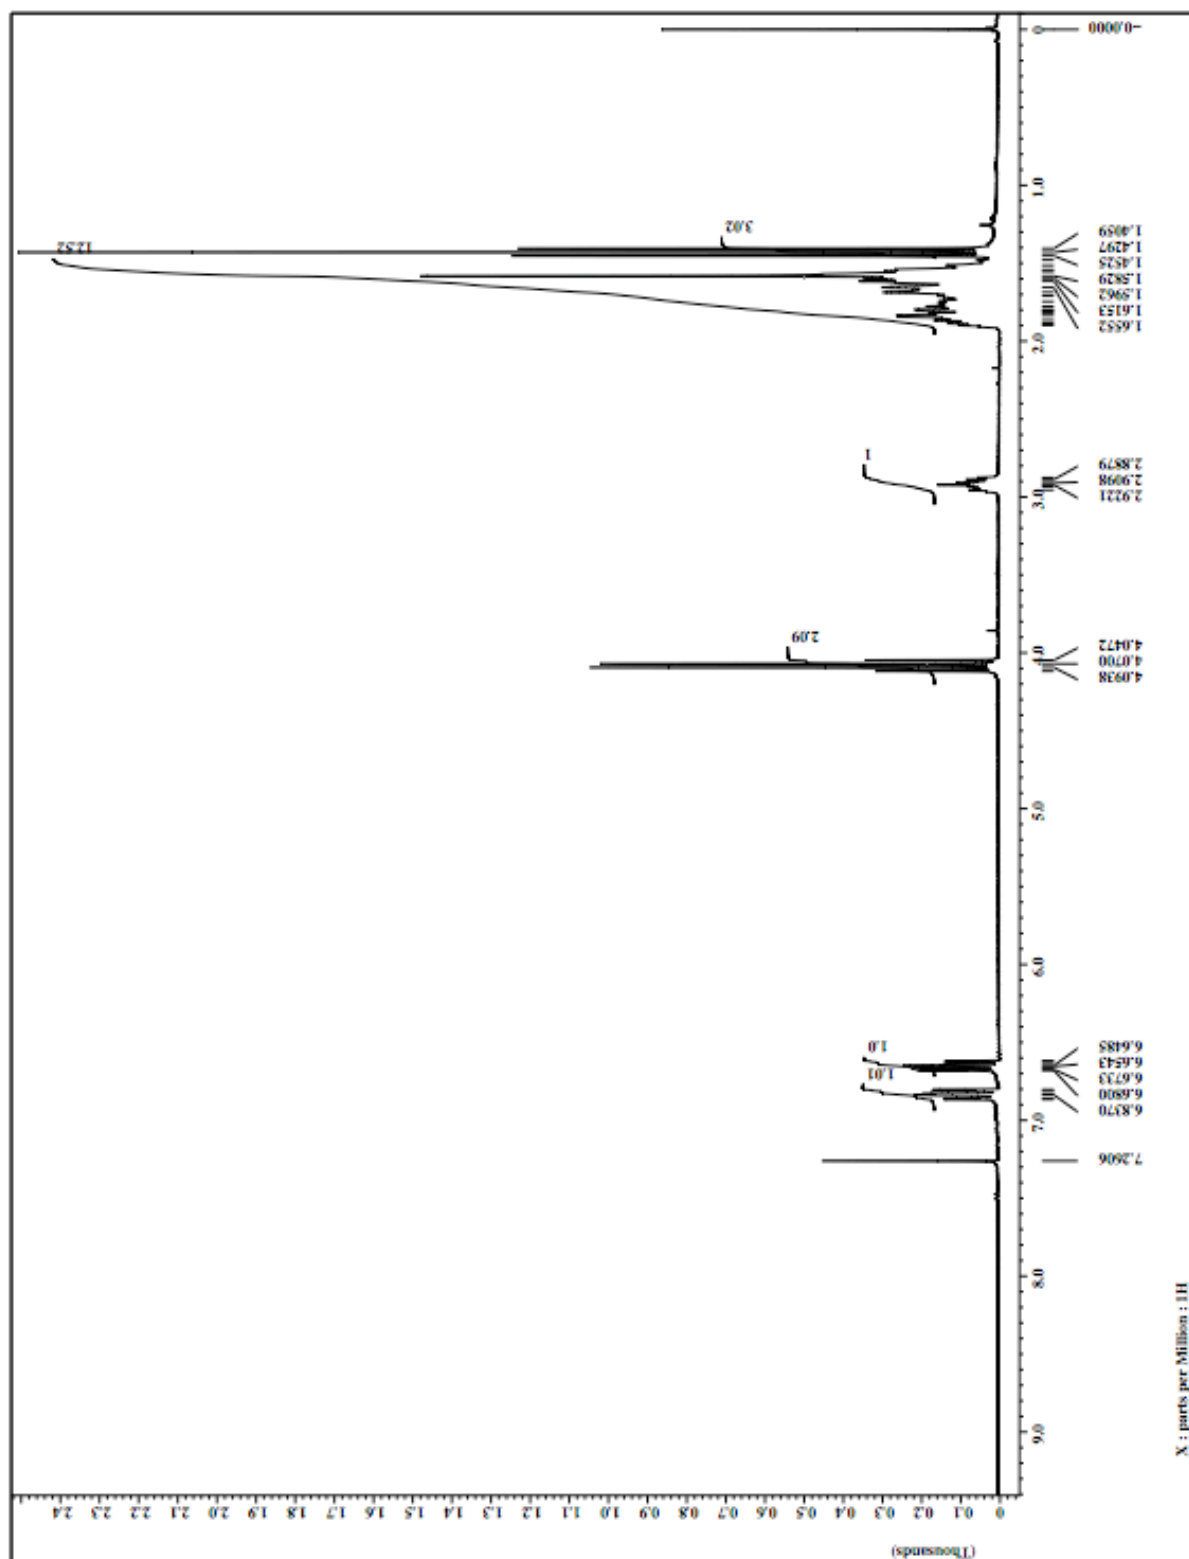

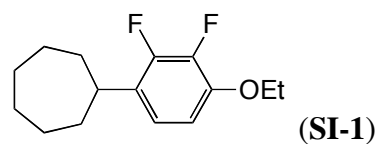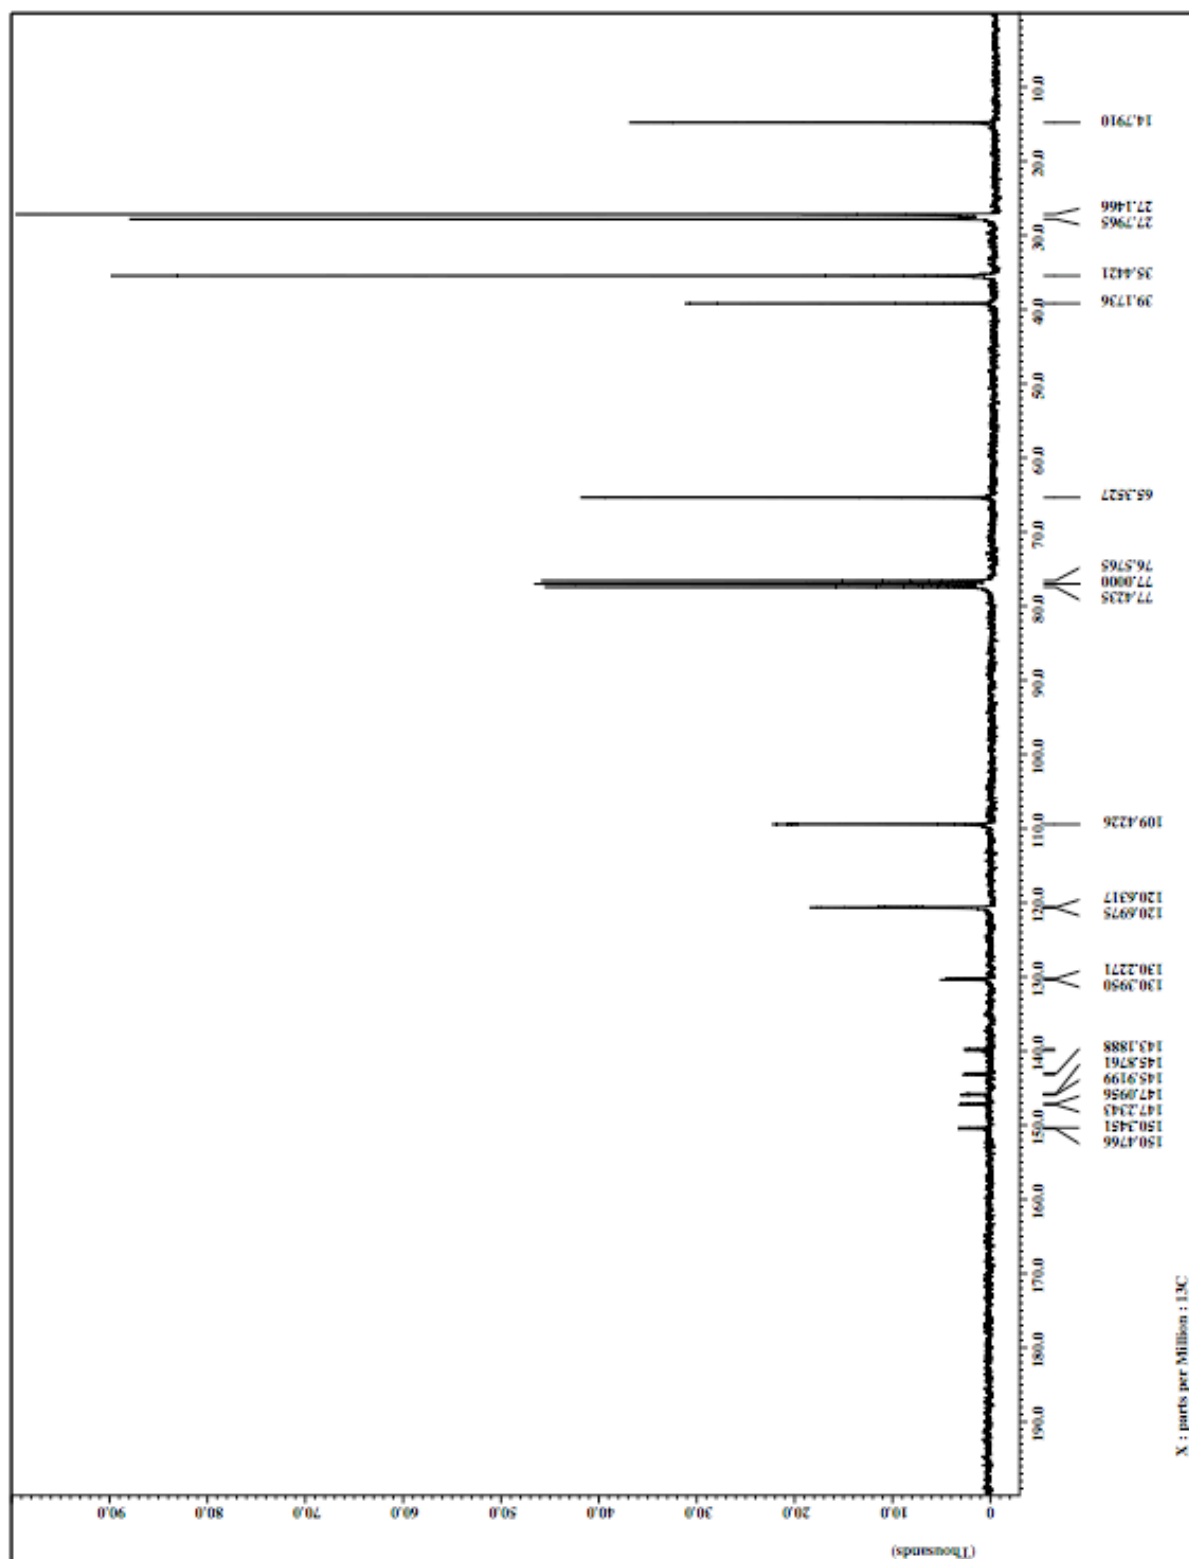

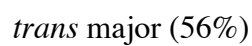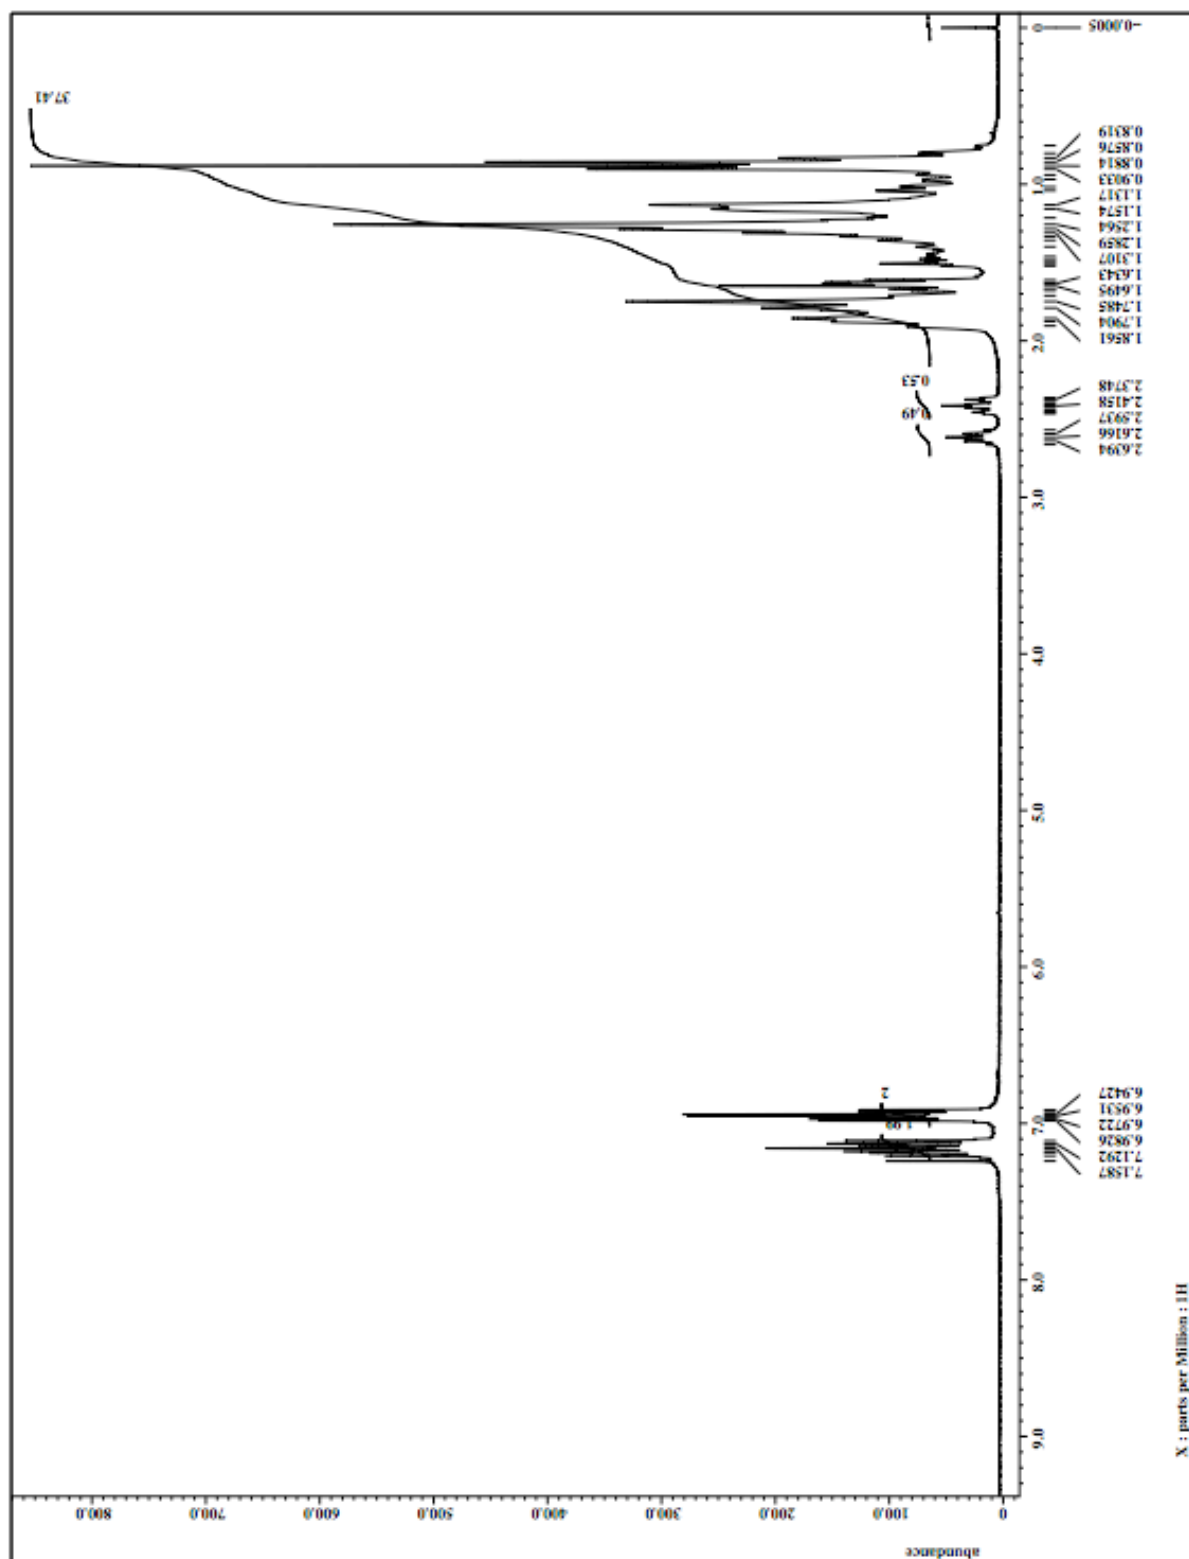



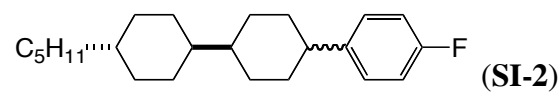

*trans* major (56%)

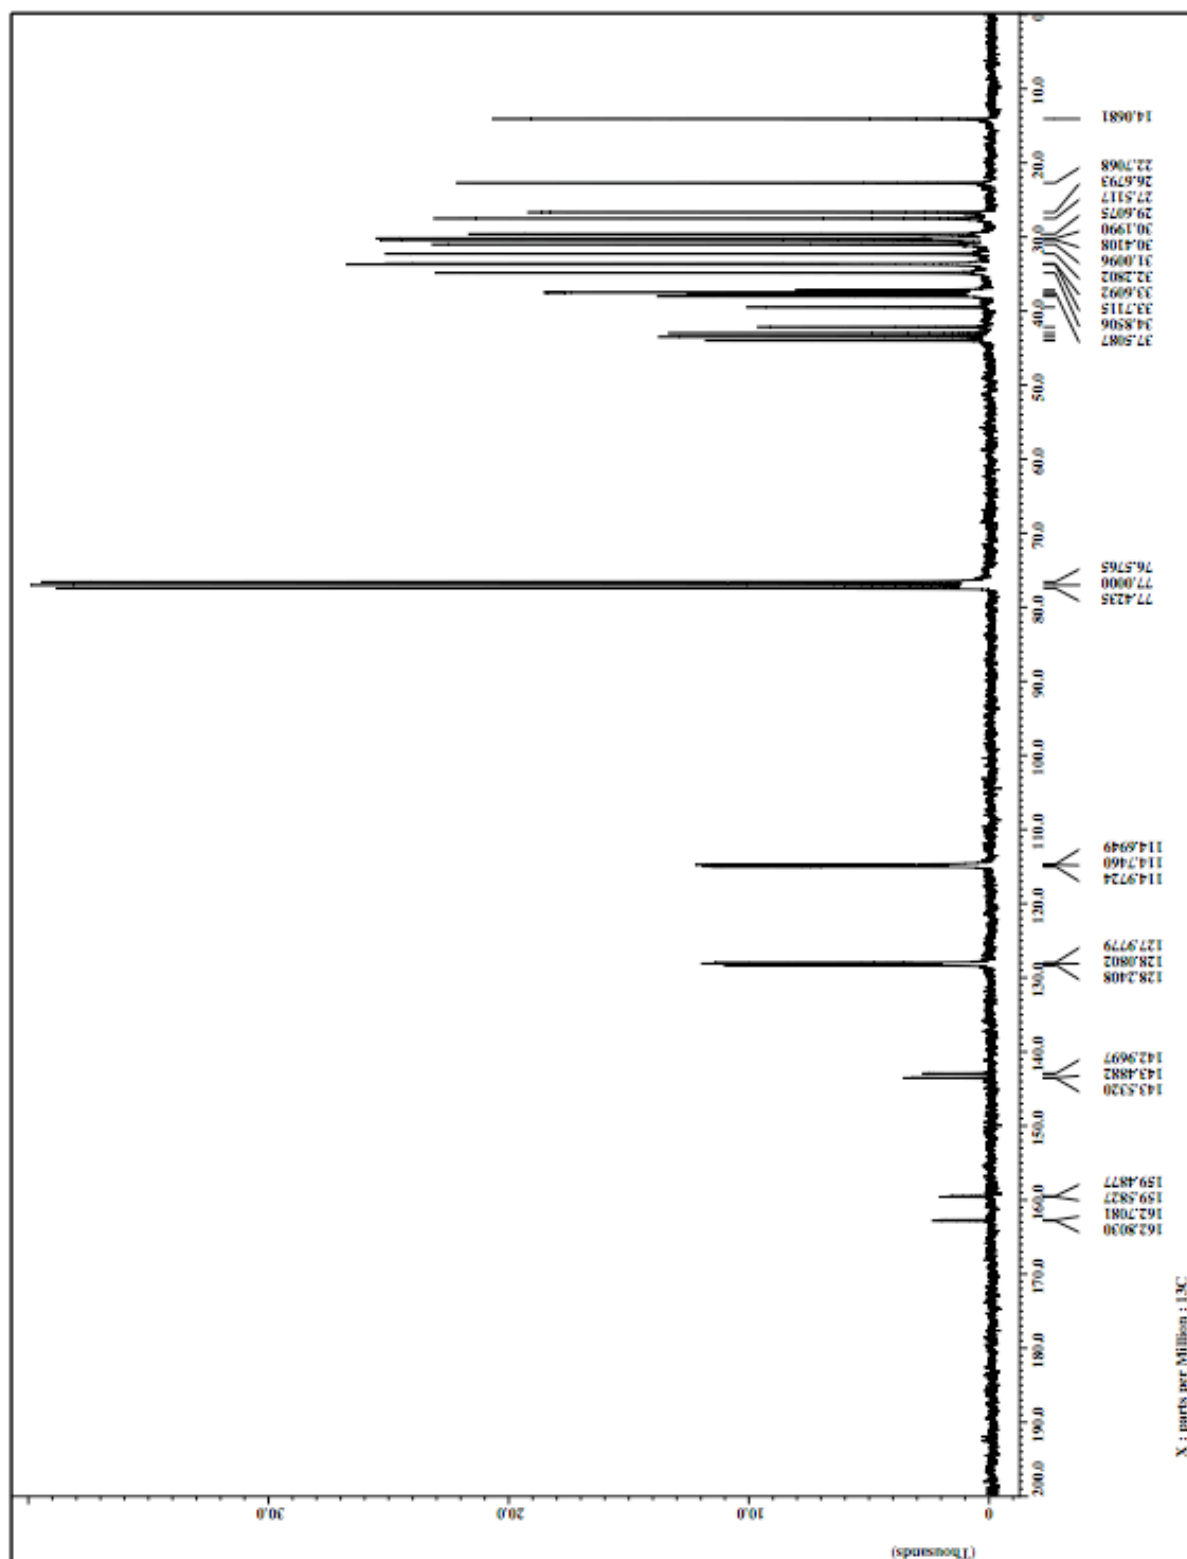

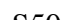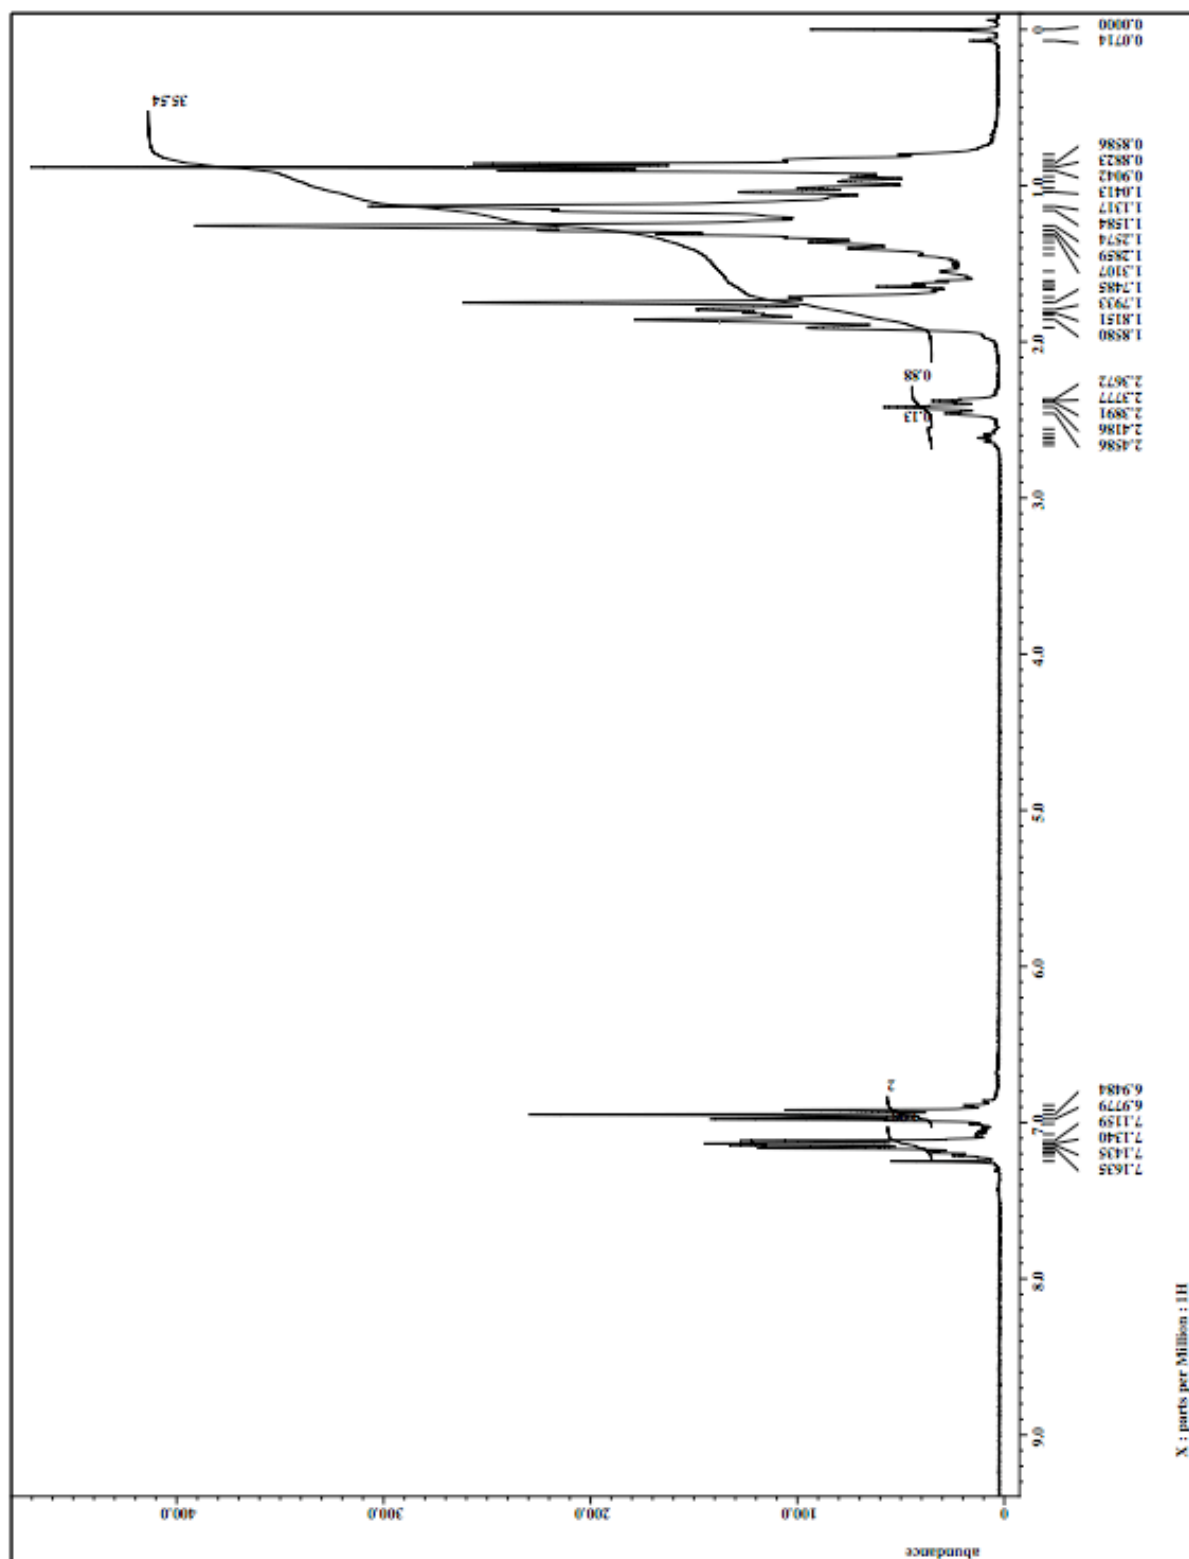

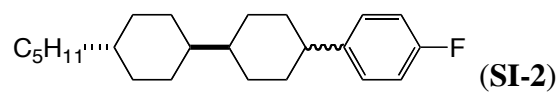

*trans* major (88%)

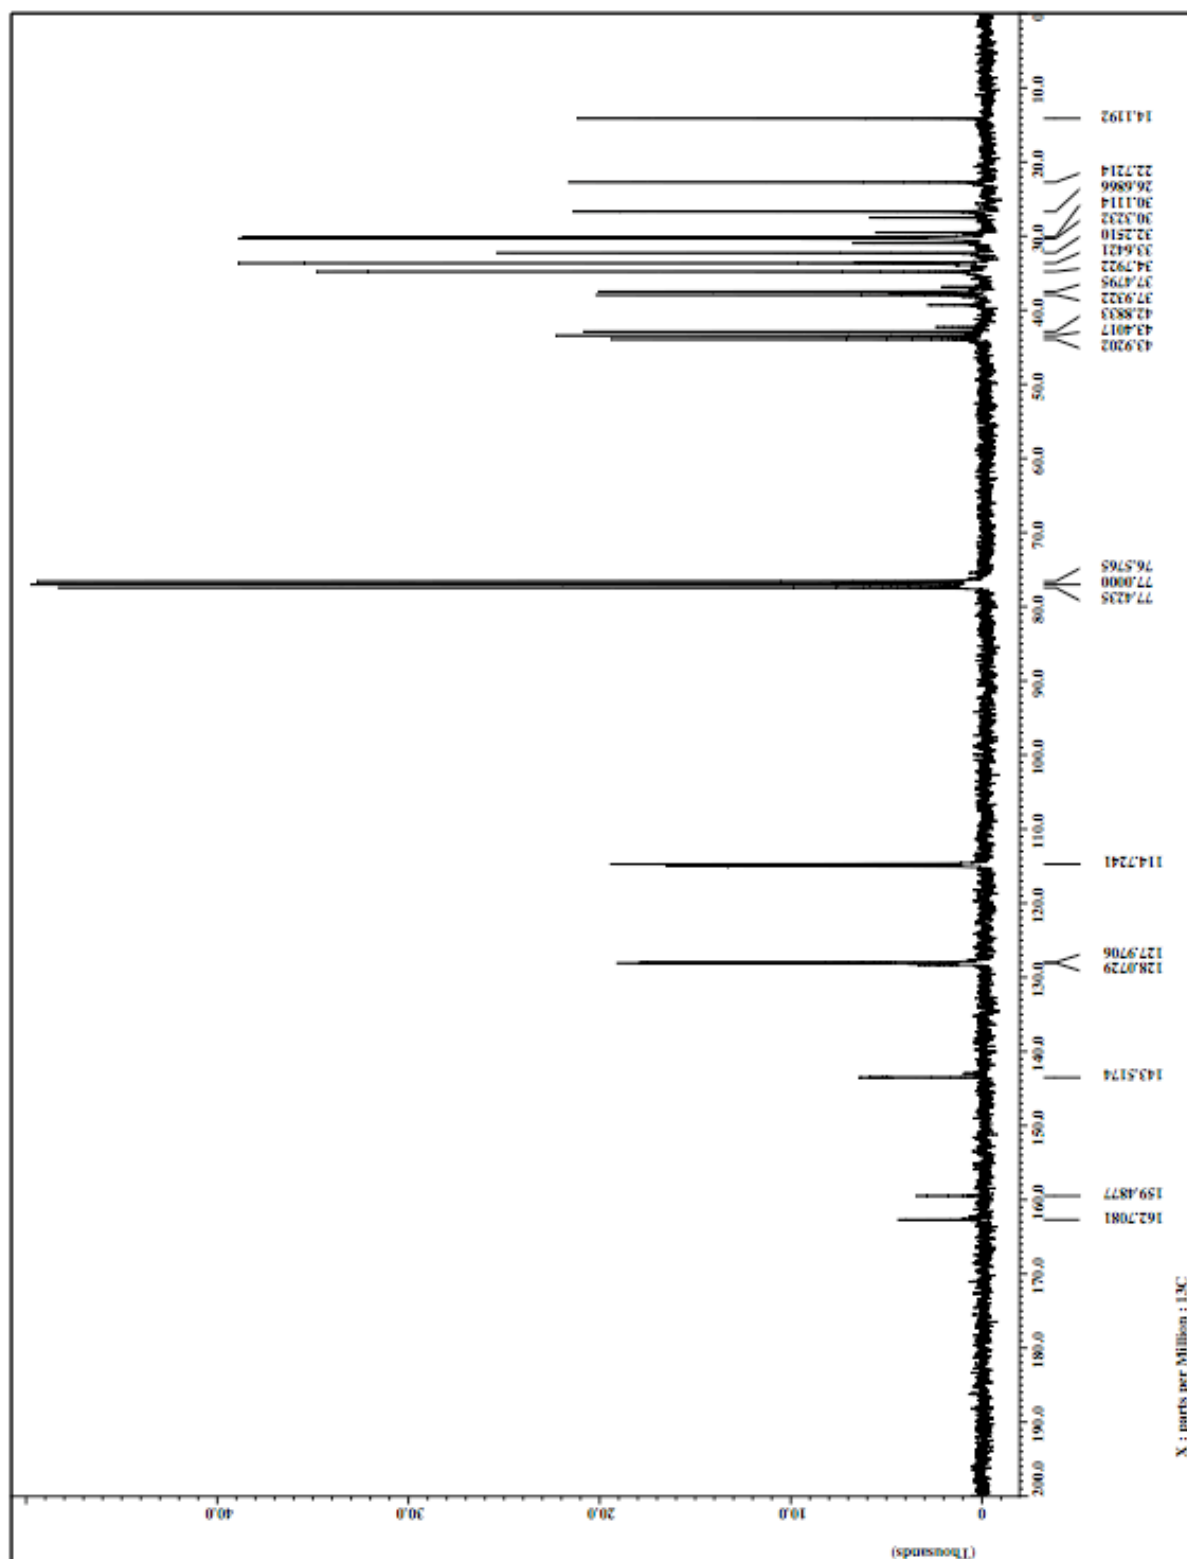

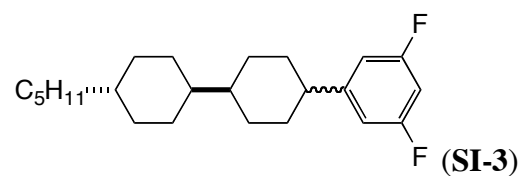

*cis:trans* = 44:56

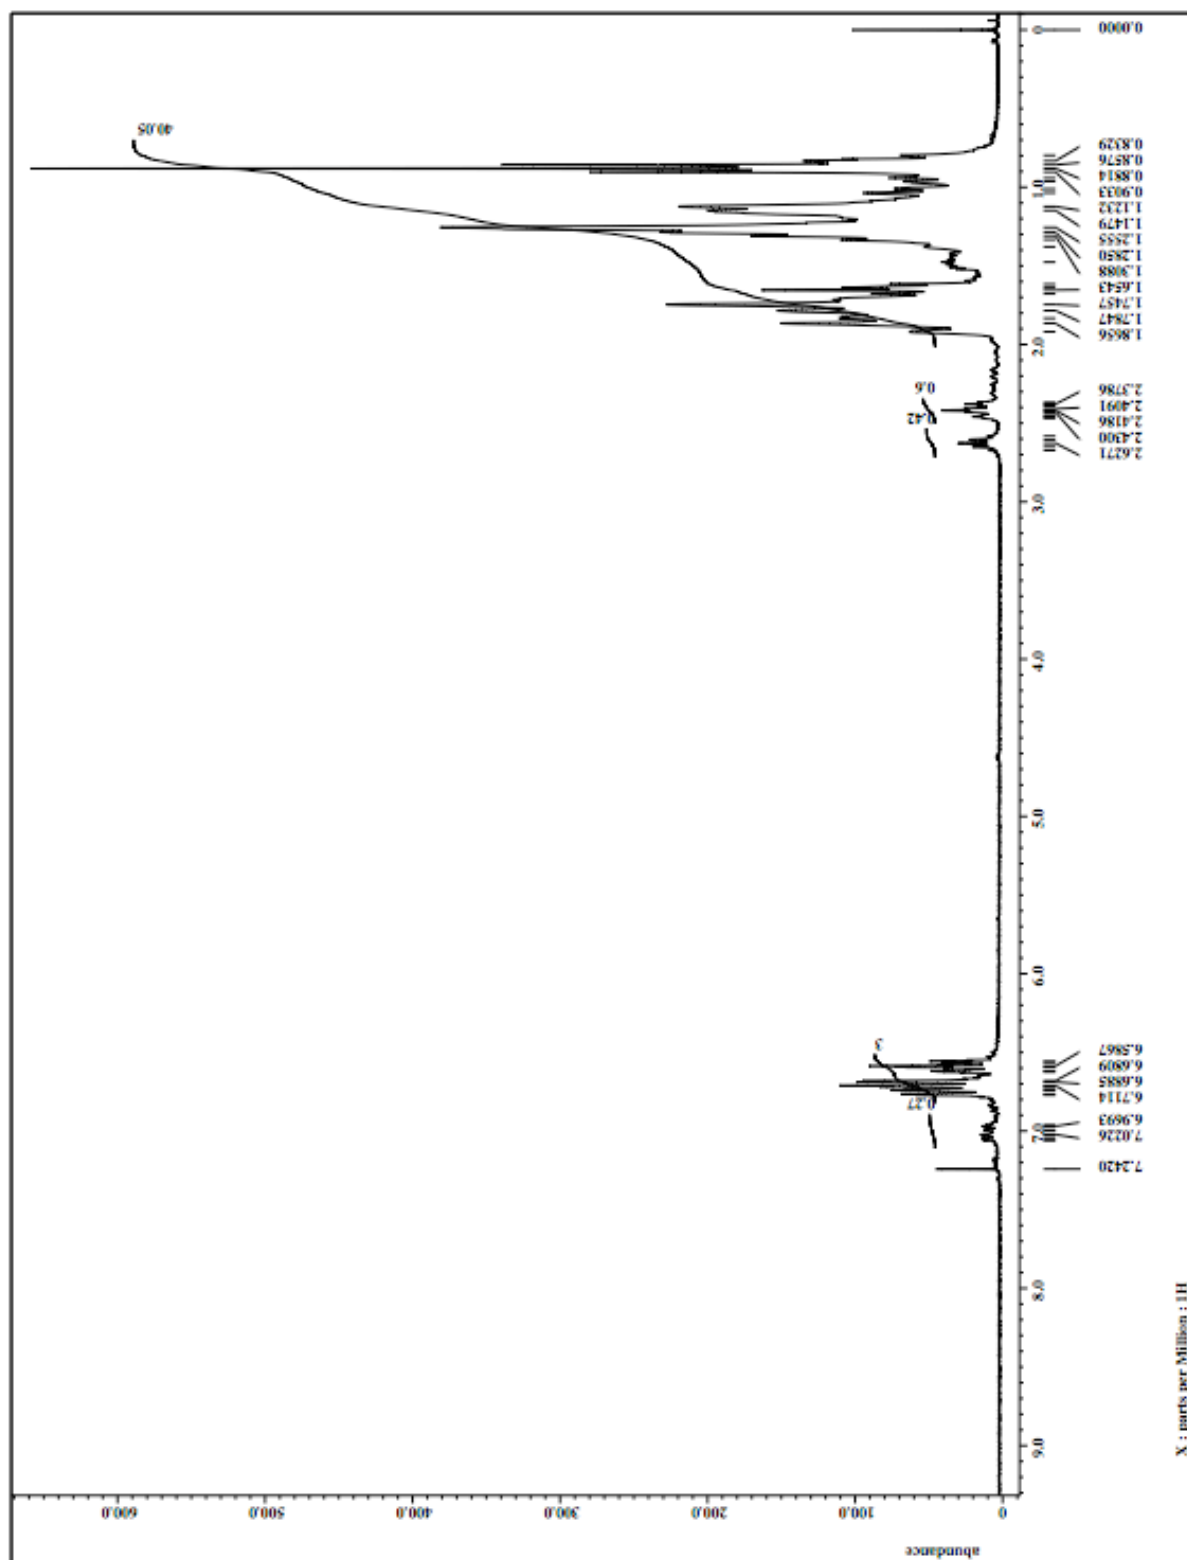

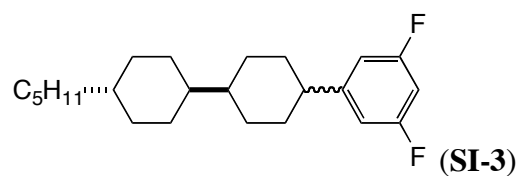

*cis:trans* = 44:56

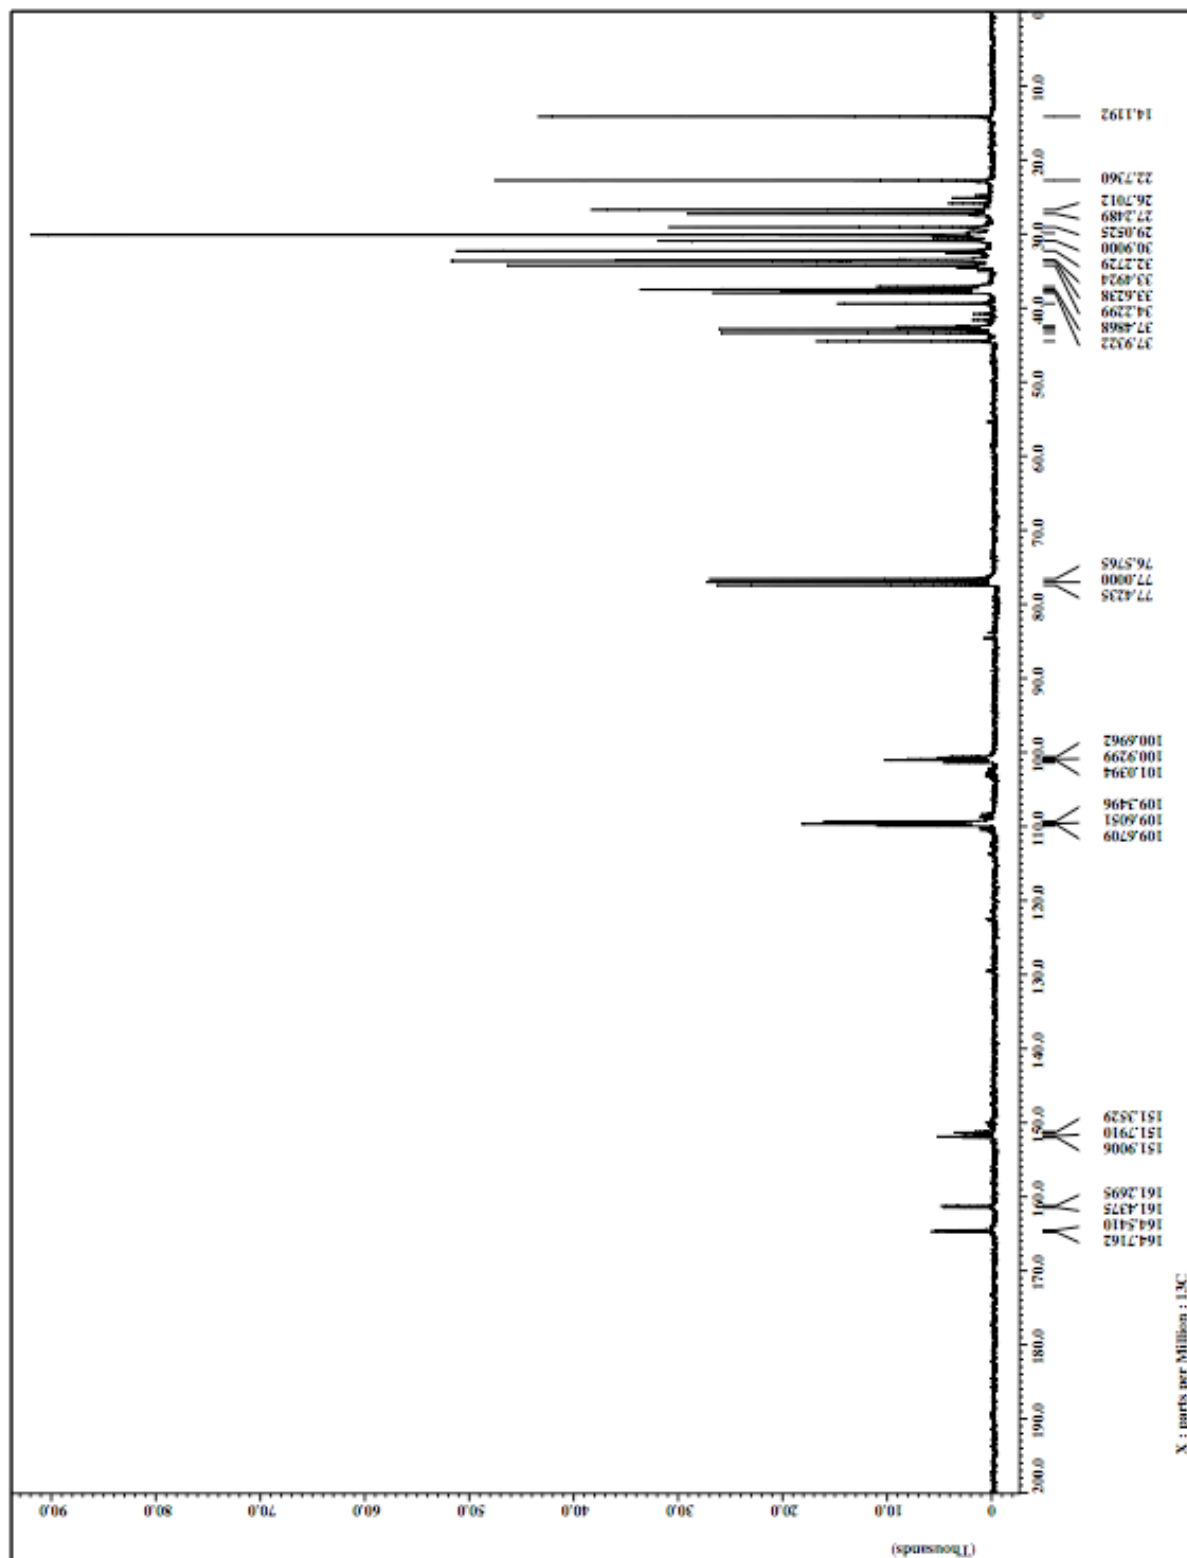

Supplement: b820879d.pdf [file b820879d.pdf]
